# Supplementary material for: Rhodium-catalysed connective synthesis of diverse reactive probes bearing S(VI) electrophilic warheads
Source: publisher site journal article supplement (doi:10.3762/bjoc.21.150), 2025-09-17
Supplement: Additional file 1 [file 1860-5397-21-150-S1.pdf]

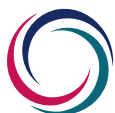

## Supporting Information

for

### **Rhodium-catalysed connective synthesis of diverse reactive probes bearing S(VI) electrophilic warheads**

Scott Rice, Julian Chesti, William R. T. Mosedale, Megan H. Wright, Stephen P. Marsden, Terry K. Smith and Adam Nelson

*Beilstein J. Org. Chem.* **2025**, 21, 1924–1931. doi:10.3762/bjoc.21.150

### **Experimental part and NMR spectra of synthesised compounds**

## General experimental

Commercially available starting materials were obtained from Sigma–Aldrich, Fluorochem and Alfa Aesar. All non-aqueous reactions were performed under nitrogen atmosphere unless otherwise stated. Water-sensitive reactions were performed in anhydrous solvents in oven-dried glassware cooled under nitrogen before use. Anhydrous dichloromethane (DCM), anhydrous tetrahydrofuran (THF), anhydrous toluene, anhydrous diethyl ether, anhydrous ethanol, anhydrous methanol and anhydrous acetonitrile were obtained from a PureSolv MD5 Purification System. All other solvents used were of chromatography or analytical grade. An IKA RV 10 rotary evaporator was used to remove the solvents under reduced pressure.

Thin-layer chromatography (TLC) was performed using aluminium backed silica (Merck silica gel 60 F254) plates obtained from Merck. Ultraviolet lamp ( $\lambda_{\text{max}} = 254 \text{ nm}$ ) and  $\text{KMnO}_4$  were used for visualisation. Flash column chromatography was performed using silica gel 60 (35–70  $\mu\text{m}$  particles) supplied by Merck.

Preparative HPLC was performed using a Water (2767) instrument with a Water SQ detector 2. The system used an XBridge C18 19.0  $\times$  100 mm 5 micron OBD column. The general preparation method used a solvent system of MeCN/ $\text{H}_2\text{O}$  (5–95%) + 0.1% formic acid.

A Bruker MaXis Impact spectrometer with electrospray (ES) ionisation source was used for high-resolution mass spectrometry (HRMS). A Bruker Alpha-P ATR FR-IR spectrometer was used to analyse the infrared spectra.

Proton ( $^1\text{H}$ ) and carbon ( $^{13}\text{C}$ ) NMR data was collected on a Bruker 300 (AV3 NMR spectrometer operating at 7.05 T and equipped with a 5 mm BBO probe), 400 (AV3HD NMR spectrometer operating at 9.4 T and equipped with a 5 mm BBO probe) and 500 (AV-NEO NMR spectrometer operating at 11.7 T and equipped with a 5 mm DCH cryoprobe) MHz spectrometer. Fluorine ( $^{19}\text{F}$ ) NMR data was collected on a Bruker 500 (AV-NEO NMR spectrometer operating at 11.7 T and equipped with 5 mm TBO ( $^1\text{H}/^{19}\text{F}/\text{BB}$ ) and TXI ( $^1\text{H}/^{13}\text{C}/^{15}\text{N}$ ) probes) MHz spectrometer. Data was collected at 298 K unless otherwise stated. Chemical shifts ( $\delta$ ) are given in parts per million (ppm) and they are referenced to the residual solvent peak. Coupling constants ( $J$ ) are reported in hertz (Hz) and splitting patterns are reported in an abbreviated manner: app. (apparent), s (singlet), d (doublet), t (triplet), q (quartet), pent (pentet), sept (septet), m (multiplet), br (broad). Assignments were made using COSY, DEPT, HSQC, HMBC and NOESY experiments.

## General procedure A: implementation of reaction arrays

By modification of an existing procedure,<sup>1a</sup> the reaction arrays were carried out in a 96-well plate (8 × 12) custom made out of PTFE in borosilicate glass vials (vial volume = 750  $\mu$ L, vial dimensions = 8 × 30 mm, CV-2100-0830 Chemglass). Diazo substrates were typically dissolved in DCM to give 1.25 M stock solutions. Co-substrates were dissolved in DCM to give 6.25 M stock solutions. Stock solutions of the catalysts were then prepared that were 1.00 mM in DCM. Then, 16  $\mu$ L of the appropriate diazo substrate stock solution was added to the appropriate wells and the solvent was evaporated. Then, 16  $\mu$ L of the appropriate co-substrate stock solution was added to the appropriate wells and evaporated. This was followed by the addition of 200  $\mu$ L of the catalyst stock solution. Lastly, each of the reaction wells in the plate was capped. The final volume of the reaction mixture was 200  $\mu$ L; with final concentrations of catalyst (1 mM), substrate (100 mM) and co-substrate (500 mM). The wells were left to react at rt, without any stirring, for 48 h and the crude mixtures were concentrated under reduced pressure overnight to remove any residual DCM. The wells were re-dissolved in 200  $\mu$ L of DMSO to give a total product concentration of 100 mM and transferred to a 96-well plate ready for subsequent analysis<sup>1b,1c</sup> and purification.

## 4-Iodobenzenesulfonyl fluoride

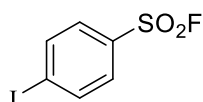

4-Iodobenzenesulfonyl chloride (1.00 g, 3.33 mmol) was dissolved in MeCN (3.33 mL) then a solution of KHF<sub>2</sub> (515 mg, 6.66 mmol) in water (1.67 mL) was added and the resulting biphasic mixture stirred at rt for 18 h. The phases were separated and the aqueous phase was then extracted with EtOAc (3 × 30 mL). The organic phases were combined, washed with sat. aq. NaHCO<sub>3</sub> (20 mL) and brine (20 mL), dried (MgSO<sub>4</sub>), filtered and concentrated under reduced pressure to give sulfonyl fluoride<sup>2</sup> (721 mg, 76%) as a white solid. *R*<sub>f</sub> 0.50 (EtOAc–hexane 10:90).  $\delta_{\text{H}}$  (500 MHz, CDCl<sub>3</sub>): 8.01 (2H, d, *J* 8.4 Hz, 3-H and 5-H), 7.71 (2H, d, *J* 8.4 Hz, 2-H and 6-H);  $\delta_{\text{C}}$  (125 MHz, CDCl<sub>3</sub>): 139.2 (C<sub>2</sub>-3,5), 132.8 (d, *J* 25.6 Hz, C-1), 129.6 (C<sub>2</sub>-2,6), 104.2 (C-4);  $\delta_{\text{F}}$  (470 MHz, CDCl<sub>3</sub>): 66.2 (SO<sub>2</sub>F). All data is consistent with known literature values.<sup>2</sup>

## 2-((4-Iodophenyl)sulfonyl)-2H-1,2,3-triazole

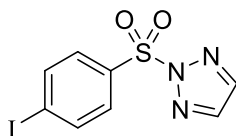

4-Iodobenzenesulfonyl chloride (302 mg, 1 mmol) was dissolved in  $\text{CH}_2\text{Cl}_2$  (5.0 mL) and the solution was cooled in an ice bath. 1H-1,2,3-Triazole (175  $\mu\text{L}$ , 3 mmol) was then added dropwise to the solution followed by *N,N*-diisopropylethylamine (347  $\mu\text{L}$ , 2 mmol). The reaction was allowed to stir overnight at room temperature after which the solvent was removed under reduced pressure to give a colourless oil which was purified by flash column chromatography, eluting with  $\text{CH}_2\text{Cl}_2$ , to yield the sulfonyltriazole as a colourless solid (200 mg, 60%).  $R_f$  0.62 ( $\text{CH}_2\text{Cl}_2$ );  $\nu_{\text{max}}/\text{cm}^{-1}$  3137, 3084, 1566, 1470, 1391, 1276, 1192, 1171, 1135, 1085, 1052, 1005, 954, 929, 854, 815, 737, 696, 641, 603, 568, 482 and 470.  $\delta_{\text{H}}$  (500 MHz,  $\text{CDCl}_3$ ) 7.94-7.91 (2H, d,  $J$  8.8 Hz, phenyl 3,5- $\text{H}_2$ ), 7.86 (2H, s, 4,5- $\text{H}_2$ ), 7.80-7.77 (2H, d,  $J$  8.7 Hz, phenyl 2,6- $\text{H}_2$ ).  $\delta_{\text{C}}$  (125 MHz,  $\text{CDCl}_3$ ) 139.1 (phenyl C<sub>2</sub>-3,5), 138.8 (C<sub>2</sub>-4,5), 135.6 (phenyl C-1), 129.9 (phenyl C<sub>2</sub>-2,6), 104.1 (phenyl C-4). HRMS found  $\text{MNa}^+$  357.9119.  $\text{C}_8\text{H}_6\text{IN}_3\text{O}_2\text{S}$  requires  $\text{MNa}$ , 357.9118.

## 4-Iodophenyl sulfurofluoridate

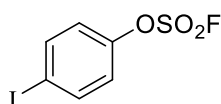

4-Iodophenol (220 mg, 1.0 mmol) was placed under nitrogen and dissolved in  $\text{CH}_2\text{Cl}_2$  (3.3 mL, 0.2M). Pyridine (161  $\mu\text{L}$ , 2.0 mmol) was added to the stirred solution which was then cooled in an acetone/dry-ice bath.  $\text{SO}_2\text{Cl}_2$  (2.0 mL, 1.0 M in  $\text{CH}_2\text{Cl}_2$ ) was added dropwise to the reaction mixture which was then allowed to reach room temperature. The reaction was allowed to stir overnight and was then diluted with EtOAc (10 mL) and transferred into a separation funnel together with 1 M aqueous hydrochloric acid (30 mL). The organic layer was collected and the aqueous was extracted with further EtOAc (3  $\times$  30 mL). The combined organic layers were dried with  $\text{Na}_2\text{SO}_4$ , filtered, and the removal of solvent under reduced pressure gave the intermediate *sulfurochloridate* as a light brown oil (314 mg, >98%). 4-Iodophenyl sulfurochloridate (314 mg, 1.0 mmol) was dissolved in  $\text{CH}_3\text{CN}$  (3.3 mL) and AgF

(380 mg, 3.0 mmol) was added to the mixture. The reaction was then allowed to stir overnight at room temperature. The solution was then diluted with CH<sub>3</sub>CN (5 mL) and filtered over Celite, the Celite cake was washed with EtOAc and the solvent was removed under reduced pressure to yield a light brown oil. The crude product was dissolved in chloroform (3 mL) and the colourless precipitate formed was filtered off and discarded. The filtrate was collected, and the solvent was removed under reduced pressure to yield the *fluorosulfate*<sup>3</sup> as a colourless solid (229 mg, 76%). *R*<sub>F</sub> = 0.26 (hexane).  $\delta_{\text{H}}$  (500 MHz, CDCl<sub>3</sub>) 7.82-7.79 (2H, d, *J* 9.0 Hz, phenyl 3,5-H<sub>2</sub>), 7.12-7.09 (2H, dd, *J* 9.0 and 0.91 Hz, phenyl 2,6-H<sub>2</sub>).  $\delta_{\text{C}}$  (125 MHz, CDCl<sub>3</sub>) 150.0 (phenyl C-1), 139.7 (phenyl C<sub>2</sub>-3,5), 123.0 (phenyl C<sub>2</sub>-2,6), 93.6 (phenyl C-4).  $\delta_{\text{F}}$  (376 MHz, CDCl<sub>3</sub>) 37.93 (SO<sub>3</sub>F). All data is consistent with known literature values.<sup>3</sup>

### 1-(Morpholin-4-yl)butane-1,3-dione

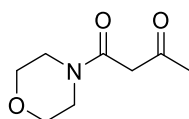

Morpholine (1.00 g, 11.5 mmol) was dissolved in toluene (100 mL) then 2,2,6-trimethyl-4*H*-1,3-dioxin-4-one (2.30 mL, 17.3 mmol) was added dropwise over 5 min and the resulting solution was stirred at rt for 15 min. The reaction mixture was stirred at 110 °C for a further 18 h then concentrated under reduced pressure to give a crude material. This was purified via column chromatography, eluting EtOAc–hexane 50:50 → EtOAc to give 1,3-dicarbonyl derivative<sup>4</sup> (1.85 g, 94%, *keto:enol* 85:15 by <sup>1</sup>H NMR) as a pale-yellow oil. *R*<sub>F</sub> 0.17 (EtOAc).  $\delta_{\text{H}}$  (500 MHz, CDCl<sub>3</sub>): 14.55 (1H, s, OH<sup>enol</sup>), 5.06 (1H, s, 2-H<sup>enol</sup>), 3.64-3.60 (8H, m, morpholinyl 2,6-H<sub>2</sub>), 3.59-3.56 (4H, m, morpholinyl 3-H<sub>2</sub> or morpholinyl 5-H<sub>2</sub>), 3.51 (2H, s, 2-H<sub>2</sub><sup>keto</sup>), 3.38-3.34 (4H, m, morpholinyl 3-H<sub>2</sub> or morpholinyl 5-H<sub>2</sub>), 2.22 (3H, s, 4-H<sub>3</sub><sup>keto</sup>), 1.90 (3H, s, 4-H<sub>3</sub><sup>enol</sup>);  $\delta_{\text{C}}$  (125 MHz, CDCl<sub>3</sub>): 202.2 (C-3<sup>keto</sup>), 175.5 (C-3<sup>enol</sup>), 170.8 (C-1<sup>enol</sup>), 165.0 (C-1<sup>keto</sup>), 86.2 (C-2<sup>enol</sup>), 66.7 (morpholinyl C<sub>A</sub>-2,6), 66.6 (morpholinyl C<sub>B</sub>-2,6), 49.8 (C-2<sup>keto</sup>), 46.8 (morpholinyl C<sub>A</sub>-3,5), 42.2 (morpholinyl C<sub>B</sub>-3,5) 30.3 (C-4<sup>keto</sup>), 22.0 (C-4<sup>enol</sup>). All data is consistent with known literature values.<sup>4</sup>

## 2-Diazo-1-(morpholin-4-yl)butane-1,3-dione

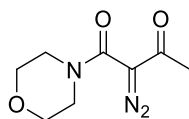

1-(Morpholin-4-yl)butane-1,3-dione (1.85 g, 10.8 mmol) and *p*-ABSA (2.86 g, 11.9 mmol) were dissolved in MeCN (40 mL) then Et<sub>3</sub>N (1.66 mL, 11.9 mmol) was added at rt. The resulting solution was at rt for 24 h, then filtered through Celite (eluting with EtOAc) to remove any solids. The filtrate was concentrated under reduced pressure to give a crude material. This was then purified via column chromatography, eluting with EtOAc–hexane 50:50 → EtOAc to give the diazo derivative<sup>4</sup> (1.71 g, 80%) as a yellow oil. *R*<sub>f</sub> 0.26 (EtOAc).  $\delta_{\text{H}}$  (500 MHz, CDCl<sub>3</sub>): 3.72–3.68 (4H, m, morpholinyl 2,6-H<sub>2</sub>), 3.53–3.45 (4H, m, morpholinyl 3,5-H<sub>2</sub>), 2.30 (3H, s, 4-H<sub>3</sub>);  $\delta_{\text{C}}$  (125 MHz, CDCl<sub>3</sub>): 188.0 (C-3), 160.4 (C-1), 74.7 (C-2), 66.8 (morpholinyl C<sub>2</sub>-2,6), 46.1 (morpholinyl C<sub>2</sub>-3,5), 27.2 (C-4). All data is consistent with known literature values.<sup>4</sup>

## 4-[1-Diazo-2-(morpholin-4-yl)-2-oxoethyl]benzene-1-sulfonyl fluoride (D1)

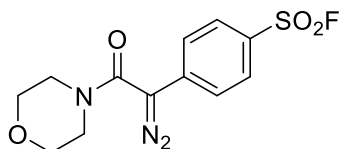

2-Diazo-1-(morpholin-4-yl)butane-1,3-dione (1.70 g, 8.63 mmol) was dissolved in MeCN (20 mL) then 10% aq. KOH (20 mL) was added and the resulting solution allowed to stir at rt for 18 h. EtOAc (50 mL) was added and the phases then separated. The aqueous phase was extracted with EtOAc (3 × 30 mL), organic phases combined, washed with sat. aq. ammonium chloride (40 mL), dried (MgSO<sub>4</sub>), filtered and concentrated under reduced pressure to give the deacetylate diazo intermediate (736 mg, 55%) as a yellow oil. This intermediate (736 mg, 4.74 mmol) was then dissolved in toluene (20 mL) and Pd(PPh<sub>3</sub>)<sub>4</sub> (274 mg, 5 mol %), Ag<sub>2</sub>CO<sub>3</sub> (654 mg, 2.37 mmol), 4-iodobenzenesulfonyl fluoride (1.76 g, 6.12 mmol) and Et<sub>3</sub>N (0.85 mL, 6.12 mmol) were added and the resulting mixture allowed to stir at rt for 4 h. The mixture was filtered through Celite (eluting with EtOAc) and the filtrate concentrated under reduced pressure to give a crude material. This was purified via column chromatography, eluting with EtOAc–hexane 70:30 to give the *sulfonyl fluoride diazo*

derivative **D1** (0.68 g, 46%) as a bright yellow oil that solidified upon drying to give a yellow solid.  $R_f$  0.40 (EtOAc–hexane 70:30).  $\nu_{\max}/\text{cm}^{-1}$ : 2983, 2922, 2860, 2072, 1639, 1586, 1460, 1212, 1193;  $\delta_{\text{H}}$  (500 MHz,  $\text{CDCl}_3$ ): 7.96 (2H, d,  $J$  8.8 Hz, aryl 2,6-H), 7.44 (2H, d,  $J$  8.8 Hz, aryl 3,5-H), 3.75–3.70 (4H, m, morpholinyl 2,6- $\text{H}_2$ ), 3.55–3.52 (4H, m, morpholinyl 3,5- $\text{H}_2$ );  $\delta_{\text{C}}$  (125 MHz,  $\text{CDCl}_3$ ): 163.2 (C-2), 136.9 (aryl C-4), 129.4 (aryl C<sub>2</sub>-2,6), 128.9 (d,  $J$  25.1 Hz, aryl C-1), 123.7 (aryl C<sub>2</sub>-3,5), 66.7 (morpholinyl C<sub>2</sub>-2,6), 46.2 (morpholinyl C<sub>2</sub>-3,5) (C-1 not observed);  $\delta_{\text{F}}$  (470 MHz,  $\text{CDCl}_3$ ): 66.7 ( $\text{SO}_2\text{F}$ ); HRMS found  $\text{MNa}^+$  336.0422.  $\text{C}_{12}\text{H}_{12}\text{FN}_3\text{O}_4\text{S}$  requires  $\text{MNa}$ , 336.0425.

#### 4-(1-Diazo-2-morpholino-2-oxoethyl)phenyl sulfurofluoridate (**D4**)

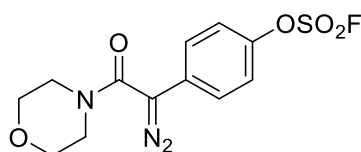

$\text{Pd}(\text{PPh}_3)_4$  (144 mg, 5 mol %) and  $\text{Ag}_2\text{CO}_3$  (348 mg, 1.2 mmol) were added to 4-iodobenzenesulfonyl fluoride (1.00 g, 3.3 mmol). A solution of 2-diazo-1-morpholinoethan-1-one (388 mg, 2.5 mmol) in toluene (12.5 mL) was then transferred to the solid starting materials followed by  $\text{Et}_3\text{N}$  (348  $\mu\text{L}$ , 2.5 mmol). The reaction was allowed to stir under nitrogen for 4 h, filtered over Celite and the Celite cake was washed with EtOAc (50 mL). The removal of solvent under reduced pressure yielded a brown oil which was purified by flash column chromatography, eluting EtOAc/hexane 0:100  $\rightarrow$  30:70, to give the *sulfurofluoridate diazo derivative* **D4** as an orange oil (211 mg, 26%).  $R_f$  = 0.39 (EtOAc/hexane 50:50).  $\nu_{\max}/\text{cm}^{-1}$  3105, 3067, 2964, 2922, 2855, 2063, 1626, 1502, 1445, 1410, 1232, 1190, 1143, 1113, 1067, 1015, 988, 910, 839, 812, 766, 729, 646, 585, 543 and 510.  $\delta_{\text{H}}$  (500 MHz,  $\text{CDCl}_3$ ) 7.37–7.32 (4H, m, phenyl 3,5- $\text{H}_2$  and phenyl 2,6- $\text{H}_2$ ), 3.70 (4H, t,  $J$  9.7 and 4.6 Hz, morpholino 2,6- $\text{H}_2$ ), 3.50 (4H, t,  $J$  9.8 and 5.0 Hz, morpholino 3,5- $\text{H}_2$ ).  $\delta_{\text{C}}$  (125 MHz,  $\text{CDCl}_3$ ) 164.4 (oxoethyl C-2), 147.5 (phenyl C-1), 128.7 (phenyl C-4), 125.6 (phenyl C<sub>2</sub>-3,5), 121.8 (phenyl C<sub>2</sub>-2,6), 66.6 (morpholino C<sub>2</sub>-2,6), 62.3 (oxoethyl C-1), 46.0 (morpholino C<sub>2</sub>-3,5);  $\delta_{\text{F}}$  (376 MHz,  $\text{CDCl}_3$ ) 37.67 ( $\text{SO}_3\text{F}$ ). HRMS found  $\text{MH}^+$  330.0545.  $\text{C}_{12}\text{H}_{13}\text{FN}_3\text{O}_5\text{S}$  requires  $\text{MH}$ , 330.0554.

## 2-(4-((2*H*-1,2,3-Triazol-2-yl)sulfonyl)phenyl)-2-diazo-1-morpholinoethan-1-one (D5)

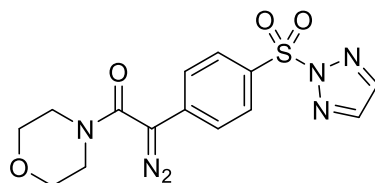

$\text{Pd(PPh}_3)_4$  (80 mg, 5 mol %) and  $\text{Ag}_2\text{CO}_3$  (192 mg, 0.7 mmol) were added to 1-((4-iodophenyl)sulfonyl)-2*H*-1,2,3-triazole (462 mg, 1.4 mmol). A solution of 2-diazo-1-morpholinoethan-1-one (214 mg, 1.4 mmol) in toluene (7 mL) was transferred to the solid reagents followed by  $\text{Et}_3\text{N}$  (192  $\mu\text{L}$ , 1.4 mmol). The reaction was allowed to stir under nitrogen for 4 h, filtered over Celite and the Celite cake was washed with EtOAc (50 mL). The removal of solvent under reduced pressure yielded a brown oil which was purified by flash column chromatography, eluting with EtOAc/hexane 0:100  $\rightarrow$  30:70, to give the *sulfonyltriazole diazo derivative* **D5** as an orange oil (115 mg, 23%).  $R_f = 0.72$  (EtOAc/hexane 80:20);  $\nu_{\text{max}}/\text{cm}^{-1}$  2962, 2922, 2856, 2070, 1630, 1585, 1493, 1394, 1321, 1274, 1250, 1187, 1166, 1113, 1092, 986, 954, 931, 835, 742, 672, 609, 576, 548 and 510.  $\delta_{\text{H}}$  (500 MHz,  $\text{CDCl}_3$ ) 8.06-8.04 (2H, m, phenyl 2,6- $\text{H}_2$ ), 7.84 (2H, s, triazolyl 4,5- $\text{H}_2$ ), 7.38-7.35 (2H, m, phenyl 3,5- $\text{H}_2$ ), 3.71-3.69 (4H, m, morpholino 3,5- $\text{H}_2$ ), 3.52-3.50 (4H, m, morpholino 2,6- $\text{H}_2$ ).  $\delta_{\text{C}}$  (125 MHz,  $\text{CDCl}_3$ ) 163.1 (C-1), 138.5 (triazolyl C2-4,5), 136.5 (phenyl C-1), 131.7 (phenyl C-4), 129.7 (phenyl C2-2,6), 123.7 (phenyl C2-3,5), 66.7 (C-2), 63.4 (morpholino C2-2,6), 46.1 (morpholino C2-3,5). HRMS found  $\text{MH}^+$  363.0863.  $\text{C}_{14}\text{H}_{14}\text{N}_6\text{O}_4\text{S}$  *MH* requires, 363.0870.

## 1-(4-Phenylpiperidin-1-yl)butane-1,3-dione

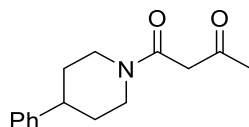

4-Phenylpiperidine (3.00 g, 18.6 mmol) was dissolved in toluene (200 mL) then 2,2,6-trimethyl-4*H*-1,3-dioxin-4-one (3.72 mL, 28.0 mmol) was added dropwise over 5 min and the resulting solution was stirred at rt for 15 min. The reaction mixture was stirred at 120  $^{\circ}\text{C}$  for a further 18 h then concentrated under reduced pressure to give a crude material. This was purified via column chromatography, eluting with EtOAc–hexane 50:50 to give *1,3-dicarbonyl derivative* (3.86 g, 85%, *keto:enol* 83:17 by  $^1\text{H}$  NMR) as a yellow oil.  $R_f$  0.38 (EtOAc).  $\nu_{\text{max}}/\text{cm}^{-1}$ : 3002, 2920, 2855, 1718, 1630, 1491, 1389, 1268, 1226, 1007;  $\delta_{\text{H}}$  (500 MHz,  $\text{CDCl}_3$ ): 15.00 (1H, s,  $\text{OH}^{\text{enol}}$ ), 7.34 (4H, t,  $J$  7.5 Hz,



phenyl 3,5-H), 7.27-7.20 (6H, m, phenyl 2,6-H and phenyl 4-H), 5.27 (1H, s, 2-H<sup>enol</sup>), 4.83-4.77 (2H, m, piperidiny 2-H<sub>A</sub> or piperidiny 6-H<sub>A</sub>), 3.88-3.82 (2H, m, piperidiny 2-H<sub>A</sub> or piperidiny 6-H<sub>A</sub>), 3.64 (2H, s, 2-H<sub>2</sub><sup>keto</sup>), 3.19 (2H, app. td, *J* 13.2 and 2.4 Hz, piperidiny 2-H<sub>B</sub> or piperidiny 6-H<sub>B</sub>), 2.82-2.74 (2H, m, piperidiny 4-H), 2.71 (2H, app. td, *J* 13.2 and 2.6 Hz, piperidiny 2-H<sub>B</sub> or piperidiny 6-H<sub>B</sub>), 2.32 (3H, s, 4-H<sub>3</sub><sup>keto</sup>), 2.00 (3H, s, 4-H<sub>3</sub><sup>enol</sup>), 1.96-1.90 (4H, m, piperidiny 3,5-H<sub>A</sub>), 1.68 (4H, app. pd, *J* 12.8 and 4.2 Hz, piperidiny 3,5-H<sub>B</sub>);  $\delta_C$  (125 MHz, CDCl<sub>3</sub>): 202.3 (C-3<sup>keto</sup>), 175.0 (C-3<sup>enol</sup>), 170.3 (C-1<sup>enol</sup>), 164.7 (C-1<sup>keto</sup>), 144.8 (phenyl C-1), 128.4 (phenyl C<sub>2</sub>-3,5), 126.6 (phenyl C<sub>2</sub>-2,6), 126.4 (phenyl C-4), 86.3 (C-2<sup>enol</sup>), 49.9 (C-2<sup>keto</sup>), 46.9 (piperidiny C<sub>A</sub>-2,6), 42.34 (piperidiny C<sub>B</sub>-2,6), 42.32 (piperidiny C-4), 33.4 (piperidiny C<sub>A</sub>-3,5), 32.6 (piperidiny C<sub>B</sub>-3,5), 30.1 (C-4<sup>keto</sup>), 21.9 (C-4<sup>enol</sup>); HRMS found MH<sup>+</sup> 246.1483. C<sub>15</sub>H<sub>19</sub>NO<sub>2</sub> requires *MH*, 246.1489.

## 2-Diazo-1-(4-phenylpiperidin-1-yl)butane-1,3-dione

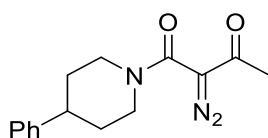

1-(4-Phenylpiperidin-1-yl)butane-1,3-dione (3.86 g, 15.6 mmol) and *p*-ABSA (4.15 g, 17.3 mmol) were dissolved in MeCN (80 mL) then Et<sub>3</sub>N (2.41 mL, 17.3 mmol) was added at rt. The resulting solution was stirred at rt for 24 h then filtered through Celite (eluting with EtOAc) to remove any solids. The filtrate was concentrated under reduced pressure to give a crude material. This was then purified via column chromatography, eluting EtOAc–hexane 30:70 to give the *diazo derivative* (3.46 g, 82%) as a yellow oil. *R*<sub>f</sub> 0.63 (EtOAc).  $\nu_{\max}/\text{cm}^{-1}$ : 3027, 2920, 2855, 2071, 1718, 1630, 1492, 1358, 1268, 1155, 1068;  $\delta_H$  (500 MHz, CDCl<sub>3</sub>): 7.34-7.30 (2H, m, phenyl 3,5-H), 7.25-7.20 (3H, m, phenyl 2,6-H and phenyl 4-H), 4.14 (2H, app. br. s, piperidiny 2,6-H<sub>A</sub>), 3.04 (2H, app. t, *J* 12.7 Hz, piperidiny 2,6-H<sub>B</sub>), 2.78 (1H, tt, *J* 12.2 and 3.6 Hz, piperidiny 4-H), 2.36 (3H, s, 4-H<sub>3</sub>), 1.97-1.91 (2H, m, piperidiny 3,5-H<sub>A</sub>), 1.74 (2H, qd, *J* 12.7 and 4.1 Hz, piperidiny 3,5-H<sub>B</sub>);  $\delta_C$  (125 MHz, CDCl<sub>3</sub>): 160.4 (C-1), 145.0 (phenyl C-1), 128.8 (phenyl C<sub>2</sub>-3,5), 126.9 (phenyl C<sub>2</sub>-2,6), 126.8 (phenyl C-4), 46.5 (piperidiny C<sub>2</sub>-2,6), 42.8 (piperidiny C-4), 33.3 (piperidiny C<sub>2</sub>-3,5), 27.3 (C-4); HRMS found MNa<sup>+</sup> 294.1212. C<sub>15</sub>H<sub>17</sub>N<sub>3</sub>O<sub>2</sub> requires *MNa*, 294.1213. C-2 and C-3 not observed by <sup>13</sup>C NMR (125 MHz).

**4-[1-Diazo-2-oxo-2-(4-phenylpiperidin-1-yl)ethyl]benzene-1-sulfonyl fluoride (D2)**

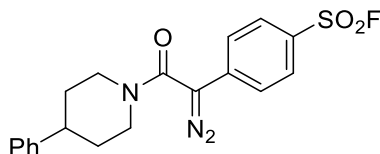

2-Diazo-1-(4-phenylpiperidin-1-yl)butane-1,3-dione (3.40 g, 12.5 mmol) was dissolved in MeCN (40 mL) then 10% aq. KOH (40 mL) was added and the resulting solution allowed to stir at rt for 18 h. EtOAc (80 mL) was added and the phases then separated. The aqueous phase was extracted with EtOAc (3 × 40 mL), organic phases combined, washed with sat. aq. ammonium chloride (40 mL), dried (MgSO<sub>4</sub>), filtered and concentrated under reduced pressure to give the deacetylate diazo intermediate (2.53 g, 87%) as a yellow oil. This intermediate (2.53 g, 10.9 mmol) was then dissolved in toluene (50 mL) and Pd(PPh<sub>3</sub>)<sub>4</sub> (485 mg, 5 mol %), Ag<sub>2</sub>CO<sub>3</sub> (1.16 g, 4.20 mmol), 4-iodobenzenesulfonyl fluoride (2.40 g, 8.39 mmol) and Et<sub>3</sub>N (1.52 mL, 10.9 mmol) were added and the resulting mixture allowed to stir at rt for 4 h. The mixture was filtered through Celite (eluting with EtOAc) and the filtrate concentrated under reduced pressure to give a crude material. This was purified via column chromatography, eluting EtOAc–hexane 20:80 to give the *sulfonyl fluoride diazo derivative D2* (1.72 g, 53%) as a yellow-orange solid. *R*<sub>f</sub> 0.66 (EtOAc–hexane 50:50). *ν*<sub>max</sub>/cm<sup>-1</sup>: 3060, 2953, 2876, 2069, 1627, 1455, 1396, 1367, 1296, 1264, 1158, 1068; *δ*<sub>H</sub> (500 MHz, CDCl<sub>3</sub>): 7.96 (2H, d, *J* 8.8 Hz, aryl 2,6-H), 7.46 (2H, d, *J* 8.8 Hz, aryl 3,5-H), 7.36-7.30 (2H, m, phenyl 3,5-H), 7.26-7.19 (3H, m, phenyl 2,6-H and phenyl 4-H), 4.20 (2H, app. br. d, *J* 13.2 Hz, piperidiny 2,6-H<sub>A</sub>), 3.06 (2H, td, *J* 13.2 and 2.4 Hz, piperidiny 2,6-H<sub>B</sub>), 2.80 (1H, tt, *J* 12.1 and 3.5 Hz, piperidiny 4-H), 1.97 (2H, app. br. d, *J* 13.9 Hz, piperidiny 3,5-H<sub>A</sub>), 1.71 (2H, app. qd, *J* 12.8 and 4.1 Hz, piperidiny 3,5-H<sub>B</sub>); *δ*<sub>C</sub> (125 MHz, CDCl<sub>3</sub>): 162.9 (oxoethyl C-2), 144.7 (phenyl C-1), 137.4 (aryl C-4), 129.3 (aryl C<sub>2</sub>-2,6), 128.8 (phenyl C<sub>2</sub>-3,5), 128.6 (d, *J* 24.9 Hz, aryl C-1), 126.9 (phenyl C-4), 126.8 (phenyl C<sub>2</sub>-2,6), 123.6 (aryl C<sub>2</sub>-3,5), 63.5 (oxoethyl C-1), 46.6 (piperidiny C<sub>2</sub>-2,6), 42.7 (piperidiny C-4), 33.3 (piperidiny C<sub>2</sub>-3,5); *δ*<sub>F</sub> (470 MHz, CDCl<sub>3</sub>): 66.8 (SO<sub>2</sub>F); HRMS found *MH*<sup>+</sup> 388.1115. C<sub>19</sub>H<sub>18</sub>FN<sub>3</sub>O<sub>3</sub>S requires *MH*, 388.1126.

### 1-(2,3-Dihydro-1*H*-isoindol-2-yl)butane-1,3-dione

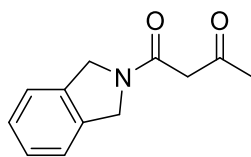

Isoindoline (1.00 g, 8.40 mmol) was dissolved in toluene (80 mL) then 2,2,6-trimethyl-4*H*-1,3-dioxin-4-one (1.67 mL, 12.6 mmol) was added dropwise over 5 min and the resulting solution was stirred at rt for 15 min. The reaction mixture was stirred at 120 °C for a further 18 h then concentrated under reduced pressure to give a crude material. This was purified via column chromatography, eluting EtOAc–hexane 50:50 → EtOAc to give *1,3-dicarbonyl derivative* (1.51 g, 88%, *keto:enol* 75:25 by <sup>1</sup>H NMR) as a dark brown solid. *R*<sub>f</sub> 0.38 (EtOAc).  $\nu_{\text{max}}/\text{cm}^{-1}$ : 3030, 2908, 2866, 1712, 1632, 1455, 1355, 1224, 1161;  $\delta_{\text{H}}$  (500 MHz, CDCl<sub>3</sub>): 14.58 (1H, s, OH<sup>enol</sup>), 7.35-7.19 (8H, m, isoindolyl 4,5,6,7-H), 5.10 (1H, s, 2-H<sup>enol</sup>), 4.81 (4H, s, isoindolyl 1,3-H<sub>2</sub><sup>keto</sup>), 4.74 (4H, s, isoindolyl 1,3-H<sub>2</sub><sup>enol</sup>), 3.60 (2H, s, 2-H<sub>2</sub><sup>keto</sup>), 2.34 (3H, s, 4-H<sub>3</sub><sup>keto</sup>), 1.99 (3H, s, 4-H<sub>3</sub><sup>enol</sup>);  $\delta_{\text{C}}$  (125 MHz, CDCl<sub>3</sub>): 202.2 (C-3<sup>keto</sup>), 175.0 (C-3<sup>enol</sup>), 170.7 (C-1<sup>enol</sup>), 165.4 (C-1<sup>keto</sup>), 136.3 (isoindolyl C<sub>A</sub>-3a,7a<sup>enol</sup>), 136.1 (isoindolyl C<sub>A</sub>-3a,7a<sup>keto</sup>), 136.0 (isoindolyl C<sub>B</sub>-3a,7a<sup>enol</sup>), 135.8 (isoindolyl C<sub>B</sub>-3a,7a<sup>keto</sup>), 128.0 (isoindolyl C<sub>A</sub>-5,6<sup>keto</sup>), 127.9 (isoindolyl C<sub>A</sub>-5,6<sup>enol</sup>), 127.7 (isoindolyl C<sub>B</sub>-5,6<sup>keto</sup>), 127.6 (isoindolyl C<sub>B</sub>-5,6<sup>enol</sup>), 123.1 (isoindolyl C<sub>2</sub>-4,7<sup>keto</sup>), 122.7 (isoindolyl C<sub>2</sub>-4,7<sup>enol</sup>), 88.5 (C-2<sup>enol</sup>), 53.1 (isoindolyl C<sub>A</sub>-1,3<sup>keto</sup>), 52.4 (isoindolyl C<sub>B</sub>-1,3<sup>keto</sup>), 52.2 (isoindolyl C<sub>A</sub>-1,3<sup>enol</sup>), 51.4 (isoindolyl C<sub>B</sub>-1,3<sup>enol</sup>), 51.1 (C-2<sup>keto</sup>), 30.5 (C-4<sup>keto</sup>), 21.9 (C-4<sup>enol</sup>); HRMS found MNa<sup>+</sup> 226.0852. C<sub>12</sub>H<sub>13</sub>NO<sub>2</sub> requires MNa, 226.0838.

### 2-Diazo-1-(2,3-dihydro-1*H*-isoindol-2-yl)butane-1,3-dione

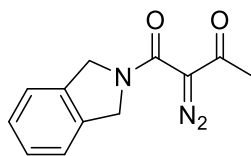

1-(2,3-Dihydro-1*H*-isoindol-2-yl)butane-1,3-dione (1.50 g, 7.39 mmol) and *p*-ABSA (1.95 g, 8.13 mmol) were dissolved in MeCN (40 mL) then Et<sub>3</sub>N (1.13 mL, 8.13 mmol) was added at rt. The resulting solution was at rt for 24 h then filtered through Celite (eluting with EtOAc) to remove any solids. The filtrate was concentrated under reduced

pressure to give a crude material. This was then purified via column chromatography, eluting EtOAc–hexane 30:70 to give the *diazo derivative* (1.46 g, 86%) as a pale-yellow oil.  $R_f$  0.62 (EtOAc).  $\nu_{\max}/\text{cm}^{-1}$ : 3033, 2930, 2866, 2094, 1650, 1612, 1400, 1355, 1232, 1088;  $\delta_{\text{H}}$  (400 MHz,  $\text{CDCl}_3$ ): 7.31–7.20 (4H, m, isoindolyl 4,5,6,7-H), 4.84 (4H, s, isoindolyl 1,3-H<sub>2</sub>), 2.40 (3H, s, 4-H<sub>3</sub>);  $\delta_{\text{C}}$  (100 MHz,  $\text{CDCl}_3$ ): 190.0 (C-3), 159.9 (C-1), 153.7 (isoindolyl C<sub>2</sub>-3a,7a), 127.9 (isoindolyl C<sub>2</sub>-5,6), 122.7 (isoindolyl C<sub>2</sub>-4,7), 73.7 (C-2), 53.3 (isoindolyl C<sub>2</sub>-1,3), 27.9 (C-4); HRMS found  $\text{MNa}^+$  252.0748.  $\text{C}_{12}\text{H}_{11}\text{N}_3\text{O}_2$  requires  $\text{MNa}$ , 252.0743.

#### 4-[1-Diazo-2-(2,3-dihydro-1*H*-isoindol-2-yl)-2-oxoethyl]benzene-1-sulfonyl fluoride (D3)

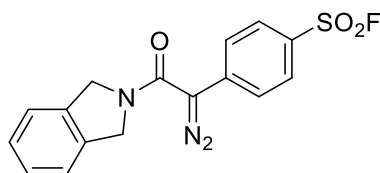

2-Diazo-1-(2,3-dihydro-1*H*-isoindol-2-yl)butane-1,3-dione (1.40 g, 6.11 mmol) was dissolved in MeCN (20 mL) then 10% aq. KOH (20 mL) was added and the resulting solution allowed to stir at rt for 18 h. EtOAc (40 mL) was added and the phases then separated. The aqueous phase was extracted with EtOAc (3 × 30 mL), organic phases combined, washed with sat. aq. ammonium chloride (40 mL), dried ( $\text{MgSO}_4$ ), filtered and concentrated under reduced pressure to give the deacetylated diazo intermediate (1.15 g, 99%) as a yellow oil. This intermediate (1.15 g, 6.05 mmol) was then dissolved in toluene (30 mL) and  $\text{Pd}(\text{PPh}_3)_4$  (269 mg, 5 mol %),  $\text{Ag}_2\text{CO}_3$  (643 mg, 2.33 mmol), 4-iodobenzenesulfonyl fluoride (1.33 g, 4.66 mmol) and  $\text{Et}_3\text{N}$  (0.84 mL, 6.05 mmol) were added and the resulting mixture allowed to stir at rt for 4 h. The mixture was filtered through Celite (eluting with EtOAc) and the filtrate concentrated under reduced pressure to give a crude material. This was purified via column chromatography, eluting EtOAc–hexane 15:85 to give the *sulfonyl fluoride diazo derivative D3* (0.26 g, 12%) as a yellow solid.  $R_f$  0.19 (EtOAc–hexane 15:85).  $\nu_{\max}/\text{cm}^{-1}$ : 3047, 2857, 2074, 1625, 1585, 1393, 1230, 1210, 1184;  $\delta_{\text{H}}$  (500 MHz,  $\text{CDCl}_3$ ): 7.98 (2H, d,  $J$  8.8 Hz, aryl 2,6-H), 7.60 (2H, d,  $J$  8.8 Hz, aryl 3,5-H), 7.36–7.28 (4H, m, isoindolyl 4,5,6,7-H), 4.91 (4H, s, isoindolyl 1,3-H<sub>2</sub>);  $\delta_{\text{C}}$  (125 MHz,  $\text{CDCl}_3$ ): 161.9 (oxoethyl C-2), 136.7 (aryl C-4), 135.7 (isoindolyl C<sub>2</sub>-3a,7a), 129.3 (aryl C<sub>2</sub>-2,6), 129.0 (d,  $J$  25.0 Hz, aryl C-1), 128.2

(isoindolyl C<sub>2</sub>-5,6), 124.3 (aryl C<sub>2</sub>-3,5), 122.9 (isoindolyl C<sub>2</sub>-4,7), 63.5 (oxoethyl C-1), 53.6 (isoindolyl C<sub>2</sub>-1,3);  $\delta_F$  (470 MHz, CDCl<sub>3</sub>): 66.7 (SO<sub>2</sub>F); HRMS found MNa<sup>+</sup> 368.0470. C<sub>16</sub>H<sub>12</sub>FN<sub>3</sub>O<sub>3</sub>S requires MNa, 368.0476.

**4-[(1*R*\*,1*aS*\*,6*aS*\*)-1-(4-Phenylpiperidine-1-carbonyl)-1*H*,1*aH*,6*H*,6*aH*-cyclopropa[*a*]inden-1-yl]benzene-1-sulfonyl fluoride (2-7)**

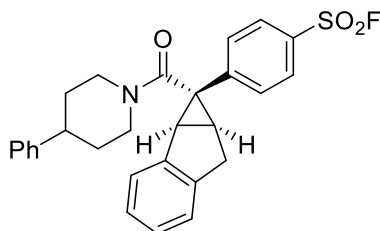

Prepared according to general procedure A – implementation of reaction array, diazo substrate **D2** (100 mM), co-substrate **C7** (500 mM) and Rh<sub>2</sub>(piv)<sub>4</sub> (1 mM) gave a crude material. This was then purified via preparative HPLC eluting with gradient elution: 5:95 → 55:45 → 75:25 → 95:5 MeCN–H<sub>2</sub>O to give the *cyclopropane derivative* **2-7** (1.20 mg, 13%, *dr* >95:<5 by <sup>1</sup>H NMR) as a colourless oil. *R*<sub>f</sub> 0.49 (EtOAc–hexane 50:50).  $\nu_{\max}/\text{cm}^{-1}$ : 2924, 2854, 1634, 1432, 1409, 1236, 1213, 1100;  $\delta_H$  (500 MHz, CDCl<sub>3</sub>, some peak broadening due to unresolved rotamers): 7.68 (2H, d, *J* 8.6 Hz, aryl 2,6-H), 7.50–7.44 (1H, m, indenyl 2-H), 7.35–7.23 (4H, m, aryl 3,5-H and phenyl 3,5-H), 7.23–7.16 (2H, m, phenyl 4-H and indenyl 3-H), 7.18–6.90 (3H, m, phenyl 2,6-H and indenyl 4-H), 6.85 (1H, d, *J* 7.5 Hz, indenyl 5-H), 4.70–4.55 (2H, m, piperidiny 2,6-H<sub>A</sub>), 3.30–3.22 (2H, m, indenyl 1a-H and indenyl 6a-H), 2.96 (1H, app. t, *J* 6.8 Hz, indenyl 6a-H), 2.90–2.60 (3H, m, piperidiny 2,6-H<sub>B</sub> and piperidiny 4-H), 2.49 (1H, d, *J* 17.9 Hz, indenyl 6-H<sub>B</sub>), 2.08–1.50 (4H, br. m, piperidiny 3,5-H<sub>2</sub>);  $\delta_C$  (125 MHz, CDCl<sub>3</sub>): 169.0 (C=O), 144.8 (aryl C-4 and phenyl C-1), 143.4 (indenyl C-5a), 141.0 (indenyl C-1b), 131.8 (aryl C<sub>2</sub>-3,5), 131.0 (d, *J* 24.6 Hz, aryl C-1), 128.8 (phenyl C<sub>2</sub>-3,5), 128.0 (aryl C<sub>2</sub>-2,6), 127.4 (indenyl C-4), 127.0 (indenyl C-3), 126.8 (phenyl C-4), 126.7 (phenyl C<sub>2</sub>-2,6), 125.2 (indenyl C-5), 124.5 (indenyl C-2), 42.6 (piperidiny C-4), 40.1 (C-1), 37.1 (indenyl C-1a), 32.9 (indenyl C-6), 32.8 (piperidiny C<sub>2</sub>-3,5), 29.6 (indenyl C-6a);  $\delta_F$  (470 MHz, CDCl<sub>3</sub>): 65.9 (SO<sub>2</sub>F); HRMS found MH<sup>+</sup> 476.1683. C<sub>28</sub>H<sub>26</sub>FN<sub>3</sub>O<sub>3</sub>S requires MH, 476.1690. Piperidiny C<sub>2</sub>-2,6 not observed by <sup>13</sup>C NMR (125 MHz). The relative configuration was determined though NOESY (500 MHz). nOe observed between indenyl 6-H<sub>B</sub> and aryl 3,5-H and nOe observed between indenyl 1a-H and indenyl 6a-H.

**4-[2-Oxo-2-(4-phenylpiperidin-1-yl)-1-[(pyrimidin-2-yl)amino]ethyl]benzene-1-sulfonyl fluoride (2-13)**

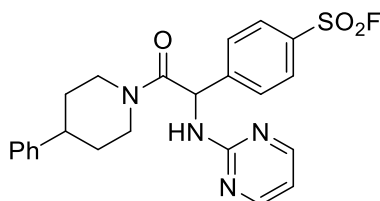

Prepared according to general procedure A – implementation of reaction array, diazo substrate **D2** (100 mM), co-substrate **C13** (500 mM) and  $\text{Rh}_2(\text{piv})_4$  (1 mM) gave a crude material. This was then purified via preparative HPLC eluting with gradient elution: 5:95  $\rightarrow$  55:45  $\rightarrow$  75:25  $\rightarrow$  95:5 MeCN–H<sub>2</sub>O to give the *aminopyrimidine derivative* **2-13** (1.10 mg, 12%, *rotamers* 52:48 by <sup>1</sup>H NMR) as a colourless oil. *R*<sub>f</sub> 0.10 (EtOAc–hexane 50:50).  $\nu_{\text{max}}/\text{cm}^{-1}$ : 3225, 3030, 2924, 2854, 1639, 1581, 1507, 1447, 1210, 1098;  $\delta_{\text{H}}$  (500 MHz, CDCl<sub>3</sub>): 8.27 (4H, t, *J* 4.7 Hz, pyrimidinyl 4,6-H), 8.02 (2H, d, *J* 8.3 Hz, aryl 2,6-H<sup>min</sup>), 7.98 (2H, d, *J* 8.3 Hz, aryl 2,6-H<sup>maj</sup>), 7.89 (2H, d, *J* 8.3 Hz, aryl 3,5-H<sup>min</sup>), 7.81 (2H, d, *J* 8.3 Hz, aryl 3,5-H<sup>maj</sup>), 7.31 (2H, t, *J* 7.5 Hz, phenyl 3,5-H<sup>maj</sup>), 7.28–7.15 (6H, m, phenyl 3,5-H<sup>min</sup>, phenyl 2,6-H<sup>maj</sup> and phenyl 4-H), 6.97 (2H, d, *J* 7.5 Hz, phenyl 2,6-H<sup>min</sup>), 6.85 (1H, d, *J* 7.5 Hz, NH<sup>min</sup>), 6.82 (1H, d, *J* 6.8 Hz, NH<sup>maj</sup>), 6.58 (2H, app. q, *J* 4.7 Hz, pyrimidinyl 5-H), 6.13 (2H, app. t, *J* 7.5 Hz, 1-H), 4.81 (2H, app. d, *J* 13.1 Hz, piperidinyl 2-H<sub>A</sub> or piperidinyl 6-H<sub>A</sub>) 4.07 (2H, app. t, *J* 13.1 Hz, piperidinyl 2-H<sub>A</sub> or piperidinyl 6-H<sub>A</sub>), 3.22 (2H, app. t, *J* 12.0 Hz, piperidinyl 2-H<sub>B</sub><sup>min</sup> or piperidinyl 6-H<sub>B</sub><sup>min</sup>), 2.90 (2H, app. t, *J* 12.0 Hz, piperidinyl 2-H<sub>B</sub><sup>min</sup> or piperidinyl 6-H<sub>B</sub><sup>min</sup>), 2.80–2.64 (4H, m, piperidinyl 2,6-H<sub>B</sub><sup>maj</sup> and piperidinyl 4-H), 1.96–1.64 (6H, m, piperidinyl 3,5-H<sub>A</sub> and piperidinyl 3,5-H<sub>B</sub><sup>min</sup>), 1.42 (2H, qd, *J* 12.7 and 4.1 Hz, piperidinyl 3-H<sub>B</sub><sup>maj</sup> or piperidinyl 5-H<sub>B</sub><sup>maj</sup>), 0.71 (2H, qd, *J* 12.7 and 4.1 Hz, piperidinyl 3-H<sub>B</sub><sup>maj</sup> or piperidinyl 5-H<sub>B</sub><sup>maj</sup>);  $\delta_{\text{C}}$  (125 MHz, CDCl<sub>3</sub>): 167.5 (C-2<sup>maj</sup>), 167.4 (C-2<sup>min</sup>), 160.7 (pyrimidinyl C-2<sup>min</sup>), 160.6 (pyrimidinyl C-2<sup>maj</sup>), 158.2 (pyrimidinyl C<sub>2</sub>-4,6), 147.5 (phenyl C-1<sup>min</sup>), 147.0 (phenyl C-1<sup>maj</sup>), 144.7 (aryl C-4<sup>min</sup>), 144.4 (aryl C-4<sup>maj</sup>), 132.6 (d, *J* 24.9 Hz, aryl C-1), 129.6 (aryl C<sub>2</sub>-3,5<sup>min</sup>), 129.4 (aryl C<sub>2</sub>-3,5<sup>maj</sup>), 129.1 (phenyl C<sub>2</sub>-3,5<sup>min</sup>), 129.0 (phenyl C<sub>2</sub>-3,5<sup>maj</sup>), 128.8 (aryl C<sub>2</sub>-2,6), 126.9 (phenyl C-4), 126.8 (phenyl C<sub>2</sub>-2,6<sup>maj</sup>), 126.6 (phenyl C<sub>2</sub>-2,6<sup>min</sup>), 111.9 (pyrimidinyl C-5<sup>min</sup>), 111.8 (pyrimidinyl C-5<sup>maj</sup>), 54.8 (C-1<sup>maj</sup>), 54.7 (C-1<sup>min</sup>), 46.5 (piperidinyl C<sub>A</sub>-2,6<sup>maj</sup>), 46.2 (piperidinyl C<sub>B</sub>-2,6<sup>maj</sup>), 43.7 (piperidinyl C<sub>A</sub>-2,6<sup>min</sup>), 43.6 (piperidinyl C<sub>B</sub>-2,6<sup>min</sup>), 42.7 (piperidinyl C-4<sup>maj</sup>), 42.3 (piperidinyl C-4<sup>min</sup>), 33.9 (piperidinyl C<sub>A</sub>-3,5<sup>maj</sup>), 32.9 (piperidinyl C<sub>B</sub>-3,5<sup>maj</sup>),

32.8 (piperidinyll  $C_{A-3,5}^{min}$ ), 32.7 (piperidinyll  $C_{B-3,5}^{min}$ );  $\delta_F$  (470 MHz,  $CDCl_3$ ): 66.2 ( $SO_2F^{min}$ ), 66.0 ( $SO_2F^{maj}$ ); HRMS found  $MH^+$  455.1552.  $C_{23}H_{23}FN_4O_3S$  requires  $MH$ , 455.1548.

**4-{1-[(2-Bromophenyl)methoxy]-2-(2,3-dihydro-1*H*-isoindol-2-yl)-2-oxoethyl}benzene-1-sulfonyl fluoride (3-2)**

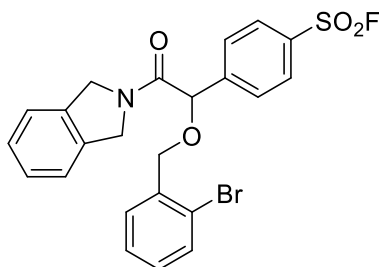

Prepared according to general procedure A – implementation of reaction array, diazo substrate **D3** (100 mM), co-substrate **C2** (500 mM) and  $Rh_2(piv)_4$  (1 mM) gave a crude material. This was then purified via preparative HPLC eluting with gradient elution: 5:95  $\rightarrow$  55:45  $\rightarrow$  75:25  $\rightarrow$  95:5 MeCN– $H_2O$  to give the *ether derivative* **3-2** (1.30 mg, 13%) as a colourless oil.  $R_f$  0.63 (EtOAc–hexane 50:50).  $\nu_{max}/cm^{-1}$ : 2920, 2874, 1650, 1412, 1213, 1096;  $\delta_H$  (500 MHz,  $CDCl_3$ ): 8.30 (2H, d,  $J$  8.6 Hz, aryl 2,6-H), 7.85 (2H, d,  $J$  8.6 Hz, aryl 3,5-H), 7.58 (1H, dd,  $J$  7.6 and 1.1 Hz, bromophenyl 3-H), 7.52 (1H, dd,  $J$  7.6 and 1.5 Hz, bromophenyl 6-H), 7.35 (1H, td,  $J$  7.6 and 1.1 Hz, bromophenyl 5-H), 7.29–7.24 (3H, m, isoindolyl 5,6-H and isoindolyl 4-H or isoindolyl 7-H), 7.21 (1H, td,  $J$  7.6 and 1.5 Hz, bromophenyl 4-H), 7.16 (1H, d,  $J$  6.8 Hz, isoindolyl 4-H or isoindolyl 7-H), 5.39 (1H, s, 1-H), 4.92 (2H, d,  $J$  15.2 Hz, isoindolyl 1,3- $H_A$ ), 4.87–4.80 (2H, m, bromophenylmethoxy 1- $H_A$  and isoindolyl 1- $H_B$  or isoindolyl 3- $H_B$ ), 4.76 (1H, d,  $J$  12.2 Hz, bromophenylmethoxy 1- $H_B$ ), 4.58 (1H, d,  $J$  15.2 Hz, isoindolyl 1- $H_B$  or isoindolyl 3- $H_B$ );  $\delta_C$  (125 MHz,  $CDCl_3$ ): 167.8 (C-2), 144.4 (aryl C-4), 136.2 (isoindolyl  $C_{A-3a,7a}$ ), 136.0 (isoindolyl  $C_{B-3a,7a}$ ), 135.3 (bromophenyl C-1), 133.1 (bromophenyl C-3), 133.0 (d,  $J$  24.9 Hz, aryl C-1), 130.2 (bromophenyl C-6), 130.1 (bromophenyl C-4), 129.0 (aryl  $C_{2-2,6}$ ), 128.1 (aryl  $C_{2-3,5}$ ), 127.8 (bromophenyl C-5 and isoindolyl  $C_{2-5,6}$ ), 123.6 (bromophenyl C-2), 123.0 (isoindolyl  $C_{A-4,7}$ ), 122.7 (isoindolyl  $C_{B-4,7}$ ), 81.1 (C-1), 72.0 (bromophenylmethoxy C-1), 53.5 (isoindolyl  $C_{A-1,3}$ ), 51.9 (isoindolyl  $C_{B-1,3}$ );  $\delta_F$  (470 MHz,  $CDCl_3$ ): 66.1 ( $SO_2F$ ); HRMS found  $MH^+$  504.0267.  $C_{23}H_{19}BrFNO_4S$  requires  $MH$ , 504.0275.

**4-{1-[3-(2-Hydroxyethyl)-1*H*-indol-1-yl]-2-(morpholin-4-yl)-2-oxoethyl}benzene-1-sulfonyl fluoride (1-3a) and 4-{1-[2-(1*H*-Indol-3-yl)ethoxy]-2-(morpholin-4-yl)-2-oxoethyl}benzene-1-sulfonyl fluoride (1-3b)**

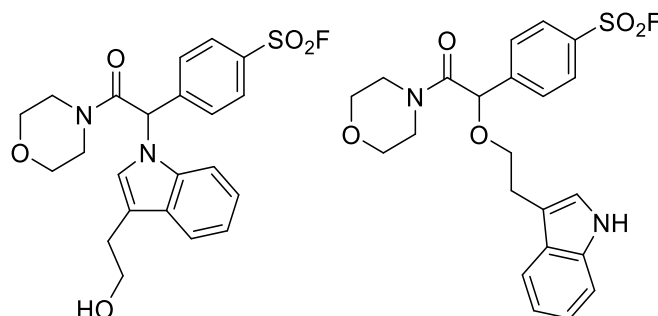

Prepared according to general procedure A – implementation of reaction array, diazo substrate **D1** (100 mM), co-substrate **C3** (500 mM) and Rh<sub>2</sub>(pfb)<sub>4</sub> (1 mM) gave a crude material. This was then purified via preparative HPLC eluting with gradient elution: 5:95 → 35:65 → 60:40 → 95:5 MeCN–H<sub>2</sub>O to give the *indole derivative* **1-3a** (1.30 mg, 15%) as a colourless oil. *R*<sub>f</sub> 0.05 (EtOAc–hexane 50:50). *v*<sub>max</sub>/cm<sup>-1</sup>: 3433, 2925, 2858, 1651, 1459, 1410, 1213, 1115, 1035; δ<sub>H</sub> (500 MHz, CDCl<sub>3</sub>): 7.96 (2H, d, *J* 8.5 Hz, aryl 2,6-H), 7.69–7.67 (1H, m, indolyl 4-H), 7.31 (2H, d, *J* 8.5 Hz, aryl 3,5-H), 7.24–7.14 (3H, m, indolyl 5,6,7-H), 7.09 (1H, s, indolyl 2-H), 6.40 (1H, s, 1-H), 3.94 (2H, t, *J* 6.0 Hz, hydroxyethyl 2-H<sub>2</sub>), 3.90–3.84 (1H, m, morpholinyl 3-H<sub>A</sub> or morpholinyl 5-H<sub>A</sub>), 3.78–3.71 (1H, m, morpholinyl 2-H<sub>A</sub> or morpholinyl 6-H<sub>A</sub>), 3.68–3.55 (2H, m, morpholinyl 3,5-H<sub>B</sub> and morpholinyl 2,6-H<sub>B</sub>), 3.48 (1H, ddd, *J* 11.4, 6.0 and 2.9 Hz, morpholinyl 2-H<sub>A</sub> or morpholinyl 6-H<sub>A</sub>), 3.42–3.34 (1H, m, morpholinyl 3-H<sub>A</sub> or morpholinyl 5-H<sub>B</sub>), 3.27–3.17 (2H, m, morpholinyl 2,6-H<sub>B</sub> and morpholinyl 3,5-H<sub>B</sub>), 3.06 (2H, t, *J* 6.0 Hz, hydroxyethyl 1-H<sub>2</sub>), 1.45 (1H, br. s, OH); δ<sub>C</sub> (125 MHz, CDCl<sub>3</sub>): 165.8 (C-2), 145.0 (aryl C-4), 136.1 (indolyl C-7a), 133.0 (d, *J* 25.0 Hz, aryl C-1), 128.93 (aryl C<sub>2</sub>-2,6), 128.88 (aryl C<sub>2</sub>-3,5), 128.7 (indolyl C-3a), 124.3 (indolyl C-2), 123.3 (indolyl C-6), 120.8 (indolyl C-5), 120.0 (indolyl C-4), 114.4 (indolyl C-3), 108.9 (indolyl C-7), 66.9 (morpholinyl C<sub>A</sub>-2,6), 66.3 (morpholinyl C<sub>B</sub>-2,6), 62.8 (hydroxyethyl C-2), 59.7 (C-1), 46.4 (morpholinyl C<sub>A</sub>-3,5), 43.3 (morpholinyl C<sub>B</sub>-3,5), 28.8 (hydroxyethyl C-1); δ<sub>F</sub> (470 MHz, CDCl<sub>3</sub>): 66.0 (SO<sub>2</sub>F); HRMS found MH<sup>+</sup> 447.1381. C<sub>22</sub>H<sub>23</sub>FN<sub>2</sub>O<sub>5</sub>S requires *MH*, 447.1384.

Also obtained was the *indole derivative* **1-3b** (0.10 mg, 1%) as a colourless oil. *R*<sub>f</sub> 0.10 (EtOAc–hexane 50:50). *v*<sub>max</sub>/cm<sup>-1</sup>: 3432, 2921, 2855, 1651, 1459, 1412, 1213, 1114,



1036;  $\delta_{\text{H}}$  (500 MHz,  $\text{CDCl}_3$ ): 8.03 (1H, br. s, NH), 7.96 (2H, d,  $J$  8.6 Hz, aryl 2,6-H), 7.65-7.59 (3H, m, aryl 3,5-H and indolyl 4-H), 7.39 (1H, dt,  $J$  8.2 and 0.9 Hz, indolyl 7-H), 7.24-7.20 (1H, m, indolyl 6-H), 7.13 (1H, ddd,  $J$  8.2, 7.0 and 1.0 Hz, indolyl 5-H), 7.08 (1H, d,  $J$  2.3 Hz, indolyl 2-H), 5.25 (1H, s, 1-H), 3.98 (1H, dt,  $J$  8.9 and 6.7 Hz, ethoxyindolyl 2-H<sub>A</sub>), 3.91 (1H, dt,  $J$  8.9 and 6.1 Hz, ethoxyindolyl 2-H<sub>B</sub>), 3.59-3.43 (4H, m, morpholinyl 2-H<sub>2</sub> or morpholinyl 6-H<sub>2</sub> and morpholinyl 3-H<sub>2</sub> or morpholinyl 5-H<sub>2</sub>), 3.31-2.94 (6H, m, morpholinyl 2-H<sub>2</sub> or morpholinyl 6-H<sub>2</sub>, morpholinyl 3-H<sub>2</sub> or morpholinyl 5-H<sub>2</sub> and ethoxyindolyl 1-H<sub>2</sub>);  $\delta_{\text{C}}$  (125 MHz,  $\text{CDCl}_3$ ): 167.7 (C-2), 145.3 (aryl C-4), 136.2 (indolyl C-7a), 128.8 (aryl C<sub>2</sub>-2,6), 127.0 (aryl C<sub>2</sub>-3,5), 122.4 (indolyl C-6), 122.2 (indolyl C-2), 120.7 (indolyl C-3a), 119.6 (indolyl C-5), 118.8 (indolyl C-4), 112.8 (indolyl C-3), 111.4 (indolyl C-7), 83.0 (C-1), 71.4 (ethoxyindolyl C-2), 66.8 (morpholinyl C<sub>A</sub>-2,6), 66.2 (morpholinyl C<sub>B</sub>-2,6), 45.4 (morpholinyl C<sub>A</sub>-3,5), 42.8 (morpholinyl C<sub>B</sub>-3,5), 26.0 (ethoxyindolyl C-1);  $\delta_{\text{F}}$  (470 MHz,  $\text{CDCl}_3$ ): 66.1 ( $\text{SO}_2\text{F}$ ); HRMS found  $\text{MNa}^+$  469.1204.  $\text{C}_{22}\text{H}_{23}\text{FN}_2\text{O}_5\text{S}$  requires  $\text{MNa}$ , 469.1204. Aryl C-1 not observed by  $^{13}\text{C}$  NMR.

#### 4-{1-[(2-Chloro-5-fluorophenyl)methoxy]-2-(morpholin-4-yl)-2-oxoethyl}benzene-1-sulfonyl fluoride (1-5)

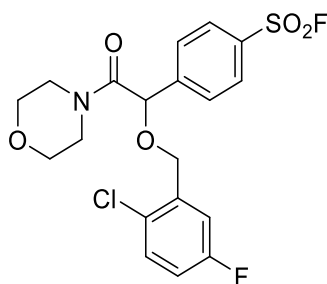

Prepared according to general procedure A – implementation of reaction array, diazo substrate **D1** (100 mM), co-substrate **C5** (500 mM) and  $\text{Rh}_2(\text{pfb})_4$  (1 mM) gave a crude material. This was then purified via preparative HPLC eluting with gradient elution: 5:95  $\rightarrow$  35:65  $\rightarrow$  60:40  $\rightarrow$  95:5 MeCN– $\text{H}_2\text{O}$  to give the *ether derivative* **1-5** (1.00 mg, 11%) as a colourless oil.  $R_{\text{f}}$  0.34 (EtOAc–hexane 50:50).  $\nu_{\text{max}}/\text{cm}^{-1}$ : 2964, 2925, 2857, 1650, 1412, 1301, 1213, 1115;  $\delta_{\text{H}}$  (500 MHz,  $\text{CDCl}_3$ ): 8.05 (2H, d,  $J$  8.6 Hz, aryl 2,6-H), 7.75 (2H, d,  $J$  8.6 Hz, aryl 3,5-H), 7.37 (1H, dd,  $J$  8.8 and 5.0 Hz, chlorophenyl 3-H), 7.23 (1H, dd,  $J$  8.8 and 3.0 Hz, chlorophenyl 6-H), 7.04-7.00 (1H, m, chlorophenyl 4-H), 5.41 (1H, s, 1-H), 4.81 (1H, d,  $J$  12.7 Hz, chlorophenylmethoxy 1-H<sub>A</sub>), 4.73 (1H,

d,  $J$  12.7 Hz, chlorophenylmethoxy 1-H<sub>B</sub>), 3.69-3.60 (4H, m, morpholinyl 2-H<sub>2</sub> or morpholinyl 6-H<sub>2</sub> and morpholinyl 3-H<sub>2</sub> or morpholinyl 5-H<sub>2</sub>), 3.59-3.51 (1H, m, morpholinyl 3-H<sub>A</sub> or morpholinyl 5-H<sub>A</sub>), 3.49-3.42 (1H, m, morpholinyl 2-H<sub>A</sub> or morpholinyl 6-H<sub>A</sub>), 3.40-3.29 (2H, m, morpholinyl 3-H<sub>B</sub> or morpholinyl 5-H<sub>B</sub> and morpholinyl 2-H<sub>B</sub> or morpholinyl 6-H<sub>B</sub>);  $\delta_C$  (125 MHz, CDCl<sub>3</sub>): 167.2 (C-2), 161.6 (d,  $J$  247.4 Hz, chlorophenyl C-5), 144.7 (aryl C-4), 136.4 (d,  $J$  7.5 Hz, chlorophenyl C-1), 133.1 (d,  $J$  25.1 Hz, aryl C-1), 131.1 (d,  $J$  8.2 Hz, chlorophenyl C-3), 129.1 (aryl C<sub>2</sub>-2,6), 127.9 (d,  $J$  3.3 Hz, chlorophenyl C-2), 127.3 (aryl C<sub>2</sub>-3,5), 116.7 (d,  $J$  22.8 Hz, chlorophenyl C-4), 116.4 (d,  $J$  24.1 Hz, chlorophenyl C-6), 82.3 (C-1), 69.5 (chlorophenylmethoxy C-1), 66.9 (morpholinyl C<sub>A</sub>-2,6), 66.5 (morpholinyl C<sub>B</sub>-2,6), 45.9 (morpholinyl C<sub>A</sub>-3,5), 43.1 (morpholinyl C<sub>B</sub>-3,5);  $\delta_F$  (470 MHz, CDCl<sub>3</sub>): 66.1 (SO<sub>2</sub>F), -114.1 (chlorophenyl CF); HRMS found MNa<sup>+</sup> 468.0457. C<sub>19</sub>H<sub>18</sub>ClF<sub>2</sub>NO<sub>5</sub>S requires MNa, 468.0454.

**4-{1-[3-(2-Hydroxyethyl)-1*H*-indol-1-yl]-2-oxo-2-(4-phenylpiperidin-1-yl)ethyl}benzene-1-sulfonyl fluoride (2-3a) and 4-{1-[2-(1*H*-indol-3-yl)ethoxy]-2-oxo-2-(4-phenylpiperidin-1-yl)ethyl}benzene-1-sulfonyl fluoride (2-3b)**

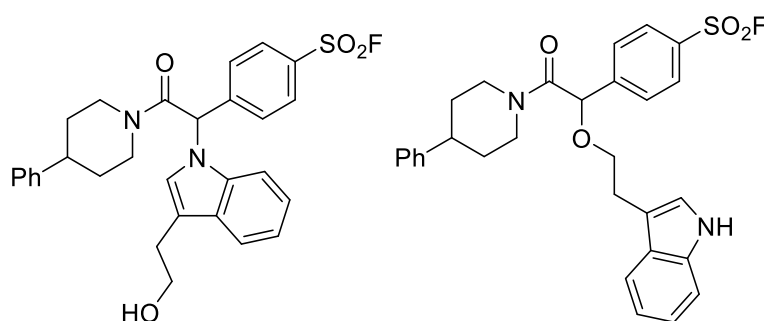

Prepared according to general procedure A – implementation of reaction array, diazo substrate **D2** (100 mM), co-substrate **C3** (500 mM) and Rh<sub>2</sub>(pfb)<sub>4</sub> (1 mM) gave a crude material. This was then purified via preparative HPLC eluting with gradient elution: 5:95 → 55:45 → 75:25 → 95:5 MeCN–H<sub>2</sub>O to give the *indole derivative* **2-3a** (1.40 mg, 13%, *rotamers* 38:62 by <sup>1</sup>H NMR) as a colourless oil.  $R_f$  0.16 (EtOAc–hexane 50:50).  $\nu_{\max}/\text{cm}^{-1}$ : 3434, 3060, 2924, 2856, 1645, 1458, 1410, 1212, 1099;  $\delta_H$  (500 MHz, CDCl<sub>3</sub>): 7.98 (2H, d,  $J$  8.6 Hz, aryl 2,6-H<sup>min</sup>), 7.95 (2H, d,  $J$  8.6 Hz, aryl 2,6-H<sup>maj</sup>), 7.69-7.66 (2H, m, indolyl 4-H), 7.37 (2H, d,  $J$  8.6 Hz, aryl 3,5-H<sup>min</sup>), 7.34-7.30 (4H, m, aryl 3,5-H<sup>maj</sup> and phenyl 4-H), 7.26-7.14 (14H, m, phenyl 2,6-H<sup>min</sup>, phenyl 3,5-H, indolyl

2,5,6,7-H), 6.96-6.93 (2H, m, phenyl 2,6-H<sup>maj</sup>), 6.51 (1H, s, 1-H<sup>min</sup>), 6.50 (1H, s, 1-H<sup>maj</sup>), 4.89-4.78 (2H, m, piperidiny 2-H<sub>A</sub> or piperidiny 6-H<sub>A</sub>), 3.93 (4H, q, *J* 6.6 Hz, hydroxyethyl 2-H<sub>2</sub>), 3.86-3.76 (2H, m, piperidiny 2-H<sub>A</sub> or piperidiny 6-H<sub>A</sub>), 3.18 (1H, td, *J* 13.1 and 2.6 Hz, piperidiny 2-H<sub>B</sub><sup>maj</sup> or piperidiny 6-H<sub>B</sub><sup>maj</sup>), 3.09-3.03 (4H, m, hydroxyethyl 1-H<sub>2</sub>), 2.99-2.93 (1H, m, piperidiny 2-H<sub>B</sub><sup>min</sup> or piperidiny 6-H<sub>B</sub><sup>min</sup>), 2.86-2.60 (4H, m, piperidiny 2-H<sub>B</sub> or piperidiny 6-H<sub>B</sub> and piperidiny 4-H), 2.03-1.97 (1H, m, piperidiny 3-H<sub>A</sub><sup>min</sup> or piperidiny 5-H<sub>A</sub><sup>min</sup>), 1.93-1.88 (2H, m, piperidiny 3-H<sub>B</sub> or piperidiny 5-H<sub>B</sub>), 1.71 (1H, qd, *J* 12.8 and 4.2 Hz, piperidiny 3-H<sub>A</sub><sup>maj</sup> or piperidiny 5-H<sub>A</sub><sup>maj</sup>), 1.55-1.45 (5H, m, piperidiny 3-H<sub>A</sub> or piperidiny 5-H<sub>A</sub>, piperidiny 3-H<sub>B</sub> or piperidiny 5-H<sub>B</sub> and piperidiny 3,5-H<sub>B</sub><sup>min</sup>), 1.42 (2H, s, OH), 0.76 (1H, qd, *J* 12.8 and 4.2 Hz, piperidiny 3-H<sub>B</sub><sup>maj</sup> or piperidiny 5-H<sub>B</sub><sup>maj</sup>);  $\delta_c$  (125 MHz, CDCl<sub>3</sub>): 165.7 (C-2<sup>min</sup>), 165.4 (C-2<sup>maj</sup>), 145.5 (phenyl C-1<sup>maj</sup>), 145.3 (phenyl C-1<sup>min</sup>), 144.6 (aryl C-4<sup>maj</sup>), 144.5 (aryl C-4<sup>min</sup>), 136.3 (indolyl C-7a<sup>min</sup>), 136.2 (indolyl C-7a<sup>maj</sup>), 133.0 (d, *J* 25.1 Hz, aryl C-1<sup>min</sup>), 132.8 (d, *J* 25.1 Hz, aryl C-1<sup>maj</sup>), 129.0 (indolyl C-3a<sup>maj</sup>), 129.0 (indolyl C-3a<sup>min</sup>), 128.8 (aryl C<sub>2</sub>-2,6<sup>maj</sup>), 128.84 (aryl C<sub>2</sub>-3,5<sup>min</sup>), 128.7 (phenyl C-4), 126.9 (phenyl C<sub>2</sub>-3,5<sup>min</sup>), 126.8 (phenyl C<sub>2</sub>-3,5<sup>maj</sup>), 126.73 (phenyl C<sub>2</sub>-2,6<sup>min</sup>), 126.68 (phenyl C<sub>2</sub>-2,6<sup>maj</sup>), 124.8 (indolyl C-2<sup>maj</sup>), 124.5 (indolyl C-2<sup>min</sup>), 123.2 (indolyl C-6<sup>maj</sup>), 123.1 (indolyl C-6<sup>min</sup>), 120.6 (indolyl C-5), 120.0 (indolyl C-4<sup>maj</sup>), 119.9 (indolyl C-4<sup>min</sup>), 114.3 (indolyl C-3<sup>maj</sup>), 113.9 (indolyl C-3<sup>min</sup>), 109.2 (indolyl C-7<sup>maj</sup>), 109.0 (indolyl C-7<sup>min</sup>), 62.9 (hydroxyethyl C-2<sup>maj</sup>), 62.8 (hydroxyethyl C-2<sup>min</sup>), 59.9 (C-1<sup>maj</sup>), 59.7 (C-1<sup>min</sup>), 47.2 (piperidiny C<sub>A</sub>-2,6<sup>maj</sup>), 46.4 (piperidiny C<sub>A</sub>-2,6<sup>min</sup>), 44.1 (piperidiny C<sub>B</sub>-2,6<sup>maj</sup>), 43.6 (piperidiny C<sub>B</sub>-2,6<sup>min</sup>), 42.5 (piperidiny C-4<sup>maj</sup>), 42.3 (piperidiny C-4<sup>min</sup>), 33.8 (piperidiny C<sub>A</sub>-3,5<sup>min</sup>), 33.1 (piperidiny C<sub>A</sub>-3,5<sup>maj</sup>), 33.1 (piperidiny C<sub>B</sub>-3,5<sup>maj</sup>), 32.8 (piperidiny C<sub>B</sub>-3,5<sup>min</sup>), 28.9 (hydroxyethyl C-1<sup>min</sup>), 28.8 (hydroxyethyl C-1<sup>maj</sup>);  $\delta_f$  (470 MHz, CDCl<sub>3</sub>): 66.1 (SO<sub>2</sub>F); HRMS found MH<sup>+</sup> 521.1908. C<sub>29</sub>H<sub>29</sub>FN<sub>2</sub>O<sub>4</sub>S requires *MH*, 521.1905.

Also obtained was the *indole derivative 2-3b* (0.10 mg, 1%, *rotamers* 45:55 by <sup>1</sup>H NMR) as a colourless oil. *R<sub>f</sub>* 0.34 (EtOAc–hexane 50:50).  $\nu_{\max}/\text{cm}^{-1}$ : 3419, 3059, 2924, 2858, 1645, 1458, 1412, 1213, 1098;  $\delta_H$  (500 MHz, CDCl<sub>3</sub>): 7.97 (2H, d, *J* 8.6 Hz, aryl 2,6-H<sup>min</sup>), 7.96 (2H, d, *J* 8.6 Hz, aryl 2,6-H<sup>maj</sup>), 7.92 (2H, br. s, NH), 7.67 (4H, app. t, *J* 8.6 Hz, aryl 3,5-H), 7.61 (2H, app. t, *J* 8.0 Hz, indolyl 4-H), 7.37-7.15 (10H, m, indolyl 6,7-H and phenyl 3,4,5-H), 7.14-7.10 (2H, m, indolyl 5-H), 7.09-7.05 (4H, indolyl 2-H and phenyl 2,6-H<sup>min</sup>), 7.00 (2H, d, *J* 7.3 Hz, phenyl 2,6-H<sup>maj</sup>), 5.31 (1H, s,

1-H<sup>maj</sup>), 5.29 (1H, s, 1-H<sup>min</sup>), 4.70-4.62 (2H, m, piperidiny 2-H<sub>A</sub> or piperidiny 6-H<sub>A</sub>), 4.09-3.85 (6H, m, piperidiny 2-H<sub>A</sub> or piperidiny 6-H<sub>A</sub> and ethoxyindoly 2-H<sub>2</sub>), 3.23-3.15 (4H, m, ethoxyindoly 1-H<sub>2</sub>), 2.70-2.48 (6H, m, piperidiny 2,6-H<sub>B</sub> and piperidiny 4-H), 1.91-1.79 (2H, m, piperidiny 3-H<sub>A</sub> or piperidiny 5-H<sub>A</sub>), 1.50-1.21 (4H, m, piperidiny 3-H<sub>A</sub> or piperidiny 5-H<sub>A</sub> and piperidiny 3-H<sub>B</sub> or piperidiny 5-H<sub>B</sub>), 0.89-0.77 (2H, m, piperidiny 3-H<sub>B</sub> or piperidiny 5-H<sub>B</sub>);  $\delta_c$  (125 MHz, CDCl<sub>3</sub>): 167.7 (C-2<sup>maj</sup>), 167.5 (C-2<sup>min</sup>), 146.01 (phenyl C-1<sup>maj</sup>), 145.97 (phenyl C-1<sup>min</sup>), 144.4 (aryl C-4<sup>min</sup>), 144.3 (aryl C-4<sup>maj</sup>), 136.4 (indoly C-7a<sup>maj</sup>), 136.1 (indoly C-7a<sup>min</sup>), 128.8 (indoly C-3a), 128.7 (aryl C<sub>2-2,6</sub> and phenyl C-4), 127.4 (aryl C<sub>2-3,6</sub>), 127.0 (phenyl C<sub>2-3,5</sub><sup>min</sup>), 126.8 (phenyl C<sub>2-3,5</sub><sup>maj</sup>), 126.71 (phenyl C<sub>2-2,6</sub><sup>min</sup>), 126.67 (phenyl C<sub>2-2,6</sub><sup>maj</sup>), 122.4 (indoly C-6), 122.2 (indoly C-2), 119.6 (indoly C-5), 118.9 (indoly C-4), 112.9 (indoly C-3), 111.4 (indoly C-7), 83.6 (C-1<sup>min</sup>), 82.7 (C-1<sup>maj</sup>), 71.7 (ethoxyindoly C-2<sup>maj</sup>), 70.9 (ethoxyindoly C-2<sup>min</sup>), 45.6 (piperidiny C<sub>A-2,6</sub><sup>maj</sup>), 45.4 (piperidiny C<sub>A-2,6</sub><sup>min</sup>), 43.5 (piperidiny C<sub>B-2,6</sub>), 42.4 (piperidiny C-4), 33.4 (piperidiny C<sub>A-3,5</sub><sup>min</sup>), 33.1 (piperidiny C<sub>A-3,5</sub><sup>maj</sup>), 33.0 (piperidiny C<sub>B-3,5</sub><sup>maj</sup>), 32.8 (piperidiny C<sub>B-3,5</sub><sup>min</sup>), 26.1 (ethoxyindoly C-1<sup>maj</sup>), 26.0 (ethoxyindoly C-1<sup>min</sup>);  $\delta_F$  (470 MHz, CDCl<sub>3</sub>): 66.2 (SO<sub>2</sub>F<sup>min</sup>), 66.1 (SO<sub>2</sub>F<sup>maj</sup>); HRMS found MNa<sup>+</sup> 453.1720. C<sub>29</sub>H<sub>29</sub>FN<sub>2</sub>O<sub>4</sub>S requires *MNa*, 543.1724. Aryl C-1 not observed by <sup>13</sup>C NMR (125 MHz).

#### 4-[1-(Naphthalen-1-yloxy)-2-oxo-2-(4-phenylpiperidin-1-yl)ethyl]benzene-1-sulfonyl fluoride (2-4)

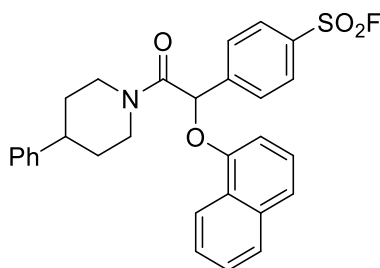

Prepared according to general procedure A – implementation of reaction array, diazo substrate **D2** (100 mM), co-substrate **C4** (500 mM) and Rh<sub>2</sub>(pfb)<sub>4</sub> (1 mM) gave a crude material. This was then purified via preparative HPLC eluting with gradient elution: 5:95 → 55:45 → 75:25 → 95:5 MeCN–H<sub>2</sub>O to give the *naphthalene derivative* **2-4** (1.10 mg, 11%, *rotamers* 44:56 by <sup>1</sup>H NMR) as a colourless oil. *R*<sub>f</sub> 0.65 (EtOAc–hexane 50:50).  $\nu_{max}/cm^{-1}$ : 3060, 2932, 2853, 1646, 1493, 1412, 1264, 1214, 1100;  $\delta_H$  (500

MHz, CDCl<sub>3</sub>): 8.43-8.32 (2H, m, naphthanenyl 8-H), 8.12 (4H, d, *J* 8.5 Hz, aryl 2,6-H), 8.01-7.98 (4H, m, aryl 3,5-H), 7.90-7.95 (2H, m, naphthanenyl 5-H), 7.60-7.52 (6H, m, naphthanenyl 4,6,7-H), 7.41 (1H, t, *J* 8.0 Hz, naphthanenyl 3-H<sup>maj</sup>), 7.37 (1H, t, *J* 8.0 Hz, naphthanenyl 3-H<sup>min</sup>), 7.30-7.25 (2H, m, phenyl 3,5-H<sup>min</sup>), 7.22-7.09 (4H, m, phenyl 4-H and phenyl 3,5-H<sup>maj</sup>), 7.08-7.02 (3H, m, phenyl 2,6-H<sup>min</sup> and naphthanenyl 2-H<sup>maj</sup>), 6.95 (1H, d, *J* 7.7 Hz, naphthanenyl 2-H<sup>min</sup>), 6.73 (2H, d, *J* 7.0 Hz, phenyl 2,6-H<sup>maj</sup>), 6.29 (2H, s, 1-H), 4.73 (2H, app. t, *J* 11.7 Hz, piperidinyl 2-H<sub>A</sub> or piperidinyl 6-H<sub>A</sub>), 4.32 (2H, app. d, *J* 13.2 Hz, piperidinyl 2-H<sub>A</sub> or piperidinyl 6-H<sub>A</sub>), 3.04 (1H, td, *J* 13.2 and 2.3 Hz, piperidinyl 2-H<sub>B</sub><sup>min</sup> or piperidinyl 6-H<sub>B</sub><sup>min</sup>), 2.83 (1H, td, *J* 13.2 and 2.3 Hz, piperidinyl 2-H<sub>B</sub><sup>maj</sup> or piperidinyl 6-H<sub>B</sub><sup>maj</sup>), 2.74-2.51 (4H, m, piperidinyl 2-H<sub>B</sub> or piperidinyl 6-H<sub>B</sub> and piperidinyl 4-H), 1.90 (1H, app. d, *J* 13.2 Hz, piperidinyl 3-H<sub>A</sub><sup>min</sup> or piperidinyl 5-H<sub>A</sub><sup>min</sup>), 1.79 (1H, app. d, *J* 13.2 Hz, piperidinyl 3-H<sub>A</sub><sup>maj</sup> or piperidinyl 5-H<sub>A</sub><sup>maj</sup>), 1.67-1.57 (2H, m, piperidinyl 3-H<sub>A</sub> or piperidinyl 5-H<sub>A</sub>), 1.36-1.23 (2H, m, piperidinyl 3-H<sub>B</sub> or piperidinyl 5-H<sub>B</sub>), 1.13-1.00 (2H, m, piperidinyl 3-H<sub>B</sub> or piperidinyl 5-H<sub>B</sub>); δ<sub>C</sub> (125 MHz, CDCl<sub>3</sub>): 166.7 (C-2<sup>maj</sup>), 166.6 (C-2<sup>min</sup>), 152.5 (naphthanenyl C-1<sup>maj</sup>), 152.2 (naphthanenyl C-1<sup>min</sup>), 144.8 (phenyl C-1<sup>min</sup>), 144.7 (phenyl C-1<sup>maj</sup>), 144.6 (aryl C-4<sup>min</sup>), 144.5 (aryl C-4<sup>maj</sup>), 134.9 (naphthanenyl C-4a), 133.1 (d, *J* 26.2 Hz, aryl C-1), 129.2 (aryl C<sub>2</sub>-2,6<sup>maj</sup>), 129.1 (aryl C<sub>2</sub>-2,6<sup>min</sup>), 128.8 (phenyl C<sub>2</sub>-3,5<sup>min</sup>), 128.6 (phenyl C<sub>2</sub>-3,5<sup>maj</sup>), 128.1 (naphthanenyl C-5), 127.2 (aryl C<sub>2</sub>-3,5<sup>min</sup>), 127.1 (aryl C<sub>2</sub>-3,5<sup>maj</sup>), 126.8 (phenyl C-4), 126.7 (phenyl C<sub>2</sub>-2,6<sup>min</sup>), 126.6 (phenyl C<sub>2</sub>-2,6<sup>maj</sup>), 126.24 (naphthanenyl C-6), 126.16 (naphthanenyl C-7), 125.9 (naphthanenyl C-3), 125.5 (naphthanenyl C-8a<sup>min</sup>), 125.4 (naphthanenyl C-8a<sup>maj</sup>), 122.3 (naphthanenyl C-4), 121.5 (naphthanenyl C-8<sup>min</sup>), 121.4 (naphthanenyl C-8<sup>maj</sup>), 106.5 (naphthanenyl C-2), 80.5 (C-1<sup>maj</sup>), 80.0 (C-1<sup>min</sup>), 46.2 (piperidinyl C<sub>A</sub>-2,6<sup>maj</sup>), 45.8 (piperidinyl C<sub>A</sub>-2,6<sup>min</sup>), 44.2 (piperidinyl C<sub>B</sub>-2,6<sup>maj</sup>), 43.8 (piperidinyl C<sub>B</sub>-2,6<sup>min</sup>), 42.4 (piperidinyl C-4<sup>maj</sup>), 42.3 (piperidinyl C-4<sup>min</sup>), 33.39 (piperidinyl C<sub>A</sub>-3,5<sup>maj</sup>), 33.35 (piperidinyl C<sub>A</sub>-3,5<sup>min</sup>), 32.9 (piperidinyl C<sub>B</sub>-3,5); δ<sub>F</sub> (470 MHz, CDCl<sub>3</sub>): 66.3 (SO<sub>2</sub>F<sup>min</sup>), 66.1 (SO<sub>2</sub>F<sup>maj</sup>); HRMS found MH<sup>+</sup> 504.1638. C<sub>29</sub>H<sub>26</sub>FNO<sub>4</sub>S requires *MH*, 504.1639.

**4-{1-[(4-Chlorophenyl)methoxy]-2-(morpholin-4-yl)-2-oxoethyl}benzene-1-sulfonyl fluoride (1-1)**

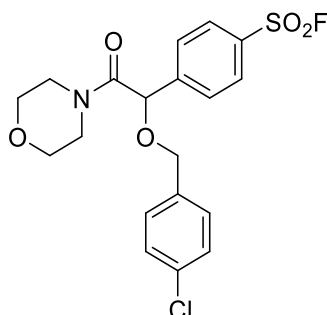

Prepared according to general procedure A – implementation of reaction array, diazo substrate **D1** (100 mM), co-substrate **C1** (500 mM) and  $\text{Rh}_2(\text{cap})_4$  (1 mM) gave a crude material. This was then purified via preparative HPLC eluting with gradient elution: 5:95  $\rightarrow$  35:65  $\rightarrow$  60:40  $\rightarrow$  95:5 MeCN–H<sub>2</sub>O to give the *ether derivative* **1-1** (1.20 mg, 14%) as a colourless oil.  $R_f$  0.21 (EtOAc–hexane 50:50).  $\nu_{\text{max}}/\text{cm}^{-1}$ : 2921, 2861, 1650, 1492, 1439, 1242, 1213, 1115, 1095;  $\delta_{\text{H}}$  (500 MHz, CDCl<sub>3</sub>): 8.03 (2H, d,  $J$  8.6 Hz, aryl 2,6-H), 7.72 (2H, d,  $J$  8.6 Hz, aryl 3,5-H), 7.37 (2H, d,  $J$  8.5 Hz, chlorophenyl 3,5-H), 7.31 (2H, d,  $J$  8.5 Hz, chlorophenyl 2,6-H), 5.33 (1H, s, 1-H), 4.71 (1H, d,  $J$  11.7 Hz, chlorophenylmethoxy 1-H<sub>A</sub>), 4.65 (1H, d,  $J$  11.7 Hz, chlorophenylmethoxy 1-H<sub>B</sub>), 3.70–3.57 (4H, m, morpholinyl 2-H<sub>2</sub> or morpholinyl 6-H<sub>2</sub> and morpholinyl 3-H<sub>2</sub> or morpholinyl 5-H<sub>2</sub>), 3.56–3.49 (1H, m, morpholinyl 3-H<sub>A</sub> or morpholinyl 5-H<sub>A</sub>), 3.47–3.40 (1H, m, morpholinyl 2-H<sub>A</sub> or morpholinyl 6-H<sub>A</sub>), 3.35–3.25 (2H, m, morpholinyl 3-H<sub>B</sub> or morpholinyl 5-H<sub>B</sub> and morpholinyl 2-H<sub>B</sub> or morpholinyl 6-H<sub>B</sub>);  $\delta_{\text{C}}$  (125 MHz, CDCl<sub>3</sub>): 167.5 (C-2), 145.0 (aryl C-4), 134.8 (chlorophenyl C-1), 134.6 (chlorophenyl C-4), 133.0 (d,  $J$  25.0 Hz, aryl C-1), 129.6 (chlorophenyl C<sub>2</sub>-2,6), 129.1 (chlorophenyl C<sub>2</sub>-3,5), 129.0 (aryl C<sub>2</sub>-2,6), 127.2 (aryl C<sub>2</sub>-3,5), 81.7 (C-1), 72.0 (chlorophenylmethoxy C-1), 66.9 (morpholinyl C<sub>A</sub>-2,6), 66.5 (morpholinyl C<sub>B</sub>-2,6), 45.8 (morpholinyl C<sub>A</sub>-3,5), 43.1 (morpholinyl C<sub>B</sub>-3,5);  $\delta_{\text{F}}$  (470 MHz, CDCl<sub>3</sub>): 66.1 (SO<sub>2</sub>F); HRMS found  $\text{MH}^+$  450.0548. C<sub>19</sub>H<sub>19</sub>ClFNO<sub>5</sub>S requires  $\text{MH}$ , 450.0549.

**4-{1-[(2-Bromophenyl)methoxy]-2-(morpholin-4-yl)-2-oxoethyl}benzene-1-sulfonyl fluoride (1-2)**

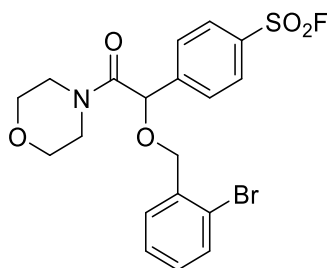

Prepared according to general procedure A – implementation of reaction array, diazo substrate **D1** (100 mM), co-substrate **C2** (500 mM) and  $\text{Rh}_2(\text{cap})_4$  (1 mM) gave a crude material. This was then purified via preparative HPLC eluting with gradient elution: 5:95  $\rightarrow$  55:45  $\rightarrow$  75:25  $\rightarrow$  95:5 MeCN–H<sub>2</sub>O to give the *ether derivative* **1-2** (1.10 mg, 12%) as a colourless oil.  $R_f$  0.30 (EtOAc–hexane 50:50).  $\nu_{\text{max}}/\text{cm}^{-1}$ : 2917, 2858, 1650, 1439, 1411, 1213, 1115, 1097;  $\delta_{\text{H}}$  (500 MHz, CDCl<sub>3</sub>): 8.04 (2H, d,  $J$  8.6 Hz, aryl 2,6-H), 7.76 (2H, d,  $J$  8.6 Hz, aryl 3,5-H), 7.61 (1H, dd,  $J$  8.0 and 1.2 Hz, bromophenyl 3-H), 7.46 (1H, dd,  $J$  7.6 and 1.5 Hz, bromophenyl 6-H), 7.36 (1H, td,  $J$  7.6 and 1.2 Hz, bromophenyl 5-H), 7.24 (1H, td,  $J$  7.8 and 1.5 Hz, bromophenyl 4-H), 5.40 (1H, s, 1-H), 4.82 (1H, d,  $J$  12.1 Hz, bromophenylmethoxy 1-H<sub>A</sub>), 4.76 (1H, d,  $J$  12.1 Hz, bromophenylmethoxy 1-H<sub>B</sub>), 3.70–3.60 (4H, m, morpholinyl 2-H<sub>2</sub> or morpholinyl 6-H<sub>2</sub> and morpholinyl 3-H<sub>2</sub> or morpholinyl 5-H<sub>2</sub>), 3.56 (1H, ddd,  $J$  10.4, 9.3 and 4.4 Hz, morpholinyl 3-H<sub>A</sub> or morpholinyl 5-H<sub>A</sub>), 3.45 (1H, ddd,  $J$  10.8, 6.6 and 2.6 Hz, morpholinyl 2-H<sub>A</sub> or morpholinyl 6-H<sub>A</sub>), 3.37–3.27 (2H, m, morpholinyl 3-H<sub>B</sub> or morpholinyl 5-H<sub>B</sub> and morpholinyl 2-H<sub>B</sub> or morpholinyl 6-H<sub>B</sub>);  $\delta_{\text{C}}$  (125 MHz, CDCl<sub>3</sub>): 167.5 (C-2), 145.1 (aryl C-4), 135.8 (bromophenyl C-1), 130.2 (bromophenyl C-3), 132.9 (d,  $J$  25.0 Hz, aryl C-1), 130.2 (bromophenyl C<sub>2</sub>-4,6), 129.0 (aryl C<sub>2</sub>-2,6), 127.8 (bromophenyl C-5), 127.3 (aryl C<sub>2</sub>-3,5), 123.7 (bromophenyl C-2), 82.1 (C-1), 72.4 (bromophenylmethoxy C-1), 66.9 (morpholinyl C<sub>A</sub>-2,6), 66.6 (morpholinyl C<sub>B</sub>-2,6), 45.9 (morpholinyl C<sub>A</sub>-3,5), 43.1 (morpholinyl C<sub>B</sub>-3,5);  $\delta_{\text{F}}$  (470 MHz, CDCl<sub>3</sub>): 66.1 (SO<sub>2</sub>F); HRMS found  $\text{MNa}^+$  494.0045. C<sub>19</sub>H<sub>19</sub>BrFNO<sub>5</sub>S requires  $\text{MNa}$ , 494.0044.

**4-{1-[(4-Bromo-3,5-dimethoxyphenyl)methoxy]-2-(morpholin-4-yl)-2-oxoethyl}benzene-1-sulfonyl fluoride (**1-8**)**

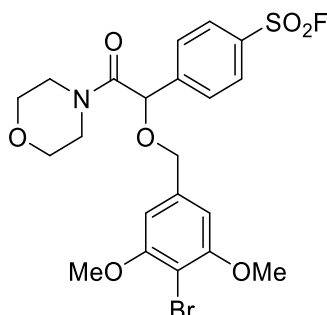

Prepared according to general procedure A – implementation of reaction array, diazo substrate **D1** (100 mM), co-substrate **C8** (500 mM) and  $\text{Rh}_2(\text{cap})_4$  (1 mM) gave a crude material. This was then purified via preparative HPLC eluting with gradient elution: 5:95  $\rightarrow$  35:65  $\rightarrow$  60:40  $\rightarrow$  95:5 MeCN–H<sub>2</sub>O to give the *ether derivative* **1-8** (1.30 mg, 12%) as a colourless oil.  $R_f$  0.10 (EtOAc–hexane 50:50).  $\nu_{\text{max}}/\text{cm}^{-1}$ : 2916, 2854, 1649, 1590, 1459, 1412, 1236, 1213, 1122, 1034;  $\delta_{\text{H}}$  (500 MHz, CDCl<sub>3</sub>): 8.04 (2H, d,  $J$  8.6 Hz, aryl 2,6-H), 7.72 (2H, d,  $J$  8.6 Hz, aryl 3,5-H), 6.58 (2H, s, dimethoxyphenyl 2,6-H), 5.34 (1H, s, 1-H), 4.71 (1H, d,  $J$  12.0 Hz, dimethoxyphenylmethoxy 1-H<sub>A</sub>), 4.65 (1H, d,  $J$  12.0 Hz, dimethoxyphenylmethoxy 1-H<sub>B</sub>), 3.91 (6H, s, OMe), 3.68–3.58 (4H, m, morpholinyl 2-H<sub>2</sub> or morpholinyl 6-H<sub>2</sub> and morpholinyl 3-H<sub>2</sub> or morpholinyl 5-H<sub>2</sub>), 3.57–3.49 (1H, m, morpholinyl 3-H<sub>A</sub> or morpholinyl 5-H<sub>A</sub>), 3.48–3.39 (1H, m, morpholinyl 2-H<sub>A</sub> or morpholinyl 6-H<sub>A</sub>), 3.36–3.28 (2H, m, morpholinyl 3-H<sub>B</sub> or morpholinyl 5-H<sub>B</sub> and morpholinyl 2-H<sub>B</sub> or morpholinyl 6-H<sub>B</sub>);  $\delta_{\text{C}}$  (125 MHz, CDCl<sub>3</sub>): 167.5 (C-2), 157.5 (dimethoxyphenyl C<sub>2</sub>-3,5), 145.0 (aryl C-4), 137.0 (dimethoxyphenyl C-1), 133.1 (d,  $J$  25.1 Hz, aryl C-1), 129.1 (aryl C<sub>2</sub>-2,6), 127.2 (aryl C<sub>2</sub>-3,5), 104.5 (dimethoxyphenyl C<sub>2</sub>-2,6), 101.2 (dimethoxyphenyl C-4), 81.4 (C-1), 72.7 (dimethoxyphenylmethoxy C-1), 66.9 (morpholinyl C<sub>A</sub>-2,6), 66.5 (morpholinyl C<sub>B</sub>-2,6), 56.7 (OMe), 45.9 (morpholinyl C<sub>A</sub>-3,5), 43.1 (morpholinyl C<sub>B</sub>-3,5);  $\delta_{\text{F}}$  (470 MHz, CDCl<sub>3</sub>): 66.1 (SO<sub>2</sub>F); HRMS found  $\text{MNa}^+$  554.0251. C<sub>21</sub>H<sub>23</sub>BrFNO<sub>7</sub>S requires  $\text{MNa}$ , 554.0251.



**4-{1-[(2-Bromophenyl)methoxy]-2-oxo-2-(4-phenylpiperidin-1-yl)ethyl}benzene-1-sulfonyl fluoride (2-2)**

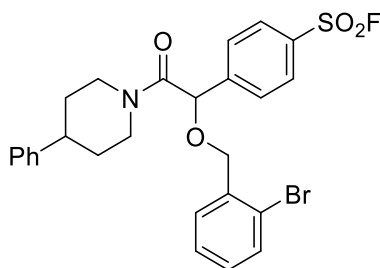

Prepared according to general procedure A – implementation of reaction array, diazo substrate **D2** (100 mM), co-substrate **C2** (500 mM) and Rh<sub>2</sub>(cap)<sub>4</sub> (1 mM) gave a crude material. This was then purified *via* preparative HPLC eluting with gradient elution: 5:95 → 55:45 → 75:25 → 95:5 MeCN–H<sub>2</sub>O to give the *ether derivative* **2-2** (1.50 mg, 14%, *rotamers* 48:52 by <sup>1</sup>H NMR) as a colourless oil. *R*<sub>f</sub> 0.59 (EtOAc–hexane 50:50). *v*<sub>max</sub>/cm<sup>-1</sup>: 3030, 2920, 2859, 1643, 1452, 1410, 1270, 1212, 1123, 1095; δ<sub>H</sub> (500 MHz, CDCl<sub>3</sub>): 8.05 (2H, d, *J* 8.4 Hz, aryl 2,6-H<sup>min</sup>), 8.04 (2H, d, *J* 8.4 Hz, aryl 2,6-H<sup>maj</sup>), 7.83–7.77 (4H, m, aryl 3,5-H), 7.60 (2H, dd, *J* 8.0 and 2.0 Hz, bromophenyl 3-H), 7.54–7.50 (2H, m, bromophenyl 6-H), 7.38–7.33 (2H, m, bromophenyl 5-H), 7.32–7.26 (4H, m, phenyl 3,5-H), 7.25–7.17 (4H, m, bromophenyl 4-H and phenyl 4-H), 7.11 (2H, d, *J* 7.3 Hz, phenyl 2,6-H<sup>maj</sup>), 7.04 (2H, d, *J* 7.3 Hz, phenyl 2,6-H<sup>min</sup>), 5.45 (2H, s, 1-H), 4.91 (1H, d, *J* 12.3 Hz, bromophenylmethoxy 1-H<sup>Amin</sup>), 4.84–4.71 (5H, m, bromophenylmethoxy 1-H<sup>Amin</sup>, bromophenylmethoxy 1-H<sub>B</sub> and piperidinyl 2-H<sub>A</sub> or piperidinyl 6-H<sub>A</sub>), 4.21–4.10 (2H, m, piperidinyl 2-H<sub>A</sub> or piperidinyl 6-H<sub>A</sub>), 3.03 (1H, td, *J* 13.6 and 2.4 Hz, piperidinyl 2-H<sub>B</sub><sup>min</sup> or piperidinyl 6-H<sub>B</sub><sup>min</sup>), 2.80–2.59 (5H, m, piperidinyl 2-H<sub>B</sub><sup>maj</sup> or piperidinyl 6-H<sub>B</sub><sup>maj</sup>, piperidinyl 2-H<sub>B</sub> or piperidinyl 6-H<sub>B</sub> and piperidinyl 4-H), 1.98–1.85 (2H, m, piperidinyl 3-H<sub>A</sub> or piperidinyl 5-H<sub>A</sub>), 1.74 (1H, app. d, *J* 13.1 Hz, piperidinyl 3-H<sub>A</sub><sup>maj</sup> or piperidinyl 5-H<sub>A</sub><sup>maj</sup>), 1.67–1.56 (3H, m, piperidinyl 3-H<sub>B</sub> or piperidinyl 5-H<sub>B</sub> and piperidinyl 3-H<sub>A</sub><sup>min</sup> or piperidinyl 5-H<sub>A</sub><sup>min</sup>), 1.45 (1H, qd, *J* 12.7 and 4.1 Hz, piperidinyl 3-H<sub>B</sub><sup>min</sup> or piperidinyl 5-H<sub>B</sub><sup>min</sup>), 0.98 (1H, qd, *J* 12.7 and 4.1 Hz, piperidinyl 3-H<sub>B</sub><sup>maj</sup> or piperidinyl 5-H<sub>B</sub><sup>maj</sup>); δ<sub>C</sub> (125 MHz, CDCl<sub>3</sub>): 167.3 (C-2<sup>maj</sup>), 167.2 (C-2<sup>min</sup>), 145.5 (aryl C-4<sup>min</sup>), 145.4 (aryl C-4<sup>min</sup>), 144.9 (phenyl C-1<sup>maj</sup>), 144.8 (phenyl C-1<sup>min</sup>), 136.1 (bromophenyl C-1), 132.8 (d, *J* 24.6 Hz, aryl C-1<sup>min</sup>), 132.7 (d, *J* 24.6 Hz, aryl C-1<sup>maj</sup>), 130.2 (bromophenyl C-3), 130.02 (bromophenyl C-6<sup>maj</sup>), 129.99 (bromophenyl C-6<sup>min</sup>), 129.0 (aryl C<sub>2</sub>-2,6<sup>maj</sup>), 128.9 (aryl C<sub>2</sub>-2,6<sup>min</sup>), 128.8 (phenyl C<sub>2</sub>-3,5), 127.8 (bromophenyl C-5), 127.5 (aryl C<sub>2</sub>-3,5<sup>min</sup>), 127.3 (aryl C<sub>2</sub>-3,5<sup>maj</sup>), 126.7

(phenyl C<sub>2</sub>-2,6), 126.7 (phenyl C-4), 123.7 (bromophenyl C-2<sup>maj</sup>), 123.5 (bromophenyl C-2<sup>min</sup>), 82.4 (C-1<sup>min</sup>), 82.0 (C-1<sup>maj</sup>), 72.4 (bromophenylmethoxy C-1<sup>maj</sup>), 72.1 (bromophenylmethoxy C-1<sup>min</sup>), 45.9 (piperidiny C<sub>A</sub>-2,6<sup>maj</sup>), 45.8 (piperidiny C<sub>A</sub>-2,6<sup>min</sup>), 43.73 (piperidiny C<sub>B</sub>-2,6<sup>maj</sup>), 43.67 (piperidiny C<sub>B</sub>-2,6<sup>min</sup>), 42.5 (piperidiny C-4), 33.5 (piperidiny C<sub>A</sub>-3,5<sup>min</sup>), 33.3 (piperidiny C<sub>A</sub>-3,5<sup>maj</sup>), 33.3 (piperidiny C<sub>B</sub>-3,5<sup>maj</sup>), 32.9 (piperidiny C<sub>B</sub>-3,5<sup>min</sup>);  $\delta_F$  (470 MHz, CDCl<sub>3</sub>): 66.2 (SO<sub>2</sub>F<sup>min</sup>), 66.1 (SO<sub>2</sub>F<sup>maj</sup>); HRMS found MH<sup>+</sup> 546.0743. C<sub>26</sub>H<sub>25</sub>BrFNO<sub>4</sub>S requires *MH*, 546.0744.

**4-{1-[(2-Chloro-5-fluorophenyl)methoxy]-2-oxo-2-(4-phenylpiperidin-1-yl)ethyl}benzene-1-sulfonyl fluoride (2-5)**

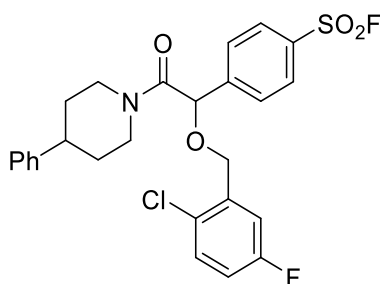

Prepared according to general procedure A – implementation of reaction array, diazo substrate **D2** (100 mM), co-substrate **C5** (500 mM) and Rh<sub>2</sub>(cap)<sub>4</sub> (1 mM) gave a crude material. This was then purified via preparative HPLC eluting with gradient elution: 5:95 → 55:45 → 75:25 → 95:5 MeCN–H<sub>2</sub>O to give the *ether derivative* **2-5** (1.40 mg, 14%, *rotamers* 51:49 by <sup>1</sup>H NMR) as a colourless oil. *R*<sub>f</sub> 0.66 (EtOAc–hexane 50:50).  $\nu_{\max}/\text{cm}^{-1}$ : 3062, 2921, 2858, 1644, 1452, 1411, 1269, 1212, 1096;  $\delta_H$  (500 MHz, CDCl<sub>3</sub>): 8.06 (4H, d, *J* 7.1 Hz, aryl 2,6-H), 7.79 (4H, app. t, *J* 9.3 Hz, aryl 3,5-H), 7.39–7.34 (2H, m, chlorophenyl 3-H), 7.32–7.25 (6H, m, chlorophenyl 6-H and phenyl 3,5-H), 7.24–7.19 (2H, m phenyl 4-H), 7.10 (2H, d, *J* 7.4 Hz, phenyl 2,6-H<sup>maj</sup>), 7.06 (2H, d, *J* 7.4 Hz, phenyl 2,6-H<sup>min</sup>), 7.03–6.96 (2H, m, chlorophenyl 4-H), 5.46 (2H, s, 1-H), 4.89 (1H, d, *J* 12.9 Hz, chlorophenylmethoxy 1-H<sup>Amin</sup>), 4.83–4.69 (5H, m, chlorophenylmethoxy 1-H<sup>A</sup><sup>maj</sup>, chlorophenylmethoxy 1-H<sub>B</sub> and piperidiny 2-H<sub>A</sub> or piperidiny 6-H<sub>A</sub>), 4.14 (2H, app. t, *J* 12.7 Hz, piperidiny 2-H<sub>A</sub> or piperidiny 6-H<sub>A</sub>), 3.04 (1H, td, *J* 13.7 and 2.2 Hz, piperidiny 2-H<sub>B</sub><sup>min</sup> or piperidiny 6-H<sub>B</sub><sup>min</sup>), 2.80 (1H, td, *J* 13.7 and 2.2 Hz, piperidiny 2-H<sub>B</sub><sup>maj</sup> or piperidiny 6-H<sub>B</sub><sup>maj</sup>), 2.75–2.63 (4H, m, piperidiny 2-H<sub>B</sub> or piperidiny 6-H<sub>B</sub> and piperidiny 4-H), 1.93 (2H, app. t, *J* 15.4 Hz, piperidiny 3-

H<sub>A</sub> or piperidiny 5-H<sub>A</sub>), 1.77 (1H, app. d, *J* 13.0 Hz, piperidiny 3-H<sub>A</sub><sup>maj</sup> or piperidiny 5-H<sub>A</sub><sup>maj</sup>), 1.69-1.55 (3H, m, piperidiny 3-H<sub>A</sub><sup>min</sup> or piperidiny 5-H<sub>A</sub><sup>min</sup> and piperidiny 3-H<sub>B</sub> or piperidiny 5-H<sub>B</sub>), 1.39 (1H, qd, *J* 12.7 and 4.3 Hz, piperidiny 3-H<sub>B</sub><sup>maj</sup> or piperidiny 5-H<sub>B</sub><sup>maj</sup>), 1.02 (1H, qd, *J* 12.7 and 4.3 Hz, piperidiny 3-H<sub>B</sub><sup>min</sup> or piperidiny 5-H<sub>B</sub><sup>min</sup>); δ<sub>C</sub> (125 MHz, CDCl<sub>3</sub>): 167.0 (C-2<sup>maj</sup>), 166.9 (C-2<sup>min</sup>), 161.6 (d, *J* 247.1 Hz, chlorophenyl C-5), 145.1 (aryl C-4<sup>maj</sup>), 145.0 (aryl C-4<sup>min</sup>), 144.8 (phenyl C-1<sup>maj</sup>), 144.7 (phenyl C-1<sup>min</sup>), 136.7 (d, *J* 7.6 Hz, chlorophenyl C-1), 133.0 (d, *J* 24.9 Hz, aryl C-1), 131.0 (d, *J* 8.2 Hz, chlorophenyl C-3), 129.1 (aryl C<sub>2-2,6</sub><sup>min</sup>), 129.0 (aryl C<sub>2-2,6</sub><sup>maj</sup>), 128.8 (phenyl C<sub>2-3,5</sub>), 127.9 (d, *J* 2.9 Hz, chlorophenyl C-2<sup>min</sup>), 127.7 (d, *J* 2.9 Hz, chlorophenyl C-2<sup>maj</sup>), 127.5 (aryl C<sub>2-3,5</sub><sup>maj</sup>), 127.4 (aryl C<sub>2-3,5</sub><sup>min</sup>), 126.8 (phenyl C<sub>2-2,6</sub>), 126.72 (phenyl C-4<sup>min</sup>), 126.68 (phenyl C-4<sup>maj</sup>), 116.5 (d, *J* 22.9 Hz, chlorophenyl C-4), 116.4 (d, *J* 21.5 Hz, chlorophenyl C-6<sup>min</sup>), 116.2 (d, *J* 21.5 Hz, chlorophenyl C-6<sup>maj</sup>), 82.5 (C-1<sup>min</sup>), 82.1 (C-1<sup>maj</sup>), 69.5 (chlorophenylmethoxy C-1<sup>maj</sup>), 69.2 (chlorophenylmethoxy C-1<sup>min</sup>), 45.9 (piperidiny C<sub>A-2,6</sub><sup>min</sup>), 45.8 (piperidiny C<sub>A-2,6</sub><sup>maj</sup>), 43.8 (piperidiny C<sub>B-2,6</sub><sup>maj</sup>), 43.7 (piperidiny C<sub>B-2,6</sub><sup>min</sup>), 42.5 (piperidiny C-4), 33.5 (piperidiny C<sub>A-3,5</sub><sup>maj</sup>), 33.3 (piperidiny C<sub>A-3,5</sub><sup>min</sup>), 33.2 (piperidiny C<sub>B-3,5</sub><sup>min</sup>), 32.9 (piperidiny C<sub>B-3,5</sub><sup>maj</sup>); δ<sub>F</sub> (470 MHz, CDCl<sub>3</sub>): 66.2 (SO<sub>2</sub>F<sup>maj</sup>), 66.1 (SO<sub>2</sub>F<sup>min</sup>), -114.2 (chlorophenyl CF<sup>min</sup>), -114.3 (chlorophenyl CF<sup>maj</sup>); HRMS found MH<sup>+</sup> 520.1160. C<sub>26</sub>H<sub>24</sub>ClF<sub>2</sub>NO<sub>4</sub>S requires *MH*, 520.1155.

#### 4-[1-(4-Chloro-2,5-dimethylbenzenesulfonamido)-2-oxo-2-(4-phenylpiperidin-1-yl)ethyl]benzene-1-sulfonyl fluoride (2-6)

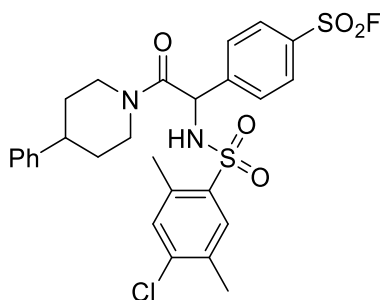

Prepared according to general procedure A – implementation of reaction array, diazo substrate **D2** (100 mM), co-substrate **C6** (500 mM) and Rh<sub>2</sub>(cap)<sub>4</sub> (1 mM) gave a crude material. This was then purified via preparative HPLC eluting with gradient elution: 5:95 → 55:45 → 75:25 → 95:5 MeCN–H<sub>2</sub>O to give the *sulfonamide derivative* **2-6** (1.20

mg, 10%, *rotamers* 43:57 by  $^1\text{H}$  NMR) as a colourless oil.  $R_f$  0.60 (EtOAc–hexane 50:50).  $\nu_{\text{max}}/\text{cm}^{-1}$ : 3234, 3031, 2924, 2860, 1644, 1453, 1413, 1270, 1214, 1161, 1089;  $\delta_{\text{H}}$  (500 MHz,  $\text{CDCl}_3$ ): 7.90 (2H, d,  $J$  8.5 Hz, aryl 2,6- $\text{H}^{\text{maj}}$ ), 7.89 (2H, d,  $J$  8.5 Hz, aryl 2,6- $\text{H}^{\text{min}}$ ), 7.64 (1H, s, sulfonamidophenyl 6- $\text{H}^{\text{maj}}$ ), 7.56 (1H, s, sulfonamidophenyl 6- $\text{H}^{\text{min}}$ ), 7.52–7.48 (4H, m, aryl 3,5-H), 7.34 (2H, app. t,  $J$  7.6 Hz, phenyl 3,5- $\text{H}^{\text{maj}}$ ), 7.26–7.21 (4H, m, phenyl 3,5- $\text{H}^{\text{min}}$  and phenyl 4-H), 7.17 (2H, s, sulfonamidophenyl 3-H), 7.11 (2H, d,  $J$  7.6 Hz, phenyl 2,6- $\text{H}^{\text{maj}}$ ), 6.92 (2H, d,  $J$  7.6 Hz, phenyl 2,6- $\text{H}^{\text{min}}$ ), 6.54 (2H, app. t,  $J$  7.2 Hz, NH), 5.34 (1H, d,  $J$  7.2 Hz, 1- $\text{H}^{\text{min}}$ ), 5.31 (1H, d,  $J$  7.2 Hz, 1- $\text{H}^{\text{maj}}$ ), 4.67–4.61 (2H, m, piperidiny 2- $\text{H}_A$  or piperidiny 6- $\text{H}_A$ ), 3.72–3.64 (2H, m, piperidiny 2- $\text{H}_A$  or piperidiny 6- $\text{H}_A$ ), 3.05 (1H, td,  $J$  13.2 and 2.6 Hz, piperidiny 2- $\text{H}_B^{\text{min}}$  or piperidiny 6- $\text{H}_B^{\text{min}}$ ), 2.78 (1H, td,  $J$  13.2 and 2.6 Hz, piperidiny 2- $\text{H}_B^{\text{maj}}$  or piperidiny 6- $\text{H}_B^{\text{maj}}$ ), 2.69–2.59 (4H, m, piperidiny 2- $\text{H}_B$  or piperidiny 6- $\text{H}_B$  and piperidiny 4-H), 2.58 (3H, s, sulfonamidophenyl 2-methyl $^{\text{maj}}$ ), 2.52 (3H, s, sulfonamidophenyl 2-methyl $^{\text{min}}$ ), 2.30 (3H, s, sulfonamidophenyl 5-methyl $^{\text{min}}$ ), 2.26 (3H, s, sulfonamidophenyl 5-methyl $^{\text{maj}}$ ), 1.92–1.81 (3H, m, piperidiny 3- $\text{H}_A$  or piperidiny 5- $\text{H}_A$  and piperidiny 3- $\text{H}_A^{\text{maj}}$  or piperidiny 5- $\text{H}_A^{\text{maj}}$ ), 1.61–1.56 (1H, m, piperidiny 3- $\text{H}_A^{\text{min}}$  or piperidiny 5- $\text{H}_A^{\text{min}}$ ), 1.48–1.20 (3H, m, piperidiny 3- $\text{H}_B$  or piperidiny 5- $\text{H}_B$  and piperidiny 3- $\text{H}_B^{\text{maj}}$  or piperidiny 5- $\text{H}_B^{\text{maj}}$ ), 0.56 (1H, qd,  $J$  12.7 and 4.2 Hz, piperidiny 3- $\text{H}_B^{\text{min}}$  or piperidiny 5- $\text{H}_B^{\text{min}}$ );  $\delta_{\text{C}}$  (125 MHz,  $\text{CDCl}_3$ ): 165.6 (C-2), 144.4 (aryl C-4 $^{\text{min}}$ ), 144.1 (aryl C-4 $^{\text{maj}}$ ), 144.0 (phenyl C-1 $^{\text{maj}}$ ), 143.9 (phenyl C-1 $^{\text{min}}$ ), 139.3 (sulfonamidophenyl C-1 $^{\text{maj}}$ ), 139.2 (sulfonamidophenyl C-1 $^{\text{min}}$ ), 136.5 (sulfonamidophenyl C-2 $^{\text{maj}}$ ), 136.4 (sulfonamidophenyl C-2 $^{\text{min}}$ ), 136.2 (sulfonamidophenyl C-4 $^{\text{maj}}$ ), 136.1 (sulfonamidophenyl C-4 $^{\text{min}}$ ), 134.0 (sulfonamidophenyl C-5 $^{\text{maj}}$ ), 133.9 (sulfonamidophenyl C-5 $^{\text{min}}$ ), 133.3 (d,  $J$  25.4 Hz, aryl C-1), 133.0 (sulfonamidophenyl C-3 $^{\text{maj}}$ ), 132.8 (sulfonamidophenyl C-3 $^{\text{min}}$ ), 131.5 (sulfonamidophenyl C-6 $^{\text{maj}}$ ), 131.3 (sulfonamidophenyl C-6 $^{\text{min}}$ ), 129.14 (aryl C<sub>2</sub>-2,6), 129.06 (aryl C<sub>2</sub>-3,5), 129.0 (phenyl C<sub>2</sub>-3,5 $^{\text{maj}}$ ), 128.8 (phenyl C<sub>2</sub>-3,5 $^{\text{min}}$ ), 127.02 (phenyl C-4 $^{\text{maj}}$ ), 126.99 (phenyl C-4 $^{\text{min}}$ ), 126.7 (phenyl C<sub>2</sub>-2,6 $^{\text{maj}}$ ), 126.5 (phenyl C<sub>2</sub>-2,6 $^{\text{min}}$ ), 56.7 (C-1 $^{\text{min}}$ ), 56.4 (C-1 $^{\text{maj}}$ ), 46.4 (piperidiny C<sub>A</sub>-2,6 $^{\text{maj}}$ ), 46.0 (piperidiny C<sub>A</sub>-2,6 $^{\text{min}}$ ), 43.9 (piperidiny C<sub>B</sub>-2,6), 42.4 (piperidiny C-4 $^{\text{maj}}$ ), 42.0 (piperidiny C-4 $^{\text{min}}$ ), 33.8 (piperidiny C<sub>A</sub>-3,5), 32.6 (piperidiny C<sub>B</sub>-3,5 $^{\text{maj}}$ ), 32.4 (piperidiny C<sub>B</sub>-3,5 $^{\text{min}}$ ), 19.7 (sulfonamidophenyl 2-methyl $^{\text{maj}}$ ), 19.6 (sulfonamidophenyl 2-methyl $^{\text{min}}$ ), 19.5 (sulfonamidophenyl 5-methyl);  $\delta_{\text{F}}$  (470 MHz,  $\text{CDCl}_3$ ): 66.2 ( $\text{SO}_2\text{F}^{\text{min}}$ ), 66.0 ( $\text{SO}_2\text{F}^{\text{maj}}$ ); HRMS found  $\text{MH}^+$  579.1183.  $\text{C}_{27}\text{H}_{28}\text{ClFN}_2\text{O}_5\text{S}_2$  requires  $\text{MH}$ , 579.1185.

**4-{1-[(4-Bromo-3,5-dimethoxyphenyl)methoxy]-2-oxo-2-(4-phenylpiperidin-1-yl)ethyl}benzene-1-sulfonyl fluoride (2-8)**

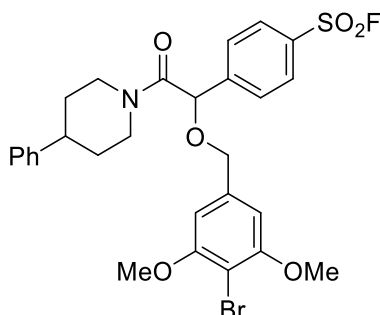

Prepared according to general procedure A – implementation of reaction array, diazo substrate **D2** (100 mM), co-substrate **C8** (500 mM) and  $\text{Rh}_2(\text{cap})_4$  (1 mM) gave a crude material. This was then purified via preparative HPLC eluting with gradient elution: 5:95  $\rightarrow$  55:45  $\rightarrow$  75:25  $\rightarrow$  95:5 MeCN–H<sub>2</sub>O to give the *ether derivative* **2-8** (1.60 mg, 13%, *rotamers* 48:52 by <sup>1</sup>H NMR) as a colourless oil. *R*<sub>f</sub> 0.31 (EtOAc–hexane 50:50).  $\nu_{\text{max}}/\text{cm}^{-1}$ : 2938, 2861, 1645, 1590, 1494, 1455, 1413, 1213, 1124, 1095;  $\delta_{\text{H}}$  (500 MHz, CDCl<sub>3</sub>): 8.05 (2H, d, *J* 8.1 Hz, aryl 2,6-*H*<sup>min</sup>), 8.04 (2H, d, *J* 8.1 Hz, aryl 2,6-*H*<sup>maj</sup>), 7.77 (2H, d, *J* 8.1 Hz, aryl 3,5-*H*<sup>maj</sup>), 7.75 (2H, d, *J* 8.1 Hz, aryl 3,5-*H*<sup>min</sup>), 7.32–7.26 (4H, m, phenyl 3,5-H), 7.24–7.18 (2H, m, phenyl 4-H), 7.08 (2H, d, *J* 7.3 Hz, phenyl 2,6-*H*<sup>min</sup>), 7.04 (2H, d, *J* 7.3 Hz, phenyl 2,6-*H*<sup>maj</sup>), 6.62 (2H, s, dimethoxyphenyl 2,6-*H*<sup>maj</sup>), 6.59 (2H, s, dimethoxyphenyl 2,6-*H*<sup>min</sup>), 5.39 (2H, s, 1-H), 4.81–4.61 (6H, m, dimethoxyphenylmethoxy 1-H<sub>2</sub> and piperidinyl 2-*H*<sub>A</sub> or piperidinyl 6-*H*<sub>A</sub>), 4.15–4.07 (2H, m, piperidinyl 2-*H*<sub>A</sub> or piperidinyl 6-*H*<sub>A</sub>), 3.89 (6H, s, OMe<sup>min</sup>), 3.88 (6H, s, OMe<sup>maj</sup>), 2.98 (1H, td, *J* 13.1 and 2.1 Hz, piperidinyl 2-*H*<sub>B</sub><sup>min</sup> or piperidinyl 6-*H*<sub>B</sub><sup>min</sup>), 2.77–2.61 (5H, m, piperidinyl 2-*H*<sub>B</sub><sup>maj</sup> or piperidinyl 6-*H*<sub>B</sub><sup>maj</sup>, piperidinyl 2-*H*<sub>B</sub> or piperidinyl 6-*H*<sub>B</sub> and piperidinyl 4-H), 1.92 (2H, app. t, *J* 14.8 Hz, piperidinyl 3-*H*<sub>A</sub> or piperidinyl 5-*H*<sub>A</sub>), 1.75 (1H, app. d, *J* 13.4 Hz, piperidinyl 3-*H*<sub>A</sub><sup>maj</sup> or piperidinyl 5-*H*<sub>A</sub><sup>maj</sup>), 1.64 (1H, app. d, *J* 13.4 Hz, piperidinyl 3-*H*<sub>A</sub><sup>min</sup> or piperidinyl 5-*H*<sub>A</sub><sup>min</sup>), 1.59–1.48 (2H, m, piperidinyl 3-*H*<sub>B</sub> or piperidinyl 5-*H*<sub>B</sub>), 1.37 (1H, qd, *J* 12.8 and 4.2 Hz, piperidinyl 3-*H*<sub>B</sub><sup>maj</sup> or piperidinyl 5-*H*<sub>B</sub><sup>maj</sup>), 1.00 (1H, qd, *J* 12.8 and 4.2 Hz, piperidinyl 3-*H*<sub>B</sub><sup>min</sup> or piperidinyl 5-*H*<sub>B</sub><sup>min</sup>);  $\delta_{\text{C}}$  (125 MHz, CDCl<sub>3</sub>): 167.3 (C-2<sup>min</sup>), 167.1 (C-2<sup>maj</sup>), 157.5 (dimethoxyphenyl C<sub>2</sub>-3,5<sup>maj</sup>), 157.4 (dimethoxyphenyl C<sub>2</sub>-3,5<sup>min</sup>), 145.4 (aryl C-4), 144.7 (phenyl C-1<sup>maj</sup>), 144.6 (phenyl C-1<sup>min</sup>), 137.3 (dimethoxyphenyl C-1<sup>maj</sup>), 137.2 (dimethoxyphenyl C-1<sup>min</sup>), 132.8 (d, *J* 25.9 Hz, aryl C-1), 129.02 (aryl C<sub>2</sub>-2,6<sup>maj</sup>), 128.95 (aryl C<sub>2</sub>-2,6<sup>min</sup>), 128.8 (phenyl C<sub>2</sub>-3,5), 127.6 (aryl C<sub>2</sub>-3,5<sup>maj</sup>), 127.2 (aryl C<sub>2</sub>-3,5<sup>min</sup>), 126.9 (phenyl C-4), 126.6

(phenyl C<sub>2</sub>-2,6), 104.6 (dimethoxyphenyl C<sub>2</sub>-2,6), 101.0 (dimethoxyphenyl C-4), 82.0 (C-1<sup>maj</sup>), 81.0 (C-1<sup>min</sup>), 73.0 (dimethoxyphenylmethoxy C-1<sup>maj</sup>), 72.5 (dimethoxyphenylmethoxy C-1<sup>min</sup>), 56.7 (OMe), 45.8 (piperidiny C<sub>A</sub>-2,6), 43.7 (piperidiny C<sub>B</sub>-2,6<sup>min</sup>), 43.6 (piperidiny C<sub>B</sub>-2,6<sup>min</sup>), 42.5 (piperidiny C-4<sup>min</sup>), 42.4 (piperidiny C-4<sup>maj</sup>), 33.7 (piperidiny C<sub>A</sub>-3,5<sup>maj</sup>), 33.5 (piperidiny C<sub>A</sub>-3,5<sup>min</sup>), 33.0 (piperidiny C<sub>B</sub>-3,5<sup>maj</sup>), 32.9 (piperidiny C<sub>B</sub>-3,5<sup>min</sup>);  $\delta_F$  (470 MHz, CDCl<sub>3</sub>): 66.2 (SO<sub>2</sub>F<sup>min</sup>), 66.1 (SO<sub>2</sub>F<sup>maj</sup>); HRMS found MH<sup>+</sup> 606.0953. C<sub>28</sub>H<sub>29</sub>BrFNO<sub>6</sub>S requires *MH*, 606.0956.

**4-[1-[[[(1*R*,5*R*)-2-Methyl-5-(prop-1-en-2-yl)cyclohex-2-en-1-yl]oxy]-2-oxo-2-(4-phenylpiperidin-1-yl)ethyl]benzene-1-sulfonyl fluoride (2-14)**

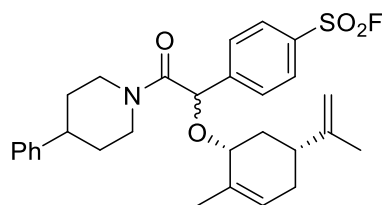

Prepared according to general procedure A – implementation of reaction array, diazo substrate **D2** (100 mM), co-substrate **C14** (500 mM) and Rh<sub>2</sub>(cap)<sub>4</sub> (1 mM) gave a crude material. This was then purified via preparative HPLC eluting with gradient elution: 5:95 → 55:45 → 75:25 → 95:5 MeCN–H<sub>2</sub>O to give the *ether derivative* **2-14** (1.00 mg, 10%, *dr* 51:49 by <sup>1</sup>H NMR) as a colourless oil. *R*<sub>f</sub> 0.78 (EtOAc–hexane 50:50).  $\nu_{\max}/\text{cm}^{-1}$ : 3029, 2921, 2859, 1639, 1493, 1452, 1410, 1269, 1212, 1124, 1095;  $\delta_H$  (500 MHz, CDCl<sub>3</sub>): 8.08-7.98 (4H, m, aryl 2,6-H), 7.86-7.74 (4H, m, aryl 3,5-H), 7.32-7.17 (6H, m, phenyl 3,5-H and phenyl 4-H), 7.14 (2H, d, *J* 7.2 Hz, phenyl 2,6-H<sup>maj</sup>), 7.02-6.96 (2H, m, phenyl 2,6-H<sup>min</sup>), 5.78-5.50 (2H, m, cyclohexenyl 3-H), 5.46 (1H, s, 1-H<sup>min</sup>), 5.42 (1H, s, 1-H<sup>maj</sup>), 4.82-4.65 (6H, m, propenyl 1-H<sub>2</sub> and piperidiny 2-H<sub>A</sub> or piperidiny 6-H<sub>A</sub>), 4.42-4.14 (4H, m, piperidiny 2-H<sub>A</sub> or piperidiny 6-H<sub>A</sub> and cyclohexenyl 1-H), 3.13-2.94 (1H, m, piperidiny 2-H<sub>B</sub><sup>maj</sup> or piperidiny 6-H<sub>B</sub><sup>maj</sup>), 2.74-2.54 (5H, m, piperidiny 2-H<sub>B</sub><sup>min</sup> or piperidiny 6-H<sub>B</sub><sup>min</sup>, piperidiny 2-H<sub>B</sub> or piperidiny 6-H<sub>B</sub> and piperidiny 4-H), 2.43-2.18 (4H, m, cyclohexenyl 5-H and piperidiny 3-H<sub>A</sub> or piperidiny 5-H<sub>A</sub>), 2.15-1.50 (25H, m, piperidiny 3-H<sub>A</sub> or piperidiny 5-H<sub>A</sub> cyclohexenyl 4,6-H<sub>2</sub>, cyclohexenyl 2-methyl, propenyl 3-H<sub>3</sub>, piperidiny 3-H<sub>B</sub> or piperidiny 5-H<sub>B</sub> and piperidiny 3-H<sub>B</sub><sup>maj</sup> or piperidiny 5-H<sub>B</sub><sup>maj</sup>), 0.73 (1H, qd, *J* 12.8 and 4.2 Hz, piperidiny

3-H<sub>B</sub><sup>min</sup> or piperidiny 5-H<sub>B</sub><sup>min</sup>);  $\delta_C$  (125 MHz, CDCl<sub>3</sub>): 169.2 (C-2<sup>maj</sup>), 168.8 (C-2<sup>min</sup>), 148.6 (propenyl C-2<sup>maj</sup>), 148.5 (propenyl C-2<sup>min</sup>), 146.6 (aryl C-4), 145.1 (phenyl C-1<sup>maj</sup>), 144.8 (phenyl C-1<sup>min</sup>), 134.4 (cyclohexenyl C-2<sup>maj</sup>), 134.3 (cyclohexenyl C-2<sup>min</sup>), 132.4 (d, *J* 24.9 Hz, aryl C-1), 128.9 (aryl C<sub>2</sub>-2,6<sup>min</sup>), 128.84 (aryl C<sub>2</sub>-2,6<sup>maj</sup>), 128.76 (phenyl-3,5), 126.83 (aryl C<sub>2</sub>-3,5<sup>min</sup>), 126.76 (aryl C<sub>2</sub>-3,5<sup>maj</sup>), 126.7 (phenyl C<sub>2</sub>-2,6<sup>maj</sup>), 126.63 (phenyl C<sub>2</sub>-2,6<sup>min</sup>), 126.58 (phenyl C-4<sup>maj</sup>), 126.5 (phenyl C-4<sup>min</sup>), 126.0 (cyclohexenyl C-3<sup>maj</sup>), 125.9 (cyclohexenyl C-3<sup>min</sup>), 109.7 (propenyl C-1<sup>maj</sup>), 109.6 (propenyl C-1<sup>min</sup>), 83.5 (C-1<sup>maj</sup>), 83.2 (C-1<sup>min</sup>), 81.3 (cyclohexenyl C-1<sup>min</sup>), 80.8 (cyclohexenyl C-1<sup>maj</sup>), 46.1 (piperidiny C<sub>A</sub>-2,6<sup>min</sup>), 45.6 (piperidiny C<sub>A</sub>-2,6<sup>maj</sup>), 43.8 (piperidiny C<sub>B</sub>-2,6<sup>maj</sup>), 43.5 (piperidiny C<sub>B</sub>-2,6<sup>min</sup>), 42.5 (piperidiny C-4), 40.7 (cyclohexenyl C-5<sup>min</sup>), 40.6 (cyclohexenyl C-5<sup>maj</sup>), 35.7 (piperidiny C<sub>A</sub>-3,5<sup>maj</sup>), 34.8 (piperidiny C<sub>A</sub>-3,5<sup>min</sup>), 33.8 (cyclohexenyl C-6), 33.1 (piperidiny C<sub>B</sub>-3,5<sup>min</sup>), 32.9 (piperidiny C<sub>B</sub>-3,5<sup>maj</sup>), 31.1 (cyclohexenyl C-4<sup>maj</sup>), 31.0 (cyclohexenyl C-4<sup>min</sup>), 20.7 (propenyl C-3<sup>maj</sup>), 20.6 (propenyl C-3<sup>min</sup>), 19.9 (cyclohexenyl 2-methyl<sup>maj</sup>), 19.8 (cyclohexenyl 2-methyl<sup>min</sup>);  $\delta_F$  (470 MHz, CDCl<sub>3</sub>): 66.3 (SO<sub>2</sub>F<sup>min</sup>), 66.1 (SO<sub>2</sub>F<sup>maj</sup>); HRMS found MNa<sup>+</sup> 534.2077. C<sub>29</sub>H<sub>34</sub>FNO<sub>4</sub>S requires MNa, 534.2085.

#### 4-[1-(5-Methoxy-1*H*-indol-3-yl)-2-oxo-2-(4-phenylpiperidin-1-yl)ethyl]benzene-1-sulfonyl fluoride (2-15a)

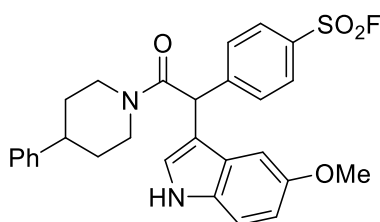

Prepared according to general procedure A – implementation of reaction array, diazo substrate **D2** (100 mM), co-substrate **C15** (500 mM) and Rh<sub>2</sub>(cap)<sub>4</sub> (1 mM) gave a crude material. This was then purified via preparative HPLC eluting with gradient elution: 5:95 → 55:45 → 75:25 → 95:5 MeCN–H<sub>2</sub>O to give the *indole derivative* **2-15a** (1.10 mg, 11%, *rotamers* 51:49 by <sup>1</sup>H NMR) as a colourless oil. *R*<sub>f</sub> 0.48 (EtOAc–hexane 50:50).  $\nu_{\max}/\text{cm}^{-1}$ : 3416, 2925, 1637, 1484, 1440, 1410, 1212, 1166;  $\delta_H$  (500 MHz, CDCl<sub>3</sub>): 9.10 (1H, br. s, NH<sup>maj</sup>), 9.04 (1H, br. s, NH<sup>min</sup>), 7.96 (2H, d, *J* 8.5 Hz, aryl 2,6-H<sup>min</sup>), 7.94 (2H, d, *J* 8.5 Hz, aryl 2,6-H<sup>maj</sup>), 7.58 (2H, d, *J* 8.5 Hz, aryl 3,5-H<sup>min</sup>), 7.54 (2H, d, *J* 8.5 Hz, aryl 3,5-H<sup>maj</sup>), 7.35-7.30 (2H, m, phenyl 3,5-H<sup>maj</sup>), 7.29-7.17 (6H, m,

phenyl 3,5-H<sup>min</sup>, phenyl 4-H and indolyl 7-H), 7.15 (2H, d, *J* 7.4 Hz, phenyl 2,6-H<sup>min</sup>), 7.08 (2H, d, *J* 7.4 Hz, phenyl 2,6-H<sup>maj</sup>), 7.04 (1H, d, *J* 2.5 Hz, indolyl 4-H<sup>maj</sup>), 7.03 (1H, d, *J* 2.5 Hz, indolyl 4-H<sup>min</sup>), 6.89-6.84 (2H, m, indolyl 6-H), 6.40 (1H, d, *J* 1.5 Hz, indolyl 2-H<sup>maj</sup>), 6.37 (1H, d, *J* 1.5 Hz, indolyl 2-H<sup>min</sup>), 5.66 (1H, s, 1-H<sup>maj</sup>), 5.64 (1H, s, 1-H<sup>min</sup>), 4.89-4.82 (2H, m piperidiny 2-H<sub>A</sub> or piperidiny 6-H<sub>A</sub>), 4.29-4.18 (2H, m, piperidiny 2-H<sub>A</sub> or piperidiny 6-H<sub>A</sub>), 3.84 (6H, s, OMe), 3.26 (2H, app. tt, *J* 13.5 and 2.5 Hz, piperidiny 2-H<sub>B</sub> or piperidiny 6-H<sub>B</sub>), 2.83-2.70 (4H, m, piperidiny 2-H<sub>B</sub> or piperidiny 6-H<sub>B</sub> and piperidiny 4-H), 2.04-1.82 (4H, m piperidiny 3,5-H<sub>A</sub>), 1.73-1.56 (2H, m, piperidiny 3-H<sub>B</sub> or piperidiny 5-H<sub>B</sub>), 1.53-1.39 (2H, m, piperidiny 3-H<sub>B</sub> or piperidiny 5-H<sub>B</sub>);  $\delta_c$  (125 MHz, CDCl<sub>3</sub>): 168.6 (C-2), 154.6 (indolyl C-5), 147.7 (aryl C-4<sup>maj</sup>), 147.6 (aryl C-4<sup>min</sup>), 144.6 (phenyl C-1<sup>min</sup>), 144.5 (phenyl C-1<sup>maj</sup>), 134.4 (indolyl C-3a<sup>min</sup>), 134.3 (indolyl C-3a<sup>maj</sup>), 132.0 (d, *J* 24.8 Hz, aryl C-1<sup>maj</sup>), 131.9 (d, *J* 24.8 Hz, aryl C-1<sup>min</sup>), 131.80 (indolyl C-7a<sup>min</sup>), 131.77 (indolyl C-7a<sup>maj</sup>), 129.5 (aryl C<sub>2-3,5</sub><sup>min</sup>), 129.4 (aryl C<sub>2-3,5</sub><sup>maj</sup>), 129.1 (aryl C<sub>2-2,6</sub><sup>min</sup>), 129.0 (aryl C<sub>2-2,6</sub><sup>maj</sup>), 128.9 (phenyl C<sub>2-3,5</sub><sup>min</sup>), 128.8 (phenyl C<sub>2-3,5</sub><sup>maj</sup>), 128.5 (indolyl C-3<sup>min</sup>), 128.4 (indolyl C-3<sup>maj</sup>), 127.0 (phenyl C-4<sup>min</sup>), 126.84 (phenyl C-4<sup>maj</sup>), 126.80 (phenyl C<sub>2-2,6</sub><sup>maj</sup>), 126.7 (phenyl C<sub>2-2,6</sub>-H<sup>min</sup>), 112.83 (indolyl C-6<sup>maj</sup>), 112.79 (indolyl C-6<sup>min</sup>), 112.2 (indolyl C-7), 102.5 (indolyl C-2<sup>min</sup>), 102.4 (indolyl C-2<sup>maj</sup>), 102.31 (indolyl C-4<sup>maj</sup>), 102.28 (indolyl C-4<sup>min</sup>), 56.0 (OMe), 47.6 (piperidiny C<sub>A-2,6</sub><sup>maj</sup>), 47.4 (piperidiny C<sub>A-2,6</sub><sup>min</sup>), 47.0 (C-1<sup>min</sup>), 46.9 (C-1<sup>maj</sup>), 43.7 (piperidiny C<sub>B-2,6</sub><sup>maj</sup>), 43.4 (piperidiny C<sub>B-2,6</sub><sup>min</sup>), 42.7 (piperidiny C-4<sup>maj</sup>), 42.5 (piperidiny C-4<sup>min</sup>), 34.1 (piperidiny C<sub>A-3,5</sub><sup>maj</sup>), 33.8 (piperidiny C<sub>A-3,5</sub><sup>min</sup>), 33.0 (piperidiny C<sub>B-3,5</sub><sup>maj</sup>), 32.9 (piperidiny C<sub>B-3,5</sub><sup>min</sup>);  $\delta_F$  (470 MHz, CDCl<sub>3</sub>): 66.22 (SO<sub>2</sub>F<sup>min</sup>), 66.16 (SO<sub>2</sub>F<sup>maj</sup>); HRMS found MH<sup>+</sup> 507.1755. C<sub>28</sub>H<sub>27</sub>FN<sub>2</sub>O<sub>4</sub>S requires *MH*, 507.1748.

Also obtained was the *indole derivative* 4-[1-(5-methoxy-1H-indol-1-yl)-2-oxo-2-(4-phenylpiperidin-1-yl)ethyl]benzene-1-sulfonyl fluoride **2-15b** (0.10 mg, 1%, *rotamers* 65:35 by <sup>1</sup>H NMR) as a colourless oil. *R*<sub>f</sub> 0.43 (EtOAc–hexane 50:50).  $\nu_{\max}/\text{cm}^{-1}$ : 2936, 2852, 1640, 1596, 1453, 1412, 1213, 1166, 1099;  $\delta_H$  (500 MHz, CDCl<sub>3</sub>): 7.98-7.92 (4H, m, aryl C<sub>2-2,6</sub>), 7.34-7.27 (4H, m, aryl C<sub>2-3,5</sub>), 7.25-7.22 (6H, m, phenyl 3,5-H and indolyl 2-H), 7.22 (8H, phenyl 2,6-H<sup>min</sup> phenyl 4-H and indolyl 4,7-H), 6.93 (2H, d, *J* 7.1 Hz, phenyl C<sub>2-2,6</sub><sup>maj</sup>), 6.90-6.84 (2H, m, indolyl 6-H), 6.63 (1H, dd, *J* 3.2 and 0.7 Hz, indolyl 3-H<sup>maj</sup>), 6.49 (1H, dd, *J* 3.2 and 0.7 Hz, indolyl 3-H<sup>min</sup>), 6.47 (2H, s, 1-H), 4.89-4.79 (2H, m, piperidiny 2-H<sub>A</sub> or piperidiny 6-H<sub>A</sub>), 3.86 (3H, s, OMe<sup>maj</sup>), 3.85 (3H,



s, OMe<sup>min</sup>), 3.85-3.74 (2H, m piperidiny 2-H<sub>A</sub> or piperidiny 6-H<sub>A</sub>), 3.19 (1H, td, *J* 13.1 and 2.6 Hz, piperidiny 2-H<sub>B</sub><sup>maj</sup> or piperidiny 6-H<sub>B</sub><sup>maj</sup>), 2.91 (1H, td, *J* 13.1 and 2.6 Hz, piperidiny 2-H<sub>B</sub><sup>min</sup> or piperidiny 6-H<sub>B</sub><sup>min</sup>), 2.86-2.62 (4H, m, piperidiny 2-H<sub>B</sub> or piperidiny 6-H<sub>B</sub> and piperidiny 4-H), 2.03-1.96 (1H, m, piperidiny 3-H<sub>A</sub><sup>min</sup> or piperidiny 6-H<sub>A</sub><sup>min</sup>), 1.91-1.82 (2H, m, piperidiny 3-H<sub>A</sub> or piperidiny 6-H<sub>A</sub>), 1.77-1.53 (2H, m, piperidiny 3-H<sub>A</sub><sup>maj</sup> or piperidiny 6-H<sub>A</sub><sup>maj</sup>, piperidiny 3-H<sub>B</sub><sup>min</sup> or piperidiny 6-H<sub>B</sub><sup>min</sup>), 1.50-1.43 (2H, m, piperidiny 3-H<sub>B</sub> or piperidiny 6-H<sub>B</sub>), 0.70 (1H, qd, *J* 12.8 and 4.2 Hz, piperidiny 3-H<sub>B</sub><sup>maj</sup> or piperidiny 6-H<sub>B</sub><sup>maj</sup>);  $\delta_C$  (125 MHz, CDCl<sub>3</sub>): 165.3 (C-2), 155.0 (indolyl C-5), 145.7 (aryl C-4<sup>min</sup>), 145.5 (aryl C-4<sup>min</sup>), 144.64 (phenyl C-1<sup>min</sup>), 144.56 (phenyl C-1<sup>maj</sup>), 130.9 (indolyl C-7a), 129.7 (indolyl C-3a<sup>min</sup>), 129.6 (indolyl C-3a<sup>maj</sup>), 128.89 (aryl C<sub>2</sub>-2,6<sup>min</sup>), 128.85 (aryl C<sub>2</sub>-2,6<sup>maj</sup>), 128.8 (aryl C<sub>2</sub>-3,5<sup>min</sup>), 128.72 (aryl C<sub>2</sub>-3,5<sup>maj</sup>), 128.69 (indolyl C-2), 127.2 (phenyl C<sub>2</sub>-3,5), 126.92 (phenyl C-4<sup>min</sup>), 126.9 (phenyl C-4<sup>maj</sup>), 126.8 (phenyl C<sub>2</sub>-2,6), 113.2 (indolyl C-6<sup>maj</sup>), 113.1 (indolyl C-6<sup>min</sup>), 110.0 (indolyl C-7), 103.8 (indolyl C-3<sup>maj</sup>), 103.6 (indolyl C-3<sup>min</sup>), 103.5 (indolyl C-4<sup>maj</sup>), 103.4 (indolyl C-4<sup>min</sup>), 60.3 (C-1<sup>maj</sup>), 60.2 (C-1<sup>min</sup>), 56.0 (OMe<sup>maj</sup>), 55.9 (OMe<sup>min</sup>), 47.3 (piperidiny C<sub>A</sub>-2,6), 44.1 (piperidiny C<sub>B</sub>-2,6<sup>maj</sup>), 43.6 (piperidiny C<sub>B</sub>-2,6<sup>min</sup>), 42.6 (piperidiny C-4<sup>maj</sup>), 42.3 (piperidiny C-4<sup>min</sup>), 33.8 (piperidiny C<sub>A</sub>-3,5), 33.2 (piperidiny C<sub>B</sub>-3,5<sup>min</sup>), 32.8 (piperidiny C<sub>B</sub>-3,5<sup>maj</sup>);  $\delta_F$  (470 MHz, CDCl<sub>3</sub>): 66.1 (SO<sub>2</sub>F); HRMS found MH<sup>+</sup> 507.1751. C<sub>28</sub>H<sub>27</sub>FN<sub>2</sub>O<sub>4</sub>S requires *MH*, 507.1748. Aryl C-1 not observed by <sup>13</sup>C NMR (125 MHz).

**4-[2-(2,3-Dihydro-1*H*-isoindol-2-yl)-1-(naphthalen-1-yloxy)-2-oxoethyl]benzene-1-sulfonyl fluoride (3-4a) and 4-[2-(2,3-dihydro-1*H*-isoindol-2-yl)-1-(1-hydroxynaphthalen-2-yl)-2-oxoethyl]benzene-1-sulfonyl fluoride (3-4b)**

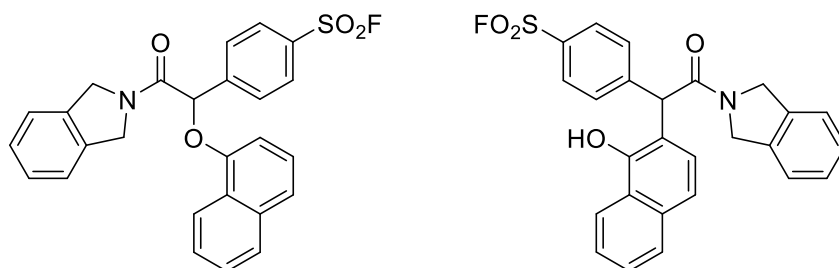

Prepared according to general procedure A – implementation of reaction array, diazo substrate **D3** (100 mM), co-substrate **C4** (500 mM) and Rh<sub>2</sub>(cap)<sub>4</sub> (1 mM) gave a crude material. This was then purified via preparative HPLC eluting with gradient elution:

5:95 → 55:45 → 75:25 → 95:5 MeCN–H<sub>2</sub>O to give the *naphthalene derivative* **3-4a** and **3-4b** (0.50 mg, 5%, *regioisomers* 51:49 by <sup>1</sup>H NMR) as a colourless oil. *R*<sub>f</sub> 0.63 (EtOAc–hexane 50:50). *v*<sub>max</sub>/cm<sup>-1</sup>: 3061, 2925, 2866, 1642, 1590, 1441, 1410, 1265, 1213, 1099; *δ*<sub>H</sub> (500 MHz, CDCl<sub>3</sub>): 10.72 (1H, br. s, OH<sup>min</sup>), 8.48-8.43 (1H, m, naphthanenyl 8-H<sup>min</sup>), 8.35-8.32 (1H, m, naphthanenyl 8-H<sup>maj</sup>), 8.12 (2H, d, *J* 8.7 Hz, phenyl 2,6-H<sup>maj</sup>), 8.07 (2H, d, *J* 8.7 Hz, naphthanenyl 3,5-H<sup>maj</sup>), 7.92 (2H, d, *J* 8.6 Hz, phenyl 2,6-H<sup>min</sup>), 7.88-7.85 (1H, m, naphthanenyl 5-H<sup>maj</sup>), 7.81-7.78 (1H, m, naphthanenyl 5-H<sup>min</sup>), 7.65-7.27 (8H, m, phenyl 3,5-H<sup>min</sup> and naphthanenyl 4,6,7-H), 7.40-7.18 (9H, m, naphthanenyl 3-H<sup>maj</sup> and isoindolyl 4,5,6,7-H), 7.09 (1H, d, *J* 7.4 Hz, naphthanenyl 3-H<sup>min</sup>), 6.99 (1H, d, *J* 7.6 Hz, naphthanenyl 2-H<sup>maj</sup>), 6.21 (1H, s, 1-H<sup>maj</sup>), 5.40 (1H, s, 1-H<sup>min</sup>), 5.18 (2H, s, isoindolyl 1-H<sub>2</sub><sup>maj</sup> or isoindolyl 3-H<sub>2</sub><sup>maj</sup>), 4.08-4.72 (6H, m, isoindolyl 1-H<sub>2</sub><sup>min</sup> or isoindolyl 3-H<sub>2</sub><sup>min</sup> and isoindolyl 1,3-H<sub>2</sub>); *δ*<sub>C</sub> (125 MHz, CDCl<sub>3</sub>): 172.7 (C-2<sup>min</sup>), 167.3 (C-2<sup>maj</sup>), 153.4 (naphthanenyl C-1<sup>min</sup>), 152.1 (naphthanenyl C-1<sup>maj</sup>), 146.1 (phenyl C-4<sup>min</sup>), 143.4 (phenyl C-4<sup>maj</sup>), 136.1 (naphthanenyl C-4<sup>maj</sup>), 135.6 (naphthanenyl C-4<sup>min</sup>), 135.00 (isoindolyl C<sub>A</sub>-3a,7a<sup>maj</sup>), 134.96 (isoindolyl C<sub>A</sub>-3a,7a<sup>min</sup>), 134.9 (isoindolyl C<sub>B</sub>-3a,7a<sup>min</sup>), 134.8 (isoindolyl C<sub>B</sub>-3a,7a<sup>maj</sup>), 133.3 (d, *J* 25.0 Hz, phenyl C-1<sup>maj</sup>), 132.0 (d, *J* 24.8 Hz, phenyl C-1<sup>min</sup>), 129.2 (aryl C-H), 129.13 (aryl C-H), 129.09 (aryl C-H), 128.9 (aryl C-H), 128.7 (aryl C-H), 128.2 (aryl C-H), 128.14 (aryl C-H), 128.05 (aryl C-H), 127.8 (aryl C-H), 127.6 (aryl C-H), 127.29 (aryl C-H), 127.27 (aryl C-H), 127.1 (aryl C-H), 126.3 (aryl C-H), 125.9 (aryl C-H), 125.8 (aryl C-H), 125.4 (aryl C<sub>q</sub>), 123.3 (aryl C-H), 123.2 (aryl C-H), 122.9 (aryl C-H), 122.8 (aryl C-H), 122.7 (aryl C-H), 122.5 (aryl C-H), 121.4 (aryl C-H), 120.3 (aryl C-H), 114.5 (aryl C<sub>q</sub>), 106.5 (naphthanenyl C-2<sup>maj</sup>), 80.1 (C-1<sup>maj</sup>), 55.2 (C-1<sup>min</sup>), 53.9 (isoindolyl C<sub>A</sub>-1,3<sup>min</sup>), 53.8 (isoindolyl C<sub>A</sub>-1,3<sup>maj</sup>), 53.2 (isoindolyl C<sub>B</sub>-1,3<sup>maj</sup>), 51.9 (isoindolyl C<sub>B</sub>-1,3<sup>min</sup>); *δ*<sub>F</sub> (470 MHz, CDCl<sub>3</sub>): 66.14 (SO<sub>2</sub>F<sup>min</sup>), 66.13 (SO<sub>2</sub>F<sup>maj</sup>); HRMS found MH<sup>+</sup> 462.1167. C<sub>26</sub>H<sub>20</sub>FNO<sub>4</sub>S requires *MH*, 462.1170. Full assignment of <sup>13</sup>C NMR not possible due to complexity of the NMR spectra.

**4-[1-(5-Methoxy-1*H*-indol-3-yl)-2-(morpholin-4-yl)-2-oxoethyl]benzene-1-sulfonyl fluoride (1-15a) and 4-[1-(5-methoxy-1*H*-indol-1-yl)-2-(morpholin-4-yl)-2-oxoethyl]benzene-1-sulfonyl fluoride (1-15b)**

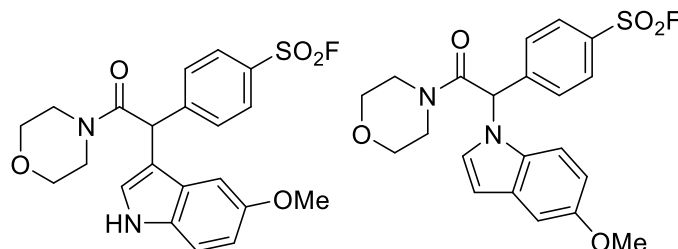

Prepared according to general procedure A – implementation of reaction array, diazo substrate **D1** (100 mM), co-substrate **C15** (500 mM) and Rh<sub>2</sub>(piv)<sub>4</sub> (1 mM) gave a crude material. This was then purified via preparative HPLC eluting with gradient elution: 5:95 → 35:65 → 60:40 → 95:5 MeCN–H<sub>2</sub>O to give the *indole derivative* **1-15a** (0.50 mg, 6%) as a colourless oil. *R*<sub>f</sub> 0.09 (EtOAc–hexane 50:50). *v*<sub>max</sub>/cm<sup>-1</sup>: 3325, 2923, 2856, 1640, 1485, 1439, 1409, 1212, 1115, 1033; δ<sub>H</sub> (500 MHz, CDCl<sub>3</sub>): 8.88 (1H, br. s, NH), 7.94 (2H, d, *J* 8.5 Hz, aryl 2,6-H), 7.51 (2H, d, *J* 8.5 Hz, aryl 3,5-H), 7.24 (1H, d, *J* 8.8 Hz, indolyl 7-H), 7.03 (1H, d, *J* 2.4 Hz, indolyl 4-H), 6.86 (1H, dd, *J* 8.8 and 2.4 Hz, indolyl 6-H), 6.37 (1H, d, *J* 1.8 Hz, indolyl 2-H), 5.53 (1H, s, 1-H), 3.84 (3H, s, OMe), 3.81–5.51 (8H, m, morpholinyl 2,6-H<sub>2</sub> and morpholinyl 3,5-H<sub>2</sub>); δ<sub>C</sub> (125 MHz, CDCl<sub>3</sub>): 168.9 (C-2), 154.7 (indolyl C-5), 147.1 (aryl C-4), 133.8 (indolyl C-3a), 132.2 (d, *J* 24.9 Hz, aryl C-1), 131.8 (indolyl C-7a), 129.5 (aryl C<sub>2</sub>-3,5), 129.1 (aryl C<sub>2</sub>-2,6), 128.4 (indolyl C-3), 113.0 (indolyl C-6), 112.2 (indolyl C-7), 102.6 (indolyl C-2), 102.3 (indolyl C-4), 66.9 (morpholinyl C<sub>A</sub>-2,6), 66.7 (morpholinyl C<sub>B</sub>-2,6), 56.0 (OMe), 47.1 (morpholinyl C<sub>A</sub>-3,5), 47.0 (C-1), 42.9 (morpholinyl C<sub>B</sub>-3,5); δ<sub>F</sub> (470 MHz, CDCl<sub>3</sub>): 66.2 (SO<sub>2</sub>F); HRMS found MH<sup>+</sup> 433.1223. C<sub>21</sub>H<sub>21</sub>FN<sub>2</sub>O<sub>5</sub>S requires *MH*, 433.1228.

Also obtained was the *indole derivative* **1-15b** (0.70 mg, 8%) as a colourless oil. *R*<sub>f</sub> 0.14 (EtOAc–hexane 50:50). *v*<sub>max</sub>/cm<sup>-1</sup>: 2925, 2857, 1655, 1576, 1479, 1411, 1242, 1213, 1115, 1033; δ<sub>H</sub> (500 MHz, CDCl<sub>3</sub>): 7.94 (2H, d, *J* 8.5 Hz, aryl 2,6-H), 7.25 (2H, d, *J* 8.5 Hz, aryl 3,5-H), 7.17 (1H, d, *J* 3.3 Hz, indolyl 2-H), 7.14 (1H, d, *J* 2.4 Hz, indolyl 4-H), 7.07 (1H, d, *J* 8.9 Hz, indolyl 7-H), 6.89 (1H, dd, *J* 8.9 and 2.4 Hz, indolyl 6-H), 6.61 (1H, dd, *J* 3.3 and 0.7 Hz, indolyl 3-H), 6.36 (1H, s, 1-H), 3.92–3.86 (1H, m, morpholinyl 3-H<sub>A</sub> or morpholinyl 5-H<sub>A</sub>), 3.85 (3H, s, OMe), 3.75 (1H, ddd, *J* 10.9, 5.5 and 2.8 Hz, morpholinyl 2-H<sub>A</sub> or morpholinyl 6-H<sub>A</sub>), 3.65–3.54 (2H, m, morpholinyl 3-

H<sub>B</sub> or morpholinyl 5-H<sub>B</sub> and morpholinyl 2-H<sub>B</sub> or morpholinyl 6-H<sub>B</sub>), 3.49 (1H, ddd, *J* 11.6, 5.5 and 3.1 Hz, morpholinyl 2-H<sub>A</sub> or morpholinyl 6-H<sub>A</sub>), 3.38 (1H, ddd, *J* 13.1, 7.6 and 3.1 Hz, morpholinyl 3-H<sub>A</sub> or morpholinyl 5-H<sub>A</sub>), 3.22 (1H, ddd, *J* 13.1, 5.5 and 3.1 Hz, morpholinyl 3-H<sub>B</sub> or morpholinyl 5-H<sub>B</sub>), 3.19-3.13 (1H, m, 2-H<sub>B</sub> or morpholinyl 6-H<sub>B</sub>);  $\delta_c$  (125 MHz, CDCl<sub>3</sub>): 165.7 (C-2), 155.1 (indolyl C-5), 145.2 (aryl C-4), 132.9 (d, *J* 24.9 Hz, aryl C-1), 130.7 (indolyl C-7a), 129.7 (indolyl C-3a), 128.9 (aryl C<sub>2</sub>-2,6), 128.8 (aryl C<sub>2</sub>-3,5), 126.7 (indolyl C-2), 113.3 (indolyl C-6), 109.7 (indolyl C-7), 104.0 (indolyl C-3), 103.5 (indolyl C-4), 66.8 (morpholinyl C<sub>A</sub>-2,6), 66.3 (morpholinyl C<sub>B</sub>-2,6), 60.1 (C-1), 55.9 (OMe), 46.4 (morpholinyl C<sub>A</sub>-3,5), 43.3 (morpholinyl C<sub>B</sub>-3,5);  $\delta_F$  (470 MHz, CDCl<sub>3</sub>): 66.1 (SO<sub>2</sub>F); HRMS found MH<sup>+</sup> 433.1226. C<sub>21</sub>H<sub>21</sub>FN<sub>2</sub>O<sub>5</sub>S requires *MH*, 433.1228.

#### 4-(1-((4-Chlorobenzyl)oxy)-2-morpholino-2-oxoethyl)phenyl sulfurofluoridate (4-1)

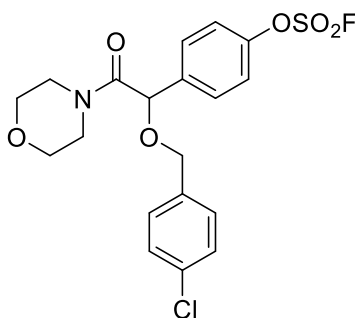

Prepared according to general procedure A - implementation of reaction array with diazo substrate **D4** (100 mM), co-substrate **C1** (500 mM) and Rh<sub>2</sub>(pfb)<sub>4</sub> (1.0 mM) gave a crude material which was purified by reverse phase MDAP-HPLC eluting with H<sub>2</sub>O/CH<sub>3</sub>CN (with 0.1% formic acid) over 12 min to give the *sulfurofluoridate* as an orange oil (5.2 mg, 56%).  $\nu_{max}/cm^{-1}$  2922, 2854, 1647, 1500, 1450, 1367, 1272, 1234, 1181, 1144, 1115, 1089, 1016, 916, 813, 578 and 541.  $\delta_H$  (500 MHz, CD<sub>3</sub>OD) 7.65-7.62 (2H, m, phenyl 3,5-H<sub>2</sub>), 7.51-7.49 (2H, m, phenyl 2,6-H<sub>2</sub>), 7.40-7.36 (4H, m, chlorobenzyl 3,5-H<sub>2</sub>, 2,6-H<sub>2</sub>), 5.44 (1H, s, oxoethyl 1-H), 4.65 (1H, d, *J* 11.9 Hz, benzylic 1-H<sub>A</sub>), 4.58 (1H, d, *J* 11.7 Hz, benzylic 1-H<sub>B</sub>), 3.64-3.39 (8H, m, morpholino 2,6-H<sub>4</sub> and 2,5-H<sub>4</sub>).  $\delta_c$  (125 MHz, CD<sub>3</sub>OD) 170.1 (oxoethyl C-2), 151.4 (phenyl C-1), 139.1 (phenyl C-4), 137.4 (chlorobenzyl C-1), 134.9 (chlorobenzyl C-4), 130.9 (phenyl C<sub>2</sub>-3,5), 130.5 (chlorobenzyl C<sub>2</sub>-2,6), 129.6 (chlorobenzyl C<sub>2</sub>-3,5), 122.5 (phenyl C<sub>2</sub>-2,6), 80.3 (oxoethyl C-1), 72.3 (benzylic C), 67.7 (morpholino C<sub>2</sub>-2,6),

67.4 (morpholino C<sub>2</sub>-2,6), 47.1 (morpholino C<sub>2</sub>-3,5), 44.0 (morpholino C<sub>2</sub>-5,3);  $\delta_F$  (376 MHz, CD<sub>3</sub>OD) 35.7 (SO<sub>3</sub>F). HRMS found MH<sup>+</sup> 444.0688. C<sub>19</sub>H<sub>19</sub>ClFNO<sub>6</sub>S requires *MH* 444.0678.

**4-(1-(3-(2-Hydroxyethyl)-1H-indol-1-yl)-2-morpholino-2-oxoethyl)phenyl sulfurofluoridate (4-3)**

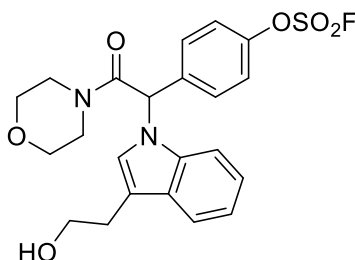

Prepared according to general procedure A - implementation of reaction array with diazo substrate **D4** (100 mM), co-substrate **C3** (500 mM) and Rh<sub>2</sub>(pfb)<sub>4</sub> (1.0 mM) gave a crude material which was purified by reverse phase MDAP-HPLC eluting with H<sub>2</sub>O/CH<sub>3</sub>CN (with 0.1% formic acid) over 12 min to give the *sulfurofluoridate* as a colourless oil (2.12 mg, 23%).  $\nu_{\max}/\text{cm}^{-1}$  3444, 2924, 2856, 1650, 1503, 1449, 1361, 1302, 1273, 1233, 1184, 1144, 1114, 1036, 1018, 916, 816, 744, 580, 570, 543, 515 and 428.  $\delta_H$  (500 MHz, CD<sub>3</sub>OD) 7.63-7.61 (1H, m, indolyl 4-H), 7.46-7.43 (2H, m, phenyl 2,6-H<sub>2</sub>), 7.38-7.34, (2H, m, phenyl 3,5-H<sub>2</sub>), 7.19-7.16 (1H, m, indolyl 6-H), 7.12-7.09 (1H, m, indolyl 5-H), 7.01 (1H, s, indolyl 2-H), 6.86 (1H, s, oxoethyl 1-H), 3.82 (2H, t, *J* 7.0, hydroxyethyl 1-H<sub>2</sub>), 3.80-3.76 (1H, m, morpholino 3-H<sup>a</sup> or 5-H<sup>b</sup>), 3.72-3.68 (1H, m, morpholino 2-H<sup>a</sup> or 6-H<sup>b</sup>), 3.66-3.57 (2H, m, morpholino 3-H<sup>b</sup> or 5-H<sup>a</sup> and 2-H<sup>b</sup> or 6-H<sup>a</sup>), 3.47-3.38 (3H, m, morpholino 3,5-H<sub>2</sub><sup>a or b</sup> and 2- or 6-H<sup>a or b</sup>), 3.28-3.22 (1H, m, morpholino 2- or 6-H<sup>a or b</sup>), 3.02-2.93 (2H, m, hydroxyethyl 2-H<sub>2</sub>).  $\delta_C$  (125 MHz, CD<sub>3</sub>OD) 169.0 (oxoethyl C-2), 151.2 (phenyl C-1), 139.1 (phenyl C-4), 137.9 (indolyl C-7a), 131.4 (phenyl C<sub>2</sub>-3,5), 129.9 (indolyl C-3a), 125.8 (indolyl C-2), 122.4 (indolyl C-6), 122.3 (phenyl C<sub>2</sub>-2,6) 120.9 (indolyl C-5), 120.2 (indolyl C-4), 114.8 (indolyl C-3), 110.5 (indolyl C-7), 67.7 (morpholino C-2 or C-6), 67.3 (morpholino C-2 or C-6), 63.3 (hydroxyethyl C-1), 60.2 (oxoethyl C-1), 47.6 (morpholino C-3 or C-5), 44.3 (morpholino C-3 or C-5), 29.6 (hydroxyethyl C-2).  $\delta_F$  (376 MHz, CD<sub>3</sub>OD) 35.7 (SO<sub>3</sub>F).

**4-(1-((2-Chloro-5-fluorobenzyl)oxy)-2-morpholino-2-oxoethyl)phenyl  
sulfurofluoridate (4-5)**

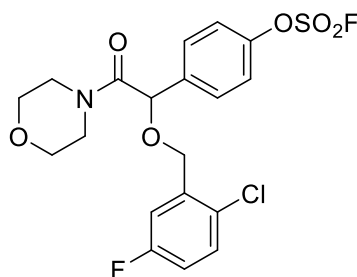

Prepared according to general procedure A - implementation of reaction array with diazo substrate **D4** (100 mM), co-substrate **C5** (500 mM) and  $\text{Rh}_2(\text{cap})_4$  (1.0 mM) gave a crude material which was purified by reverse phase MDAP-HPLC eluting with  $\text{H}_2\text{O}/\text{CH}_3\text{CN}$  (with 0.1% formic acid) over 12 min to give the *sulfurofluoridate* as a colourless oil (0.77 mg, 8%).  $\nu_{\text{max}}/\text{cm}^{-1}$  2924, 2854, 1649, 1501, 1450, 1271, 1234, 1182, 1145, 1116, 1018, 916, 813 and 578.  $\delta_{\text{H}}$  (500 MHz,  $\text{CD}_3\text{OD}$ ) 7.68-7.65 (2H, m, phenyl 3,5- $\text{H}_2$ ), 7.53-7.50 (2H, m, phenyl 2,6- $\text{H}_2$ ), 7.41 (1H, dd,  $J$  8.8 Hz and 5.0 Hz, benzyl 3-H), 7.34 (1H, dd,  $J$  9.3 Hz and 3.1 Hz, benzyl 6-H), 7.10-7.06 (1H, m, benzyl 4-H), 5.6 (1H, s, oxoethyl 1-H), 4.75 (1H, d,  $J$  12.7 Hz, benzylic- $\text{H}_A$ ), 4.67 (1H, d,  $J$  12.8 Hz, benzylic- $\text{H}_B$ ), 3.68-3.54 (4H, m, morpholino 2,6- $\text{H}_2^{\text{a or b}}$ ), 3.52-3.46 (2H, m, morpholino 3,5- $\text{H}_2^{\text{a or b}}$  or 2,6- $\text{H}_2^{\text{a or b}}$ ), 3.44-3.36 (2H, m, morpholino 3,5- $\text{H}_2^{\text{a or b}}$ ).  $\delta_{\text{C}}$  (125 MHz,  $\text{CD}_3\text{OD}$ ) 151.5 (phenyl C-1), 138.8 (phenyl C-4), 132.0 (d,  $J$  8.4 Hz, benzyl C-1), 130.7 (phenyl C-2,3,5), 122.6 (phenyl C-2,6), 117.4 (d,  $J$  24.6 Hz, benzyl C-4), 117.1 (dd,  $J$  27.6 and 23.2 Hz, benzyl C-6), 80.6 (oxoethyl C-1), 69.7 (benzylic C-1), 67.7 (morpholino C-2 or C-6), 67.4 (morpholino C-2 or C-6), 47.2 (morpholino C-3 or C-5), 44.0 (morpholino C-3 or C-5).  $\delta_{\text{F}}$  (376 MHz,  $\text{CD}_3\text{OD}$ ) 35.8 ( $\text{SO}_3\text{F}$ ), - 116.9 ( $\text{CF}$ ). HRMS found  $\text{MNH}_4^+$  479.0855.  $\text{C}_{19}\text{H}_{18}\text{ClF}_2\text{NO}_6\text{S}$  requires  $\text{MNH}_4^+$ , 479.0850. N.B: Benzyl carbons C-2, C-3 and C-5 were not identified due to low sample concentration and fluorine splitting.

**4-(2-Morpholino-2-oxo-1-(pyrimidin-2-ylamino)ethyl)phenyl sulfurofluoridate (4-13)**

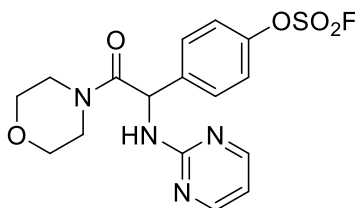

Prepared according to general procedure A - implementation of reaction array with diazo substrate **D4** (100 mM), co-substrate **C13** (500 mM) and  $\text{Rh}_2(\text{piv})_4$  (1.0 mM) gave a crude material which was purified by reverse phase MDAP-HPLC eluting with  $\text{H}_2\text{O}/\text{CH}_3\text{CN}$  (with 0.1% formic acid) over 12 min to give the *sulfurofluoridate* as an orange solid (2.75 mg, 35%).  $\nu_{\text{max}}/\text{cm}^{-1}$  2921, 2855, 1653, 1585, 1502, 1448, 1357, 1300, 1234, 1184, 1142, 1115, 1034, 915, 861, 800, 721, 599, 544 and 512.  $\delta_{\text{H}}$  (500 MHz,  $\text{CD}_3\text{OD}$ ) 8.32 (2H, d,  $J$  4.8 Hz, pyrimidinyl 4,6- $\text{H}_2$ ), 7.71-7.68 (2H, m, phenyl 3,5- $\text{H}_2$ ), 7.49-7.46 (2H, m, phenyl 2,6- $\text{H}_2$ ), 6.68 (1H, t,  $J$  4.8 Hz, pyrimidinyl 5-H), 6.12 (1H, s, oxoethyl 1-H), 3.73-3.55 (6H, m, morpholino 3- $\text{H}_2$ , 5- $\text{H}_2$ , 2- $\text{H}_\text{A}$  and 6- $\text{H}_\text{A}$ ), 3.48-3.43 (1H, m, morpholino 2- $\text{H}_\text{B}$ ) and 3.29 (1H, m, morpholino 6- $\text{H}_\text{B}$ ).  $\delta_{\text{C}}$  (125 MHz,  $\text{CD}_3\text{OD}$ ) 170.7 (oxoethyl C-2), 162.3 (pyrimidinyl C-2), 159.3 (pyrimidinyl C2-4,6), 151.2 (phenyl C-1), 140.2 (phenyl C-4), 131.6 (phenyl C2-3,5), 122.5 (phenyl C2-2,6), 122.7 (pyrimidinyl C-5), 67.6 (morpholino C-2 or C-6), 67.4 (morpholino C-2 or C-6), 55.9 (oxoethyl C-1), 47.4 (morpholino C-3 or C-5), 44.1 (morpholino C-3 or C-5);  $\delta_{\text{F}}$  (376 MHz,  $\text{CD}_3\text{OD}$ ) 35.7 ( $\text{SO}_3\text{F}$ ). HRMS found  $\text{MNa}^+$  419.0795.  $\text{C}_{16}\text{H}_{17}\text{FN}_4\text{O}_5\text{S}$  requires  $\text{MNa}^+$  419.0796.

**4-(2-Morpholino-2-oxo-1-(pent-1-yn-3-yloxy)ethyl)phenyl sulfurofluoridate (4-17)**

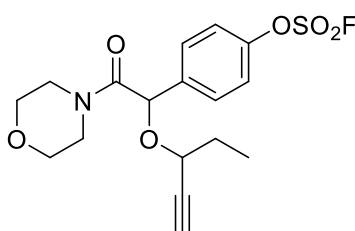

Prepared according to general procedure C - implementation of reaction array with diazo substrate **D4** (100 mM), co-substrate **C17** (500 mM) and  $\text{Rh}_2(\text{pfb})_4$  (1.0 mM) gave a crude material which was purified by reverse phase MDAP-HPLC eluting with

H<sub>2</sub>O/CH<sub>3</sub>CN (with 0.1% formic acid) over 12 min to give the *sulfurofluoridate* as a colourless oil (0.81 mg, 11%; 70:30 mixture of diastereomers A and B),  $\nu_{\max}/\text{cm}^{-1}$  3297, 3245, 3067, 2970, 2926, 2857, 1646, 1501, 1449, 1301, 1273, 1234, 1180, 1143, 1115, 1018, 916, 813, 665, 641, 595 and 542.  $\delta_{\text{H}}$  (500 MHz, CD<sub>3</sub>OD) 7.64-7.60 (2H, m, phenyl 3,5-H<sub>2</sub><sup>A+B</sup>), 7.51-7.48 (2H, m, phenyl 2,6-H<sub>2</sub><sup>A+B</sup>), 5.75 (0.3 H, s, ethyl 1-H<sup>B</sup>), 5.61 (0.7 H, s, ethyl 1-H<sup>A</sup>), 4.31-4.28 (0.3 H, app. m, pentynyl 3-H<sup>B</sup>), 4.03 (0.7 H, td,  $J$  6.3 and 2.0 Hz, pentynyl 3-H<sup>A</sup>), 3.76-3.39 (8H, m, morpholine 2-, 3-, 5- and 6-H<sub>2</sub><sup>A+B</sup>), 3.08 (0.7H, d,  $J$  2.1 Hz, pentynyl 1-H<sup>A</sup>), 3.04 (0.30, d,  $J$  2.1 Hz, pentynyl H-1<sup>B</sup>), 1.91-1.74 (2H, m, pentynyl 4-H<sub>2</sub><sup>A+B</sup>), 1.07 (1H, t,  $J$  7.5 Hz, pentynyl 5-H<sub>3</sub><sup>B</sup>) and 1.03 (2H, t,  $J$  7.4 Hz, pentynyl 5-H<sub>3</sub><sup>A</sup>).  $\delta_{\text{C}}$  (125 MHz, CD<sub>3</sub>OD) (diasteromer A assignments) 170.0 (oxoethyl C-2), 139.3 (phenyl C-1), 130.9 (phenyl C<sub>2</sub>-3,5), 130.3 (phenyl C-4), 122.3 (phenyl C<sub>2</sub>-2,6), 79.0 (pentynyl C-2), 77.4 (oxoethyl C-1), 71.2 (pentynyl C-3), 67.6 (morpholino C<sub>2</sub>-2,6), 47.5 (morpholino C-3 or C-5), 44.1 (morpholino C-3 or C-5), 29.9 (pentynyl C-4), 9.8 (pentynyl C-5);  $\delta_{\text{F}}$  (376 MHz, CD<sub>3</sub>OD) 35.7 (SO<sub>3</sub>F). HRMS found MNa<sup>+</sup> 408.0882. C<sub>17</sub>H<sub>20</sub>FNO<sub>6</sub>S [M+Na] requires MNa<sup>+</sup>, 408.0898.

#### 4-(2-Morpholino-2-oxo-1-(prop-2-yn-1-ylamino)ethyl)phenyl sulfurofluoridate (4-18)

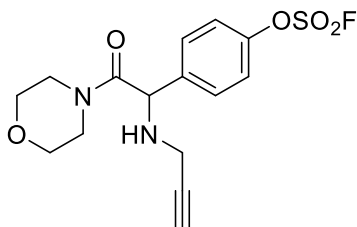

Prepared according to general procedure A - implementation of reaction array with diazo substrate **D4** (100 mM), co-substrate **C18** (500 mM) and Rh<sub>2</sub>(pfb)<sub>4</sub> (1.0 mM) gave a crude material which was purified by reverse phase MDAP-HPLC eluting with H<sub>2</sub>O/CH<sub>3</sub>CN (with 0.1% formic acid) over 12 min to give the *sulfurofluoridate* as a yellow oil (1.65 mg, 23%).  $\nu_{\max}/\text{cm}^{-1}$  3303, 2974, 2925, 2860, 1657, 1504, 1452, 1362, 1303, 1272, 1235, 1188, 1145, 1115, 1068, 1019, 917, 861, 833, 798, 760, 721, 589, 542 and 527.  $\delta_{\text{H}}$  (500 MHz, CD<sub>3</sub>OD) 7.60 (2H, d,  $J$  8.8 Hz, phenyl 3,5-H<sub>2</sub>), 7.49 (2H, d,  $J$  8.8 Hz, phenyl 2,6-H<sub>2</sub>), 5.01 (1H, s, oxoethyl 1-H), 3.65-3.25 (10H, m, morpholino 2,3,5,6-H<sub>8</sub> and propynyl 1-H<sub>2</sub>), 2.70 (1H, t,  $J$  2.4 Hz, propynyl 3-H).  $\delta_{\text{C}}$  (125 MHz, CD<sub>3</sub>OD) 171.2 (oxoethyl C-2), 151.3 (phenyl C-1), 140.2 (phenyl C-4), 131.5 (phenyl



C<sub>2</sub>-3,5), 122.6 (phenyl C<sub>2</sub>-2,6), 81.6 (propynyl C-2), 74.05 (propynyl C-3), 67.6 (morpholino C-2 or C-6), 67.4 (morpholino C-2 or C-6), 60.9 (C-1), 47.1 (morpholino C-3 or C-5), 44.0 (morpholino C-3 or C-5), 36.7 (propynyl C-1).  $\delta_F$  (376 MHz, CD<sub>3</sub>OD) 35.7 (SO<sub>3</sub>F). HRMS found MNa<sup>+</sup> 379.0722. C<sub>15</sub>H<sub>17</sub>FN<sub>2</sub>O<sub>5</sub>S requires MNa<sup>+</sup> 379.0734.

**2-(4-((2*H*-1,2,3-Triazol-2-yl)sulfonyl)phenyl)-2-((4-chlorobenzyl)oxy)-1-morpholinoethan-1-one (5-1)**

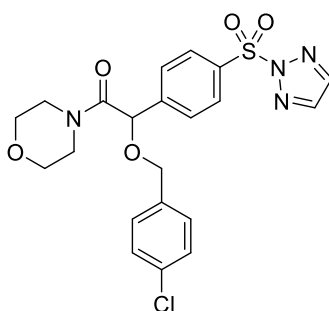

Prepared according to general procedure A - implementation of reaction array with diazo substrate **D5** (100 mM), co-substrate **C1** (500 mM) and Rh<sub>2</sub>(pfb)<sub>4</sub> (1.0 mM) gave a crude material which was purified by reverse phase MDAP-HPLC eluting with H<sub>2</sub>O/CH<sub>3</sub>CN (with 0.1% formic acid) over 12 min to give the *sulfonyl triazole* as a colourless solid (7.56 mg, 26%).  $\nu_{\max}/\text{cm}^{-1}$  3419, 2958, 2923, 2857, 2074, 1787, 1644, 1501, 1447, 1404, 1362, 1272, 1233, 1194, 1143, 1114, 1036, 1013, 954, 916, 844, 811, 765, 737, 659, 605 and 573.  $\delta_H$  (500 MHz, CD<sub>3</sub>OD) 8.07 (2H, d, *J* 8.6 Hz, phenyl 2,6-H<sub>2</sub>), 8.02 (2H, s, triazolyl, 4,5-H<sub>2</sub>), 7.71-7.69 (2H, m, phenyl 3,5-H<sub>2</sub>), 7.36 (4H, s, benzyl 2,3,5,6-H<sub>4</sub>), 5.46 (1H, s, ethanone 2-H), 4.64 (1H, d, *J* 11.8 Hz, benzylic-H<sub>A</sub>), 4.56 (1H, d, *J* 11.8 Hz, benzylic-H<sub>B</sub>), 3.61-3.34 (8H, m, morpholine, 2,3,5,6-H<sub>8</sub>).  $\delta_C$  (125 MHz, CD<sub>3</sub>OD) 169.5, 146.2, 140.3, 137.2, 137.1, 135.0, 130.9, 130.0, 129.7, 129.4, 80.6, 72.5, 67.6, 67.4, 47.1, 44.0. HRMS found MH<sup>+</sup> 477.0988. C<sub>21</sub>H<sub>21</sub>ClN<sub>4</sub>O<sub>5</sub>S requires MH, 477.0994.

## **General procedure for phenotypic *Trypanosoma brucei* cell culture**

### **a. *Trypanosoma brucei brucei* culture**

*Trypanosoma brucei brucei* (*T. b. brucei*) bloodstream form strain 427 were grown at 37 °C, in HMI-11 media in vented flasks in an atmosphere containing 5% CO<sub>2</sub>. The cells were passaged by transferring into fresh media as to not exceed a cell density of  $2 \times 10^6$  cells/mL.

### **b. Cryogenic storage of *Trypanosoma brucei brucei***

*T. b. brucei* (5 mL) at confluent density ( $2 \times 10^6$  cells/mL) was centrifuged at 800g for 5 minutes. The supernatant was removed, and cells resuspended in fresh media to a density of around  $2 \times 10^7$  cells/mL. A sterile solution of 60% glycerol in water was added to the cell suspension to give a final concentration of 10% glycerol. The cell suspension was transferred to a cryovial, into a Mr Frosty (ThermoFisher Scientific Cat No. 5100-0001) containing isopropan-1-ol, which was then surrounded with dry ice and left for 24 hours. Cryovials were then stored at -170 °C in the liquid nitrogen vapour phase for long term storage.

Cells were revived from cryogenic storage by first removing them from liquid nitrogen onto ice for 15 minutes. The cells were then allowed to warm to room temperature in a culture hood. Once defrosted, the cells were transferred into a non-vented 25 mL cell culture flask with fresh medium (9.4 mL) and left to grow in a 37 °C shaking incubator.

### **c. Standard *Trypanosoma brucei brucei* resazurin cell viability assay**

Cell viability assays were carried out in 96 well plates with 200 µL of culture per well. Cells were seeded at  $5 \times 10^3$  cells/mL and incubated with drug for 66 hours (in the same conditions as culturing). The plate included wells containing the positive control pentamidine (100 nM) and the negative control of 0.5% DMSO. After 66 hours, 10 µL of 1.1 mg/mL resazurin sodium salt (in PBS) was added and incubated for a further 6 hours (for a total assay duration of 72 hours). Plates were then read on a plate reader using excitation/emission 560/590 nm.

## Dose–response curves against *Trypanosoma brucei brucei*

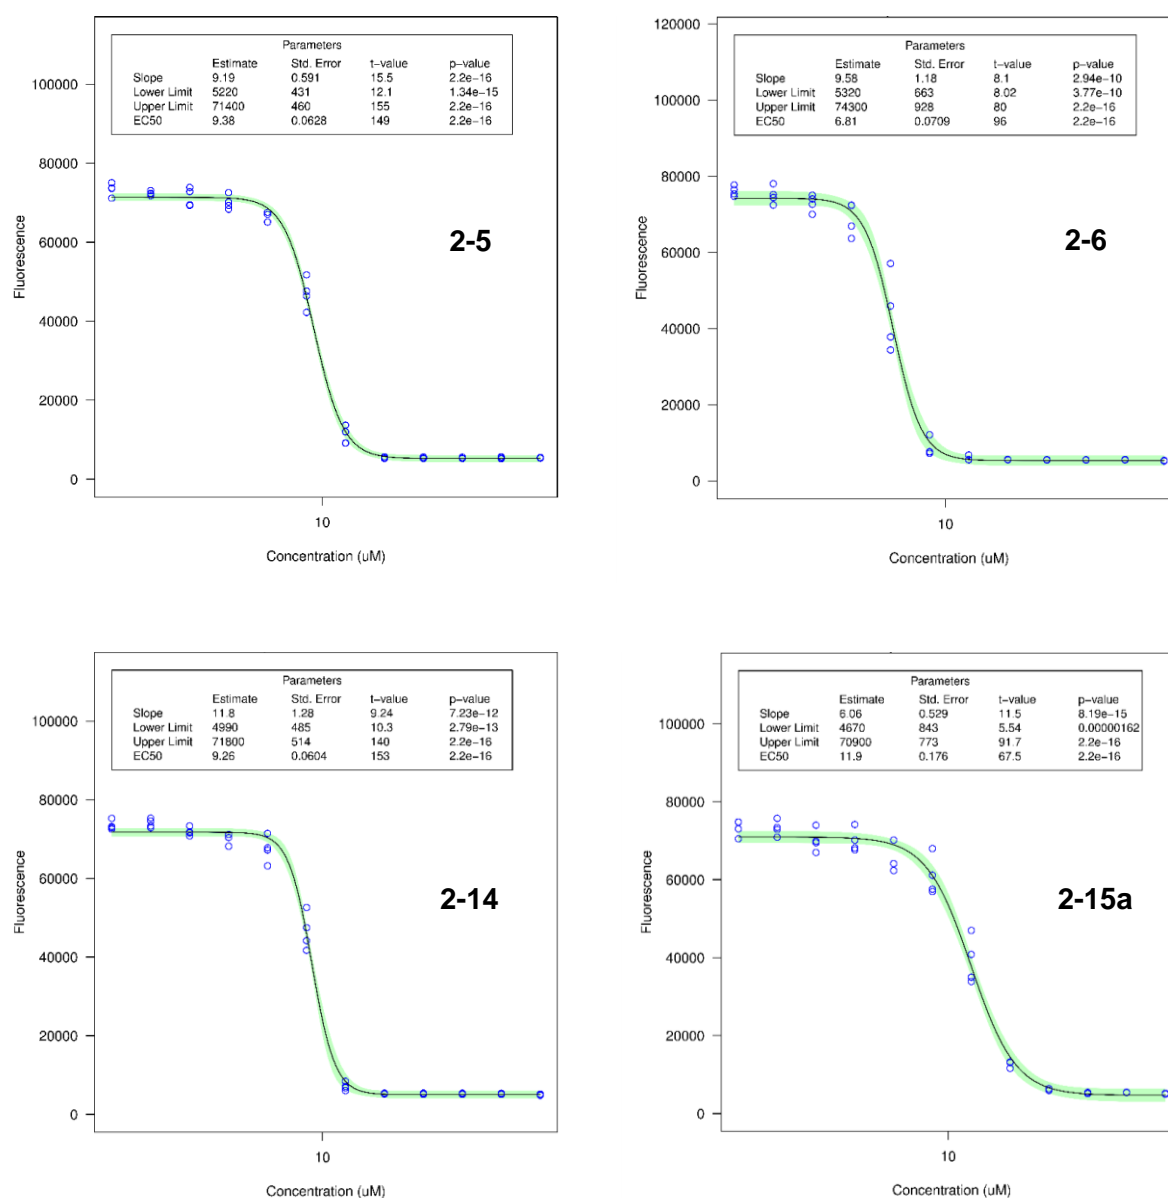

**Figure S1:** The dose–response curves for the most active chemical probes **2-5**, **2-6**, **2-14** and **2-15a** used to determine the EC<sub>50</sub> values for these probes against *T. brucei*.

## NMR spectra

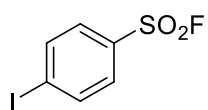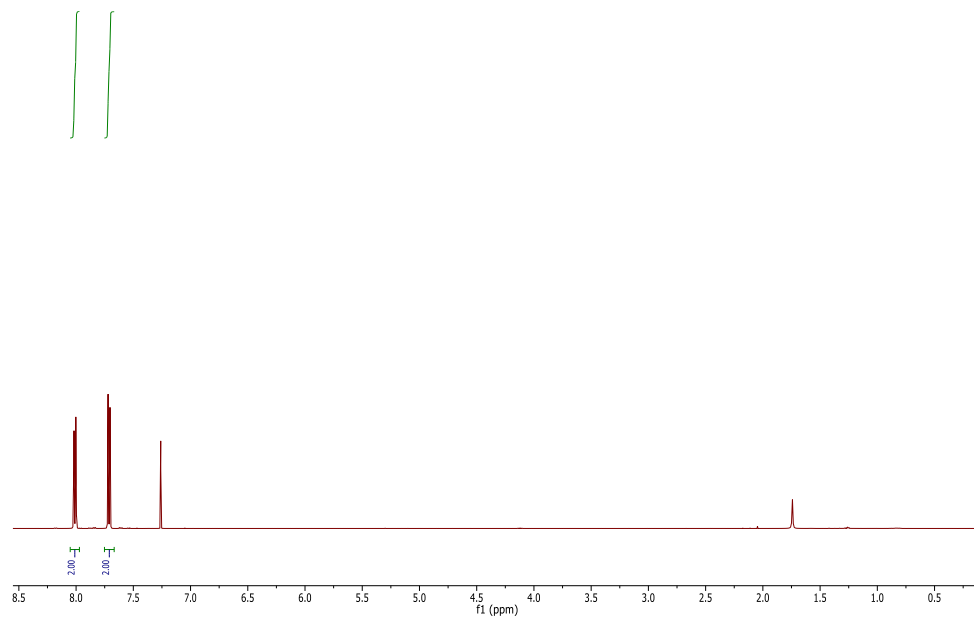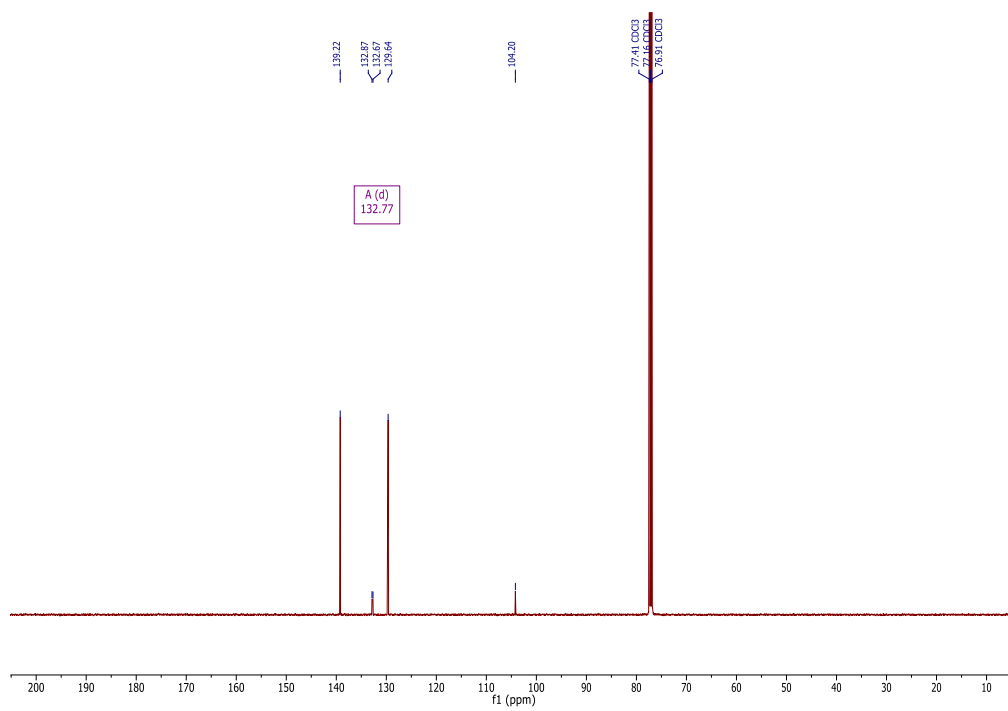

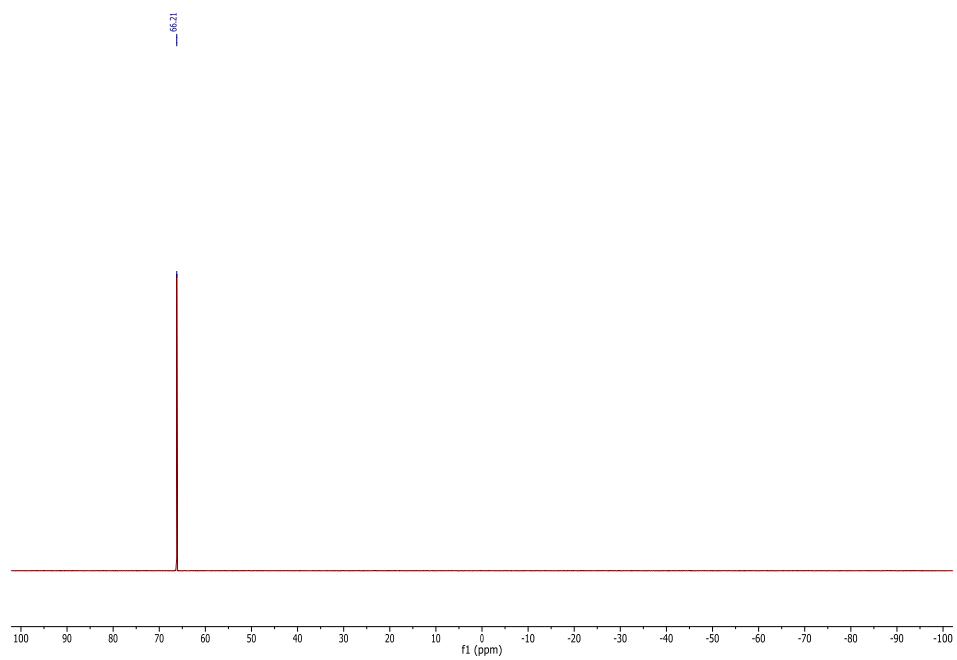

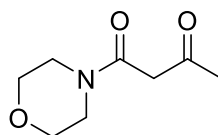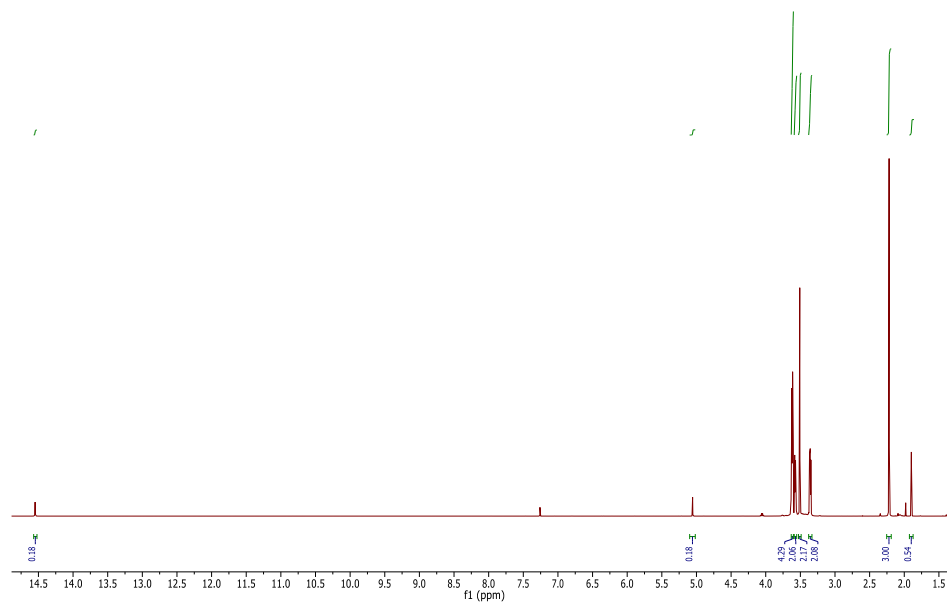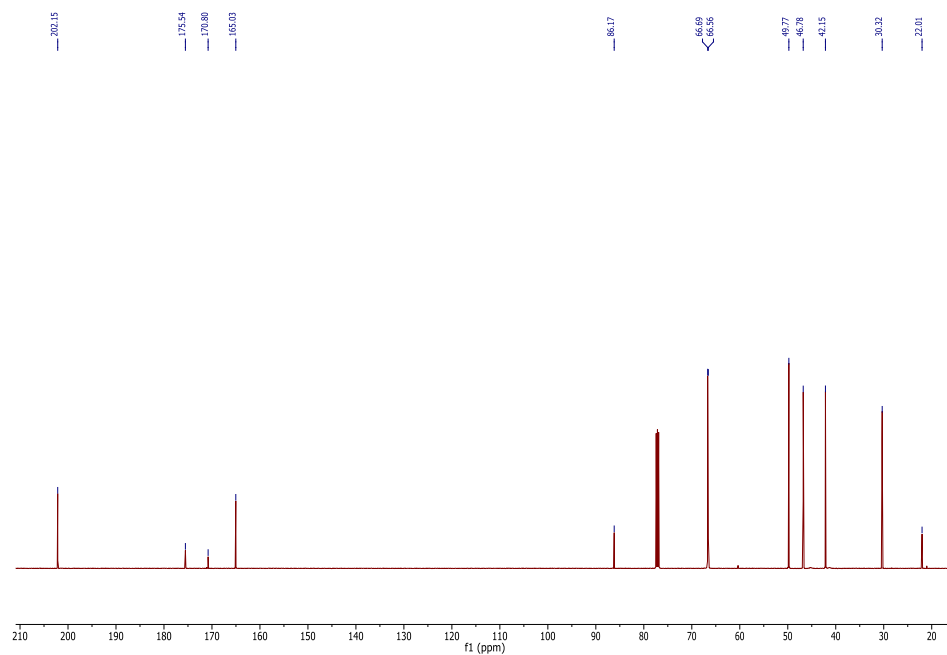

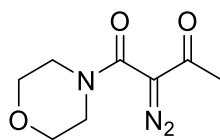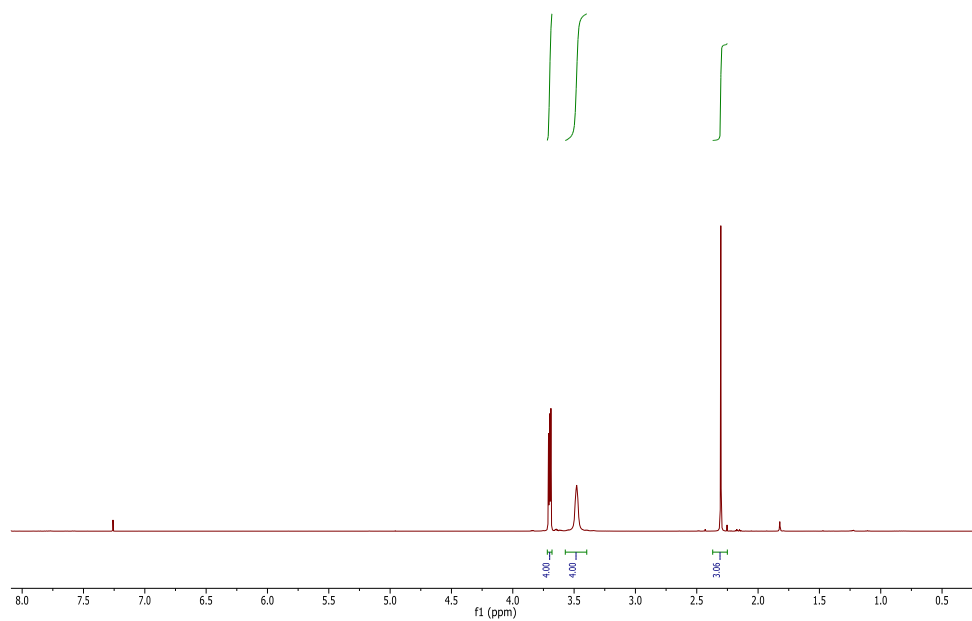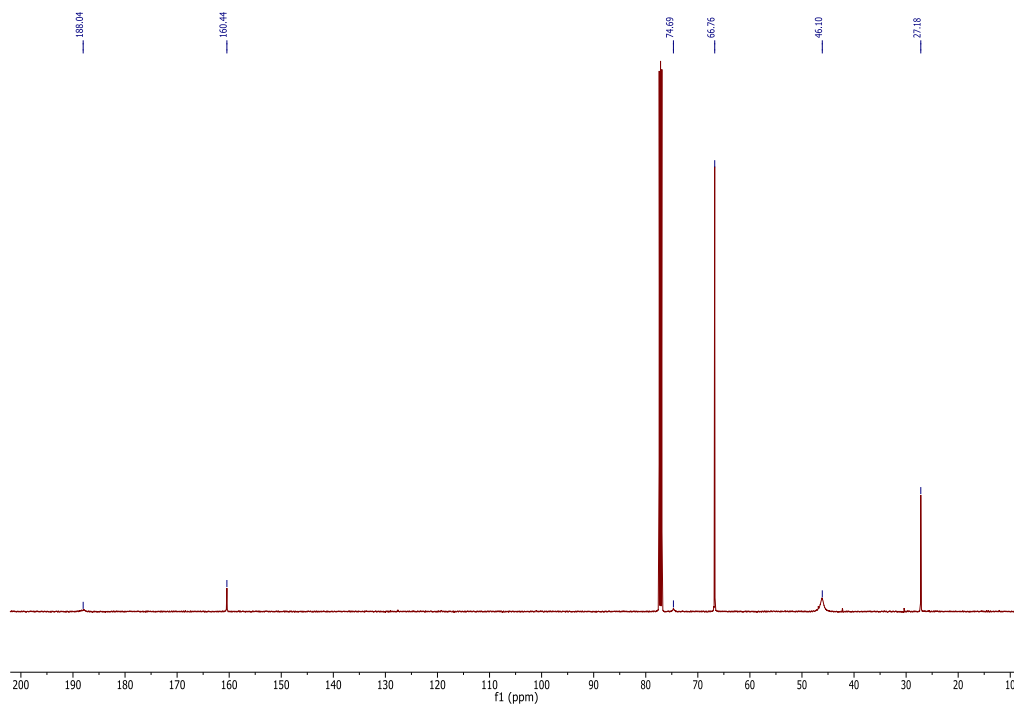

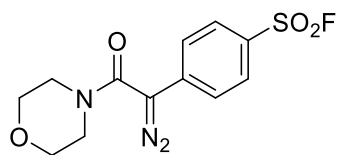

D1

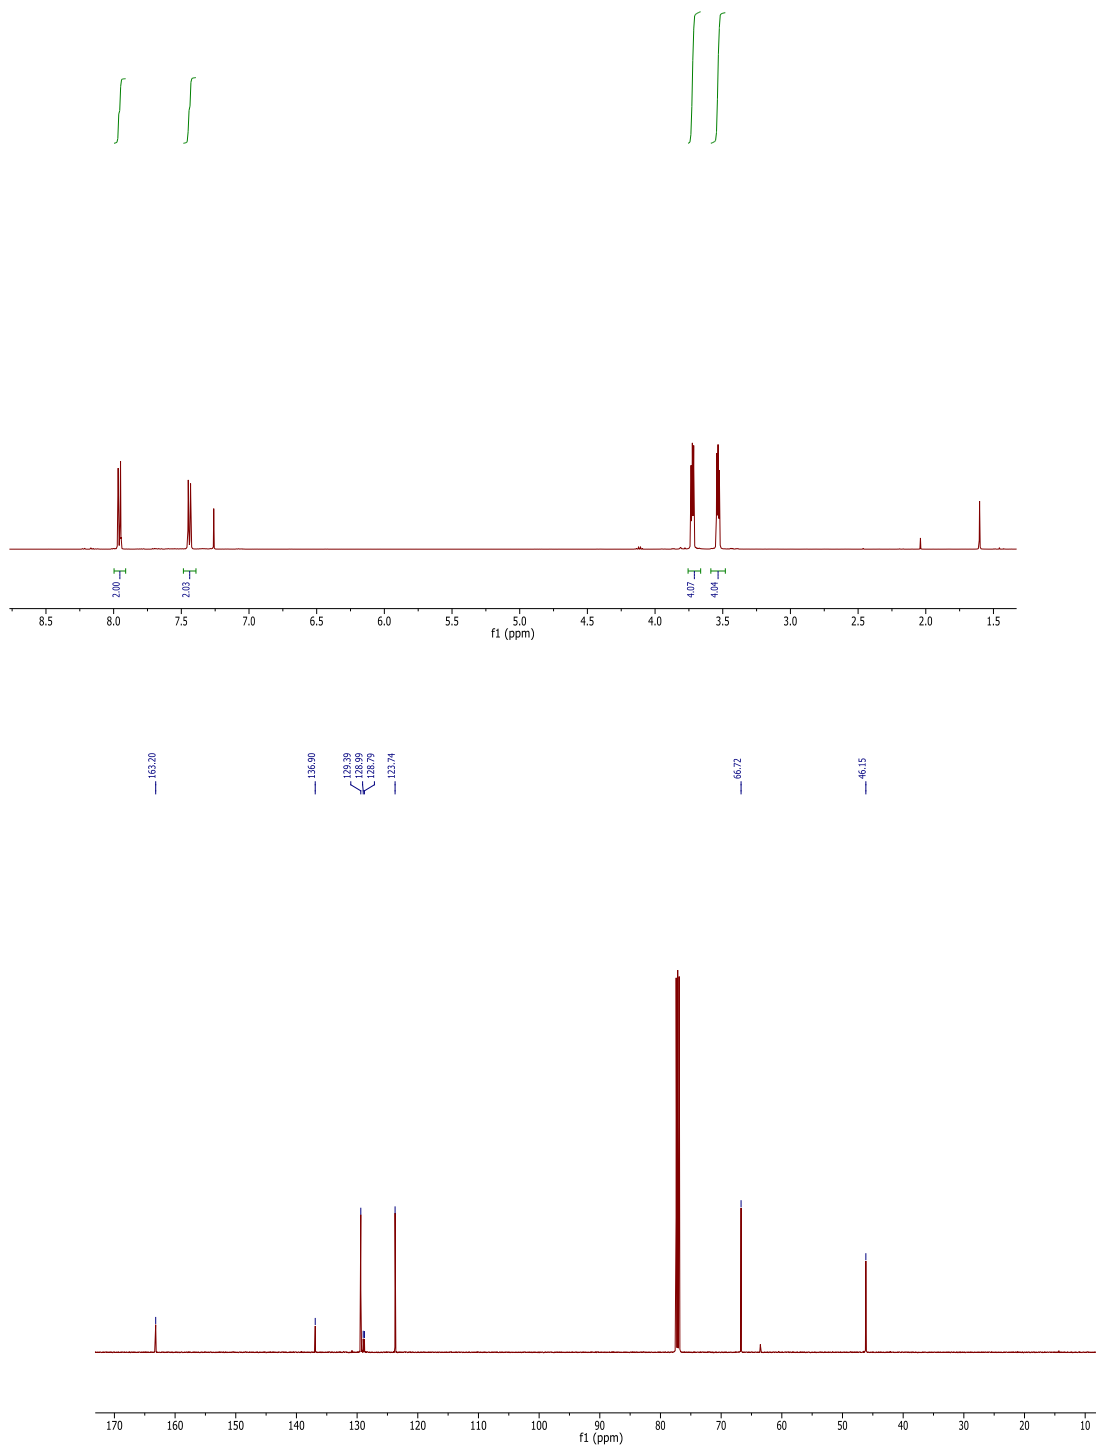



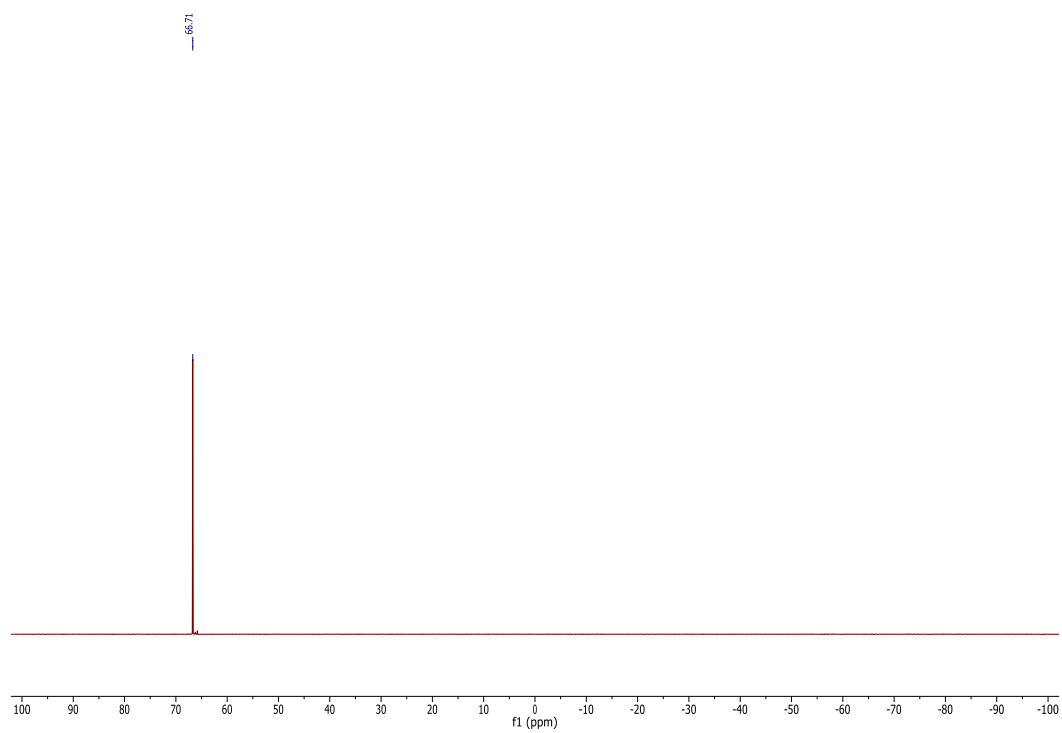

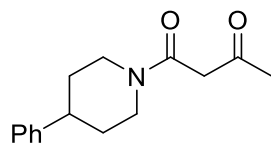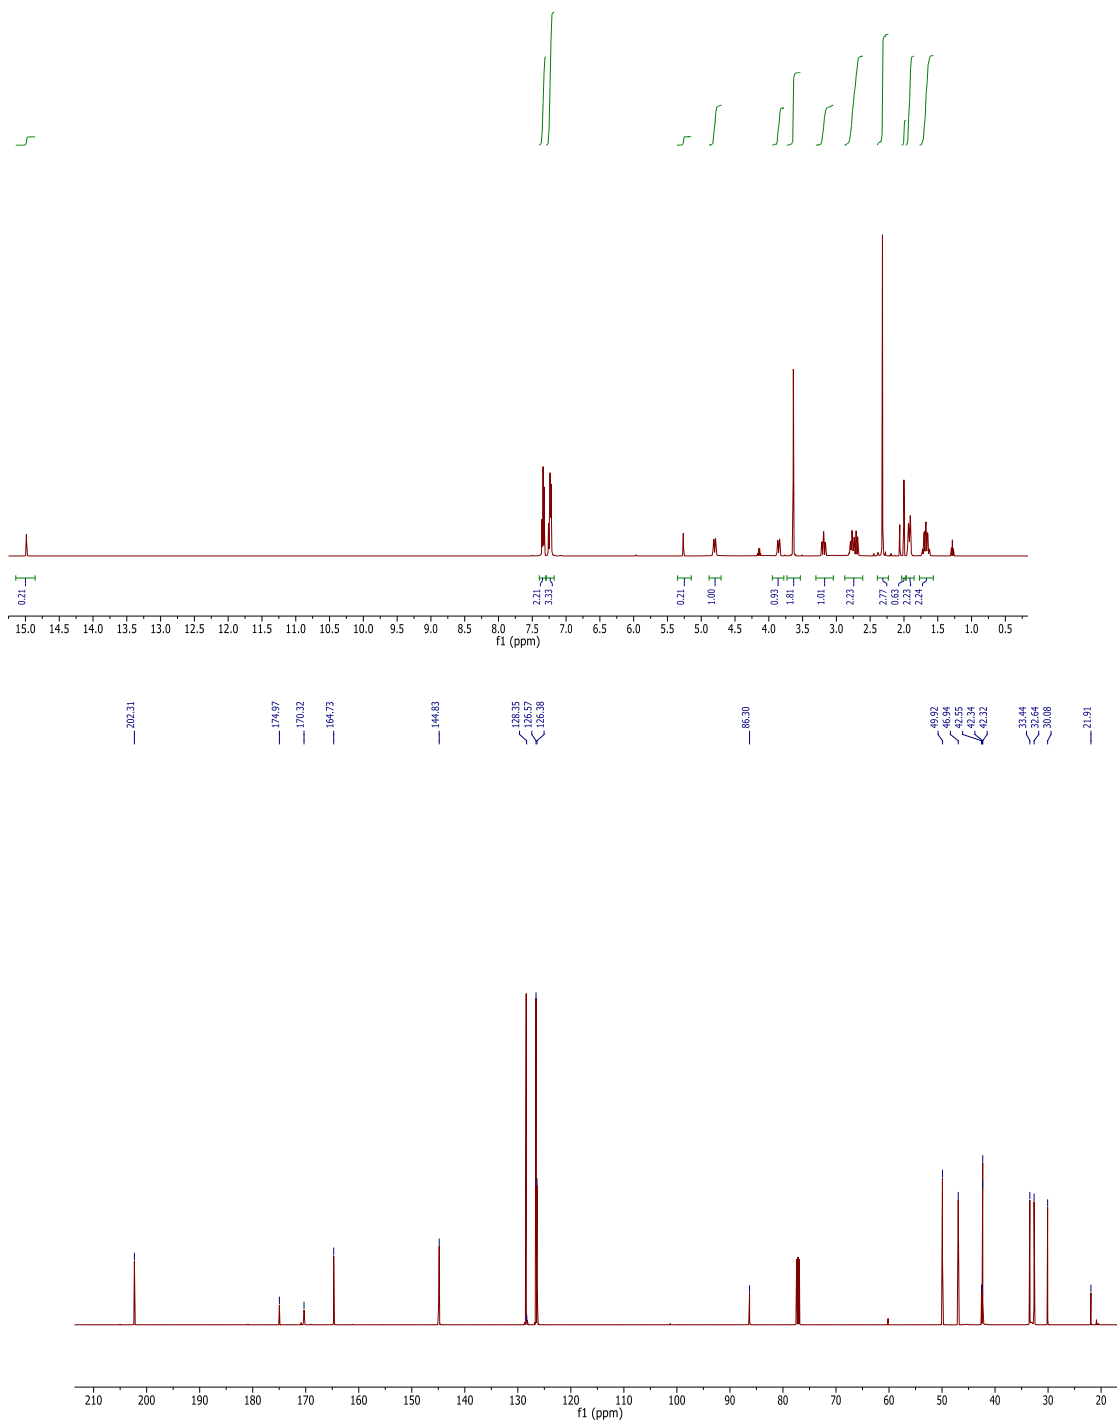

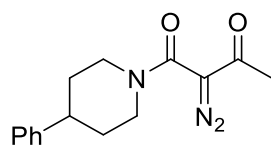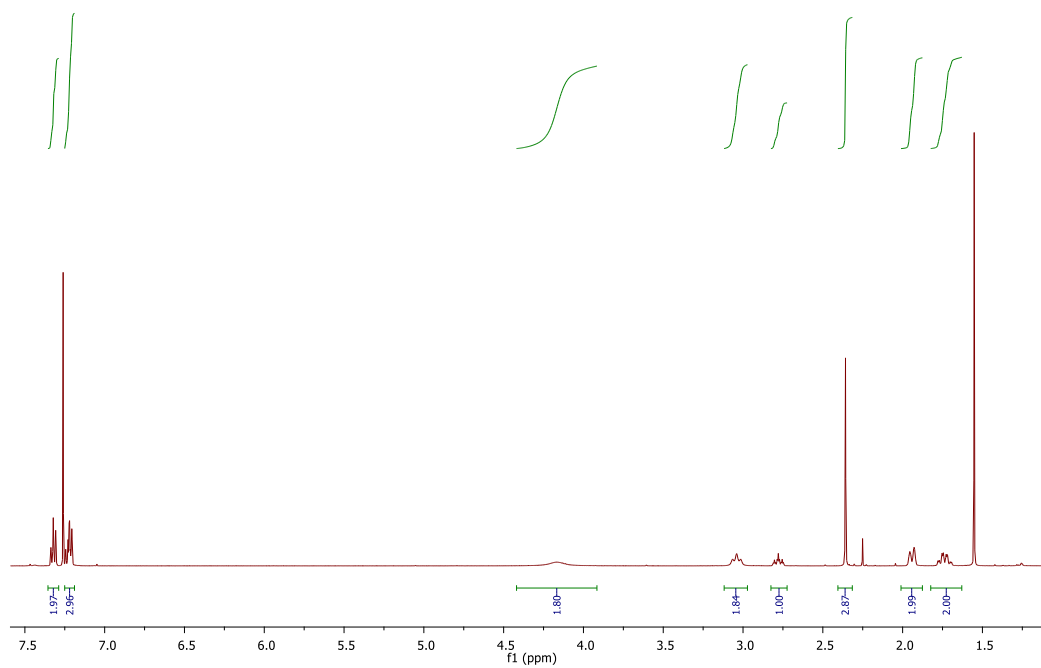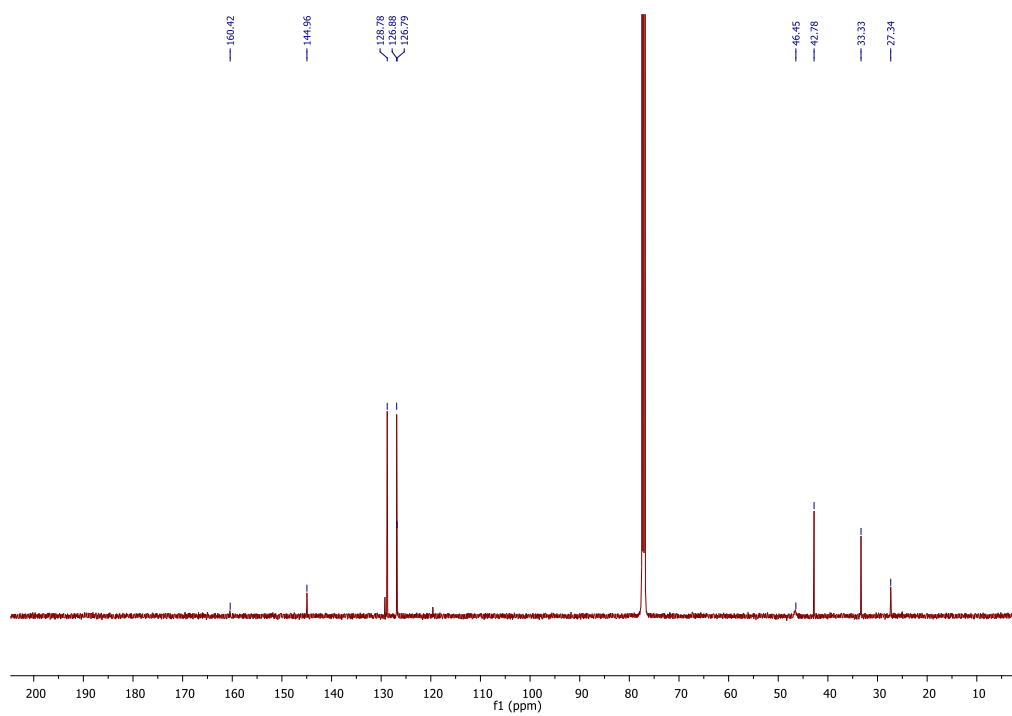

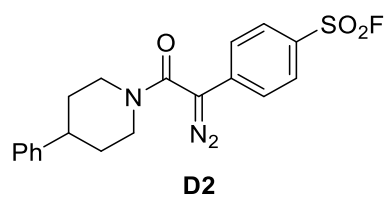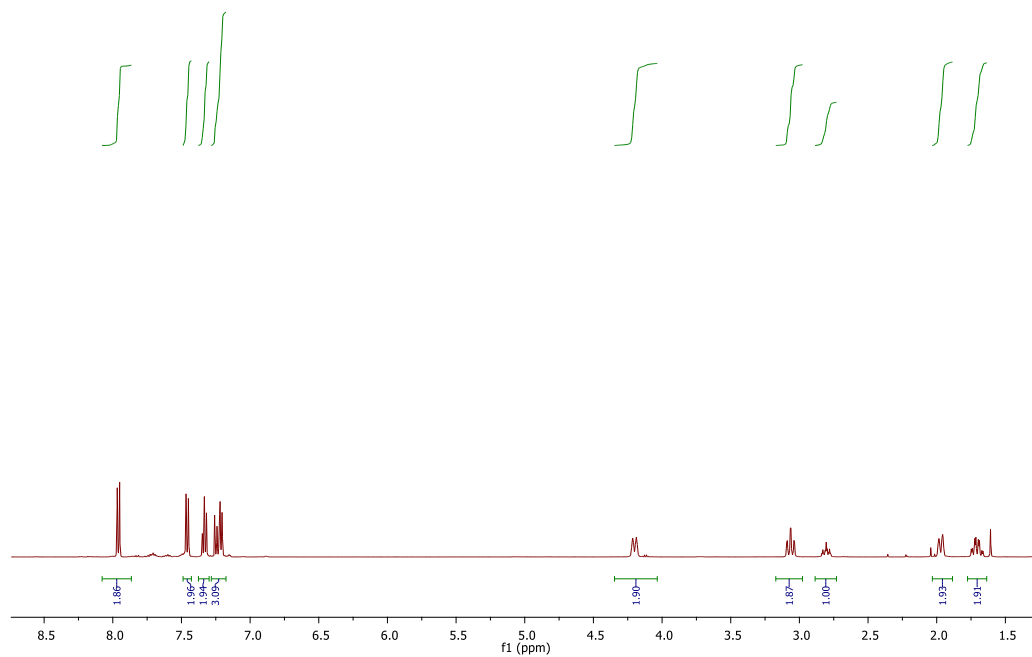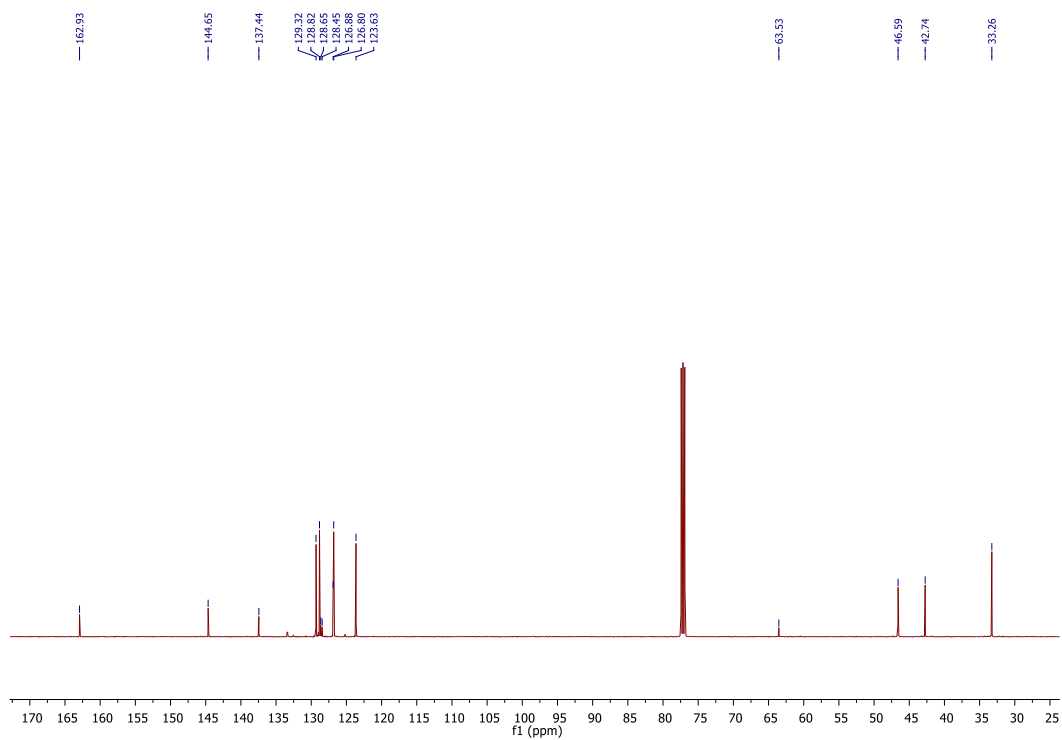

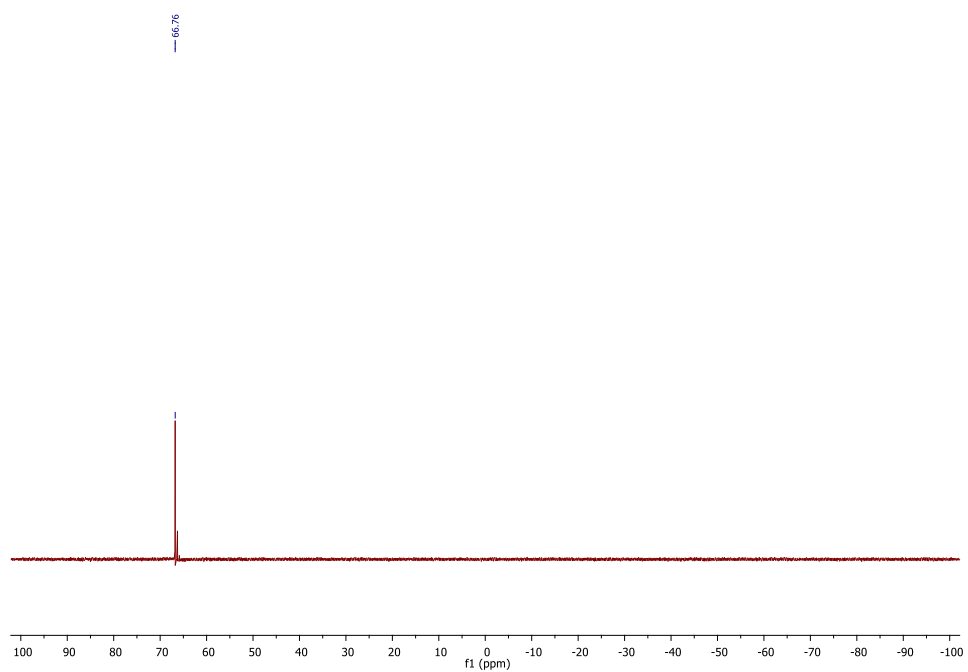

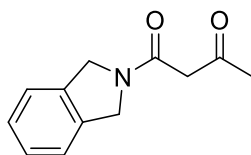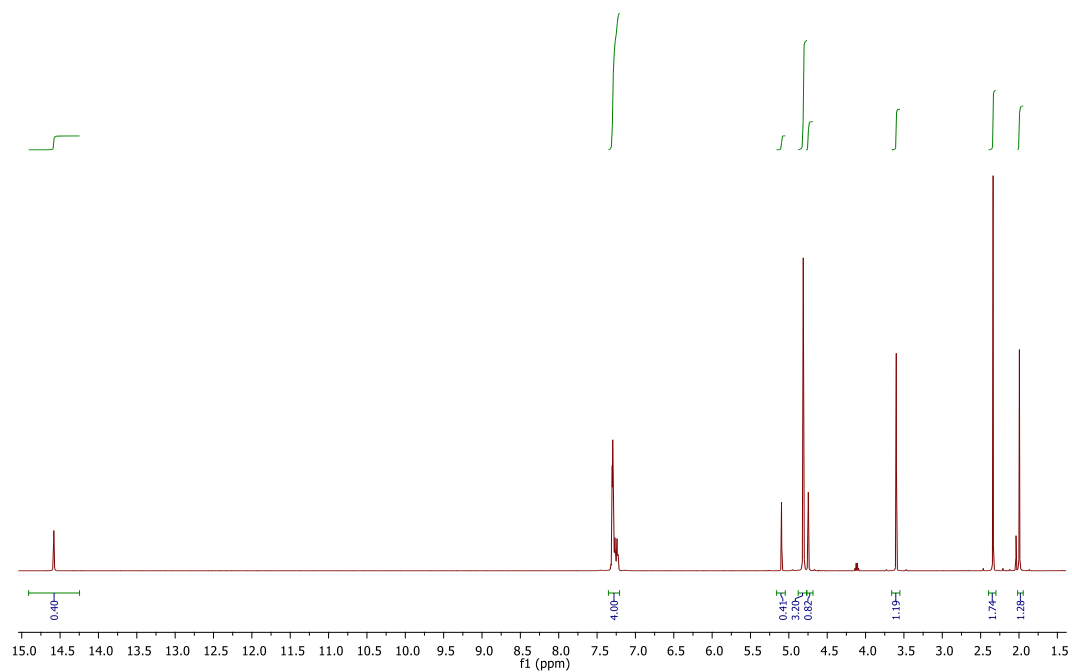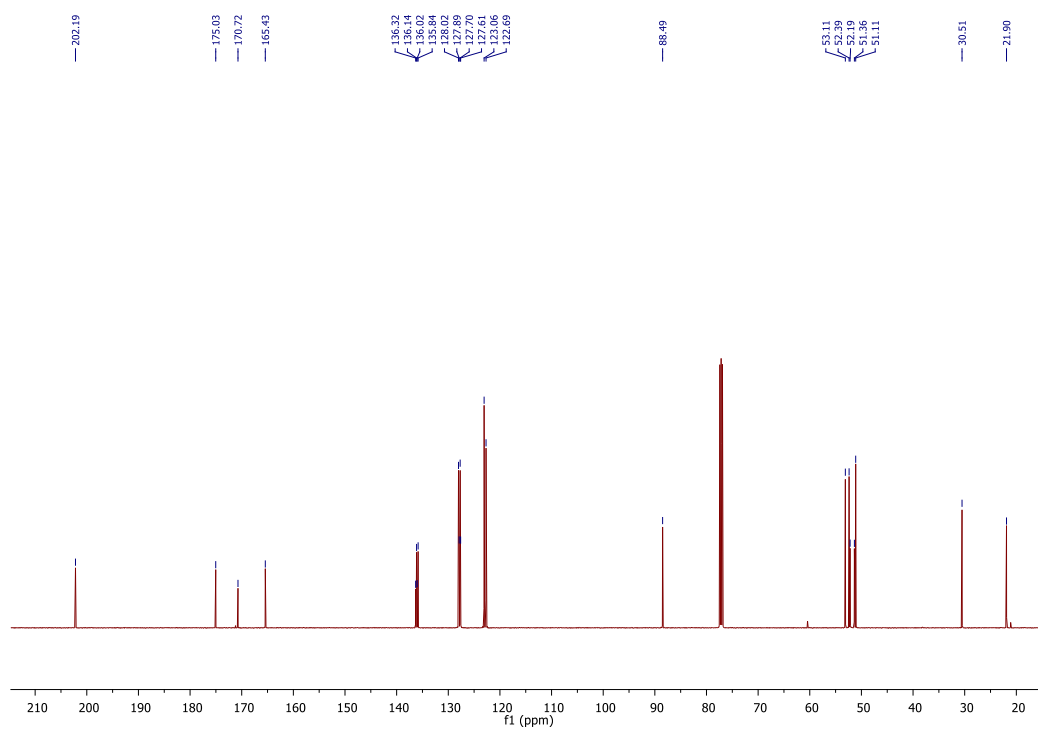

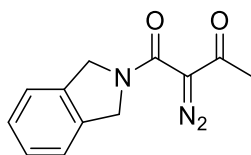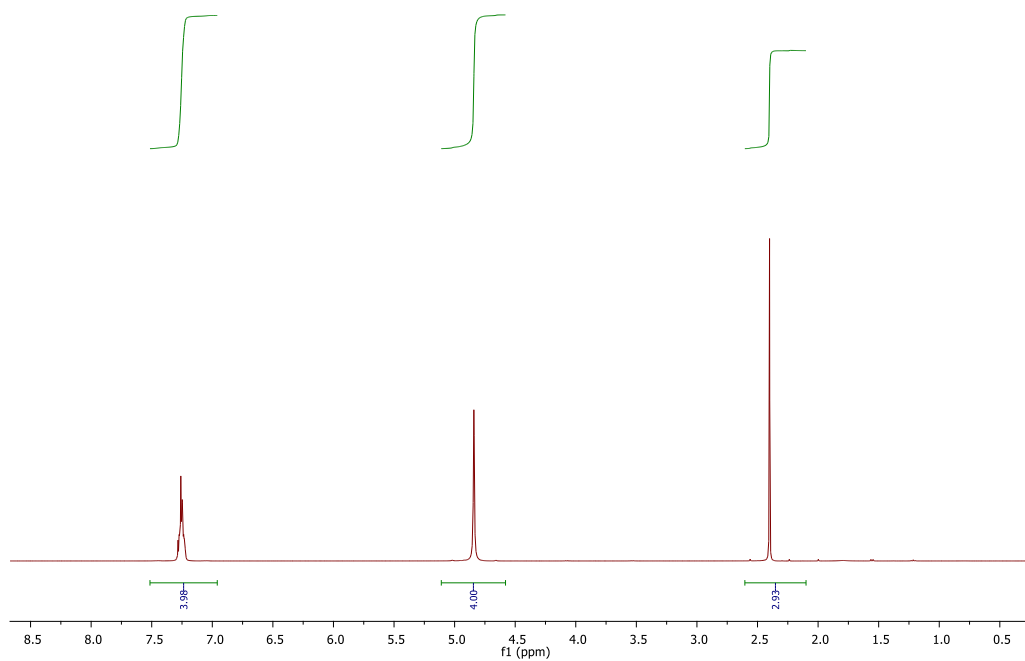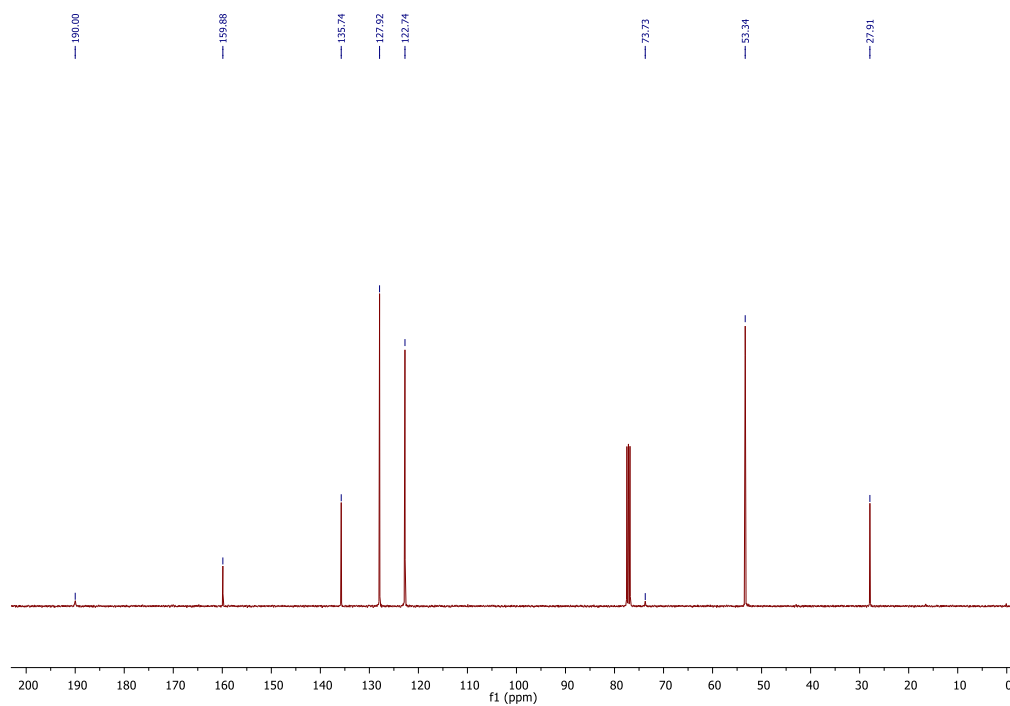

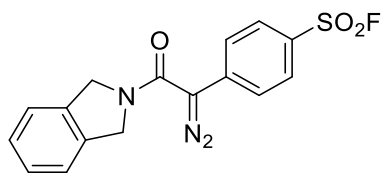

**D3**

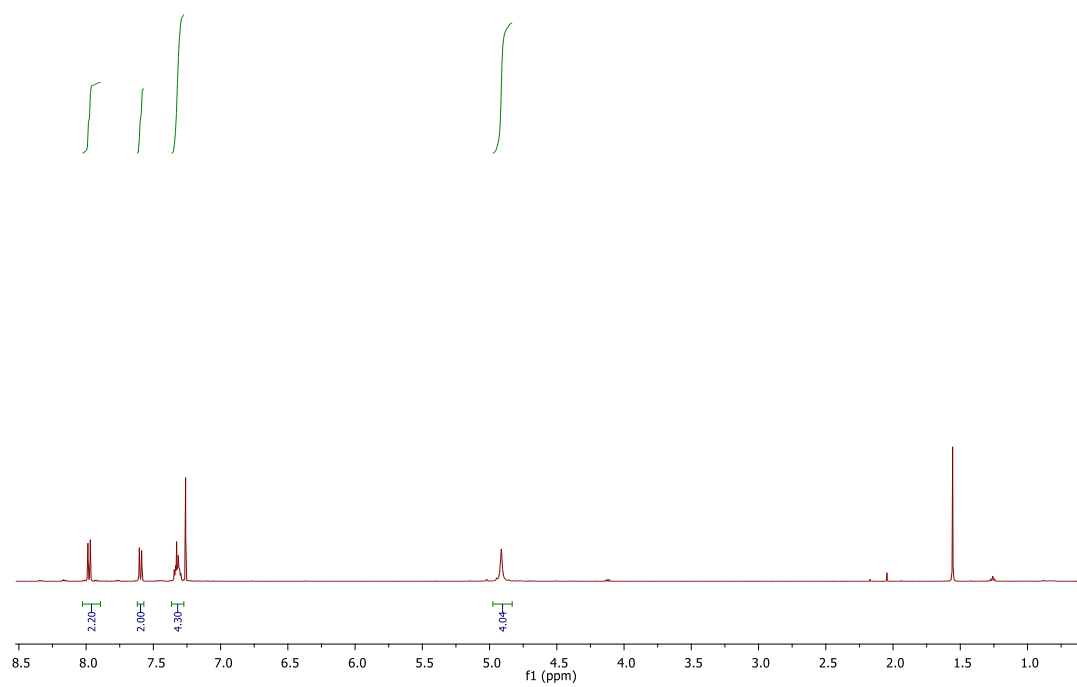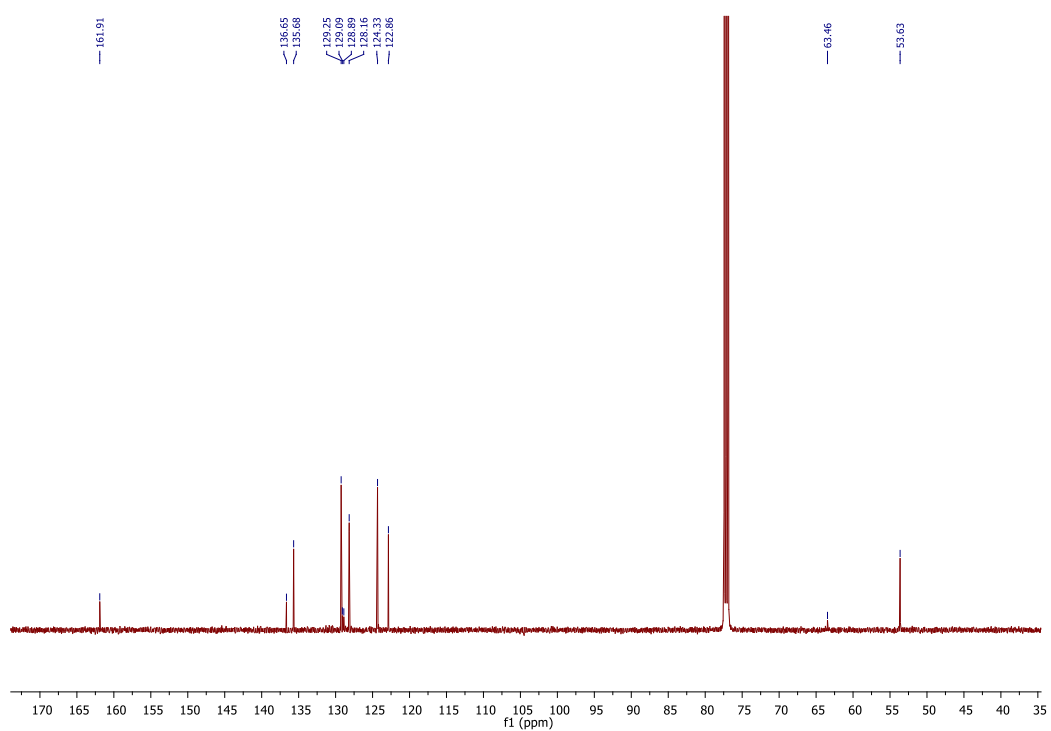



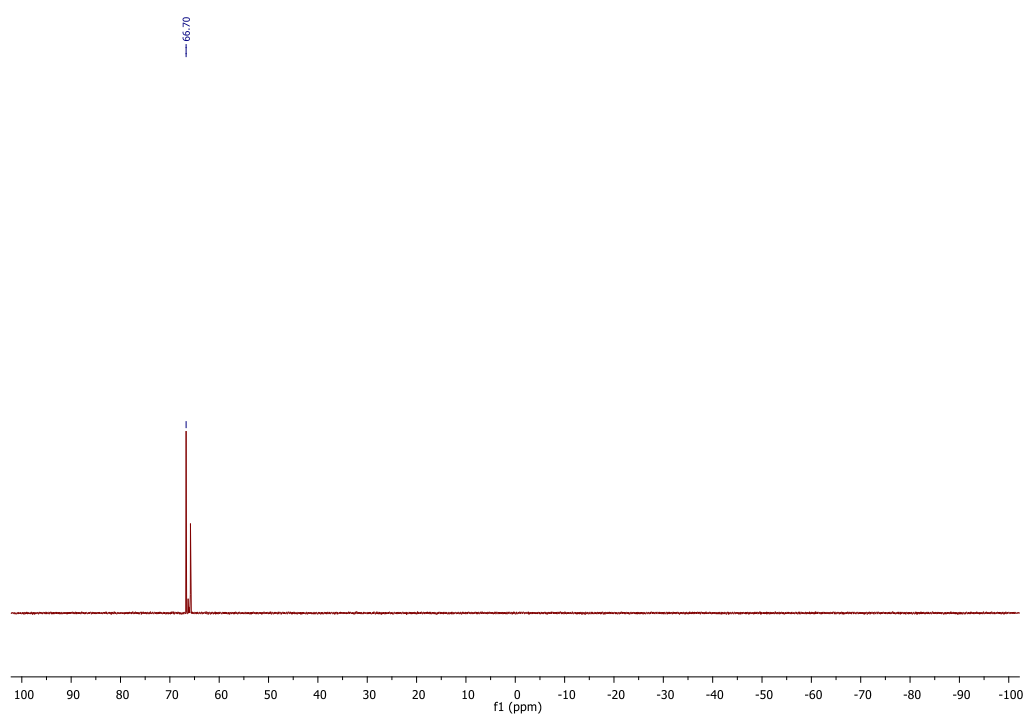

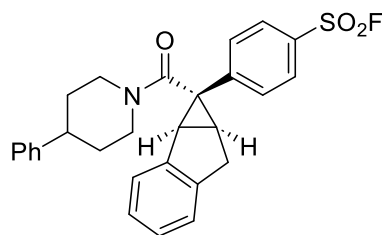

**2-7**

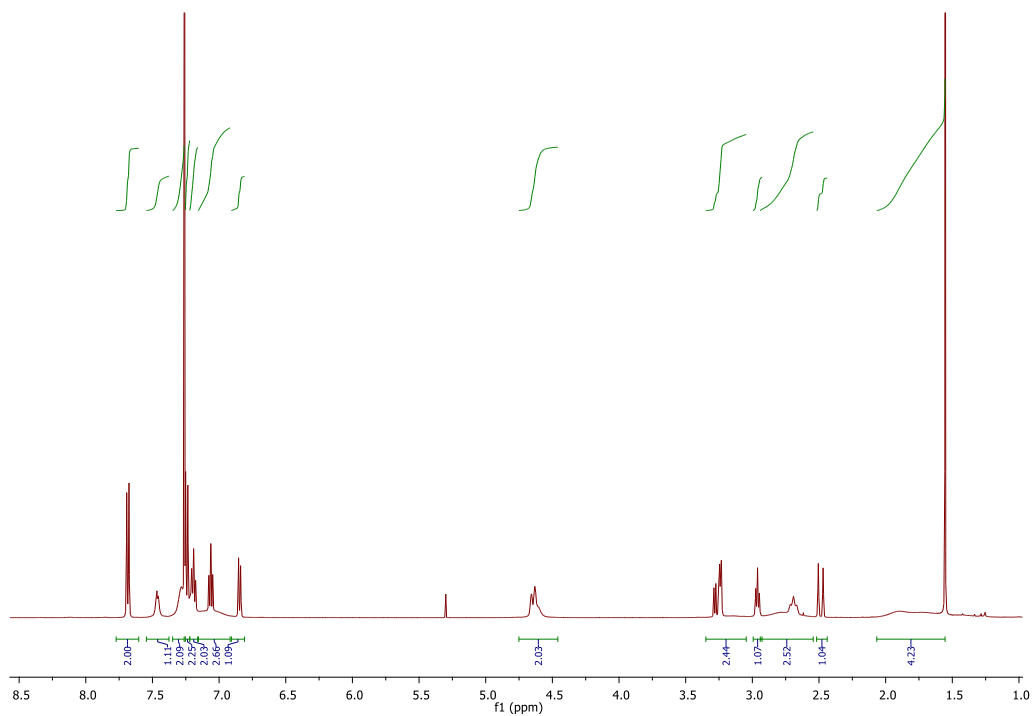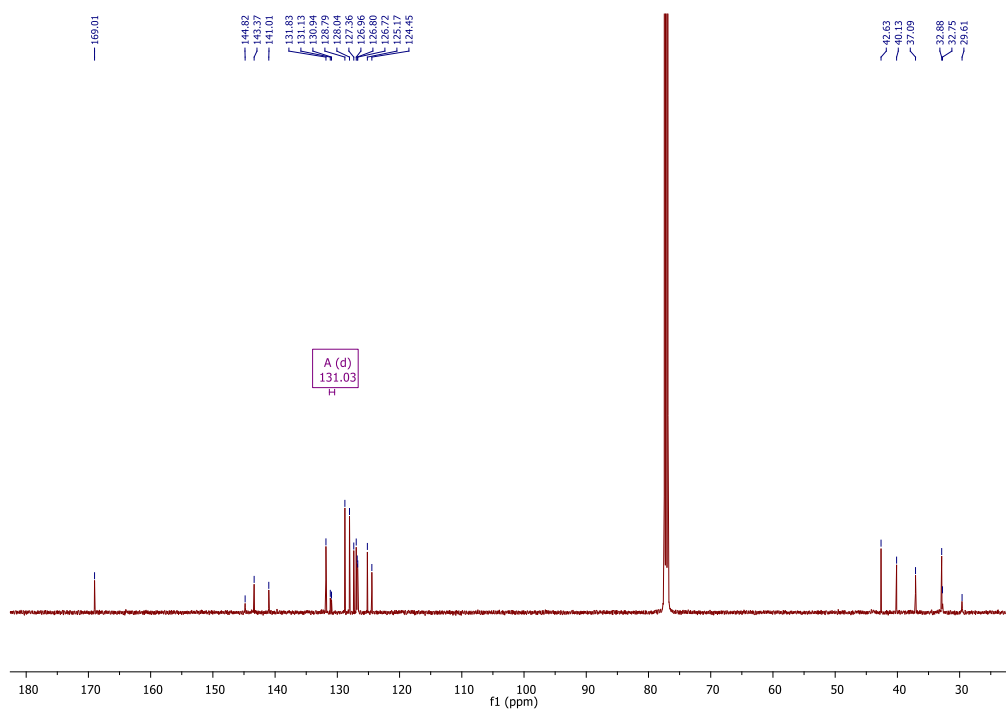

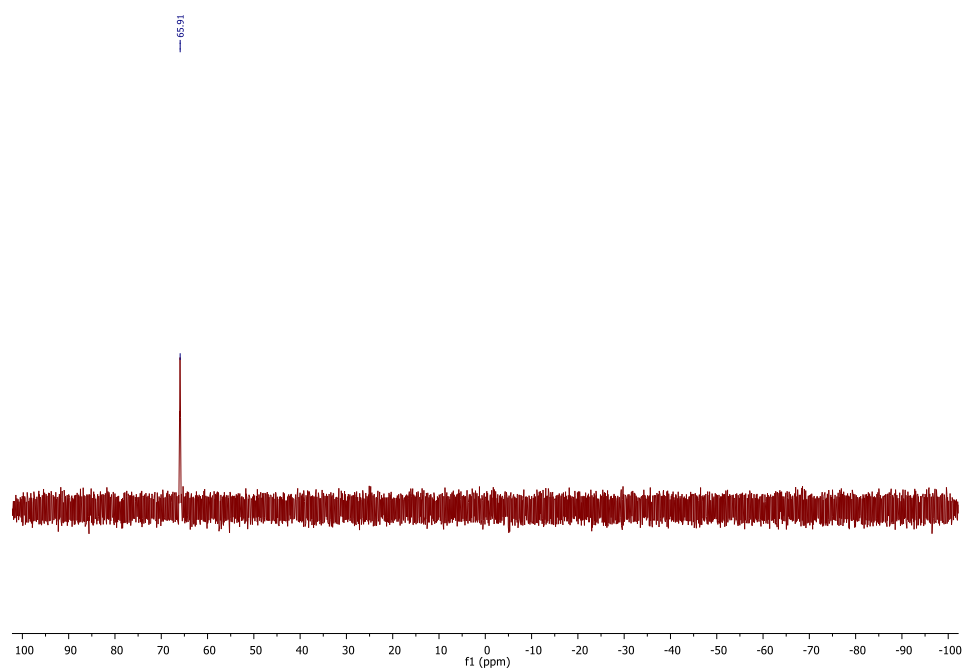

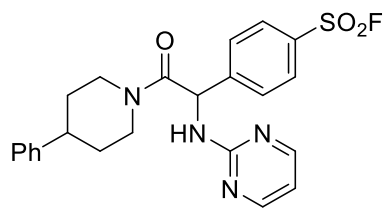

**2-13**

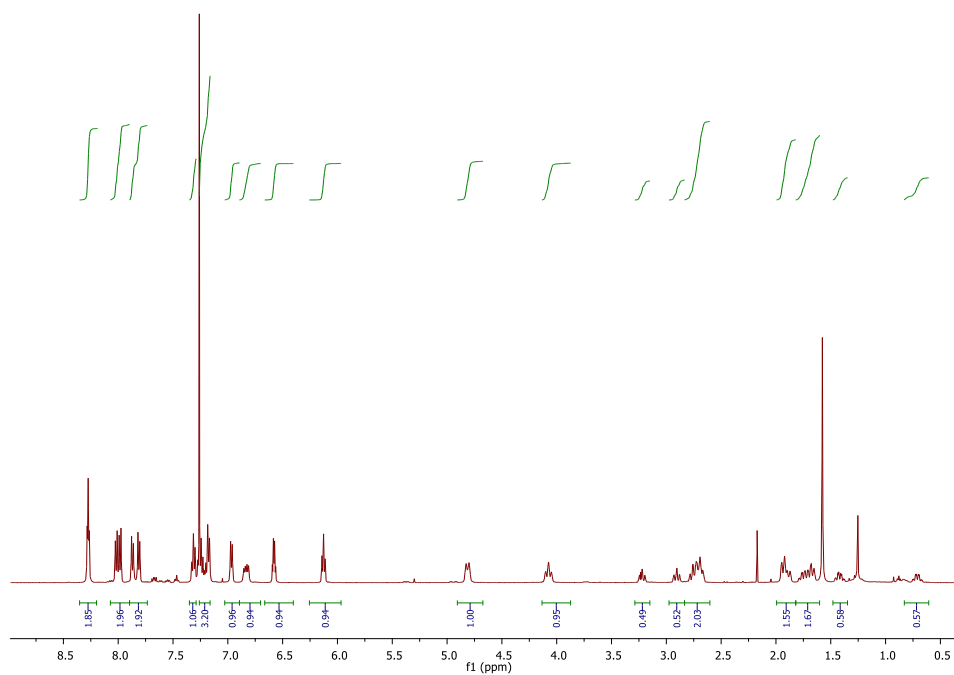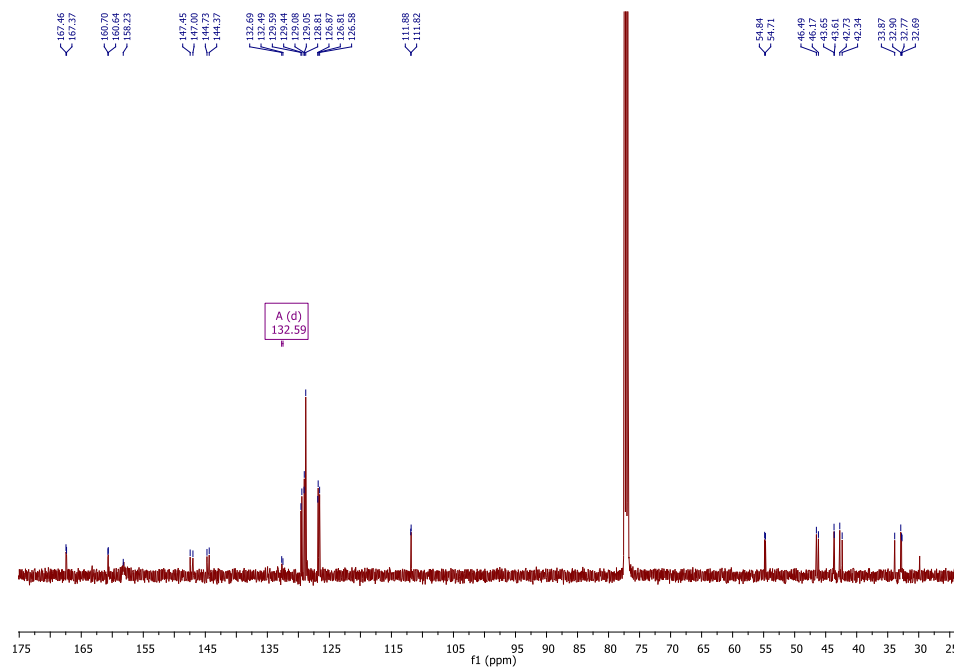

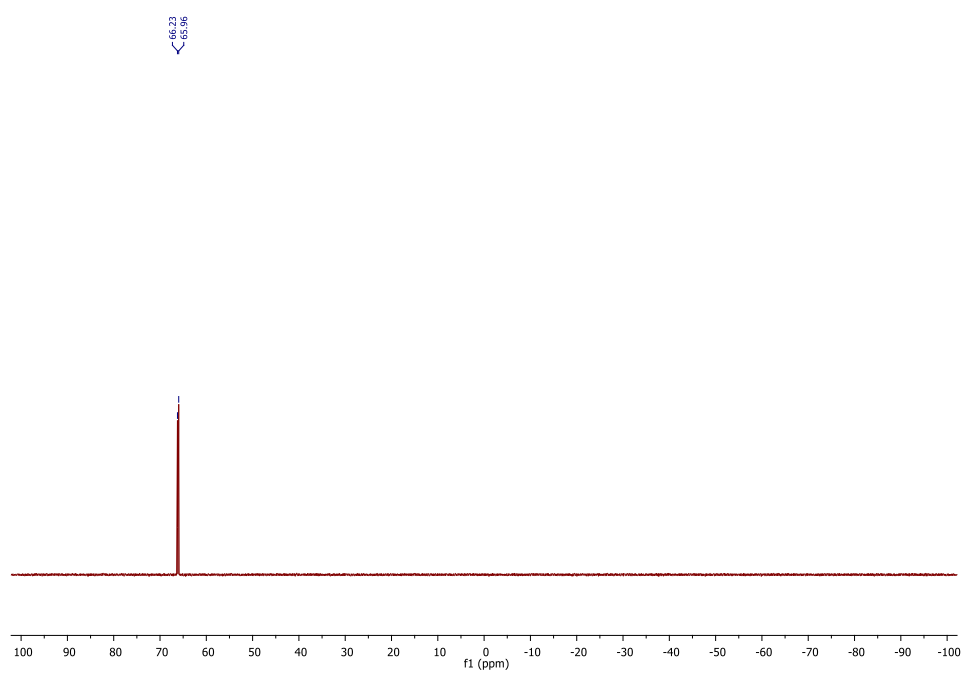

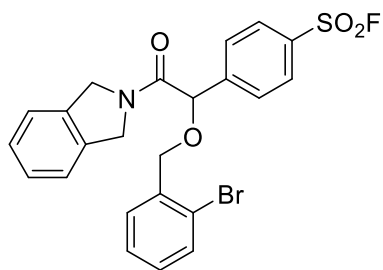

**3-2**

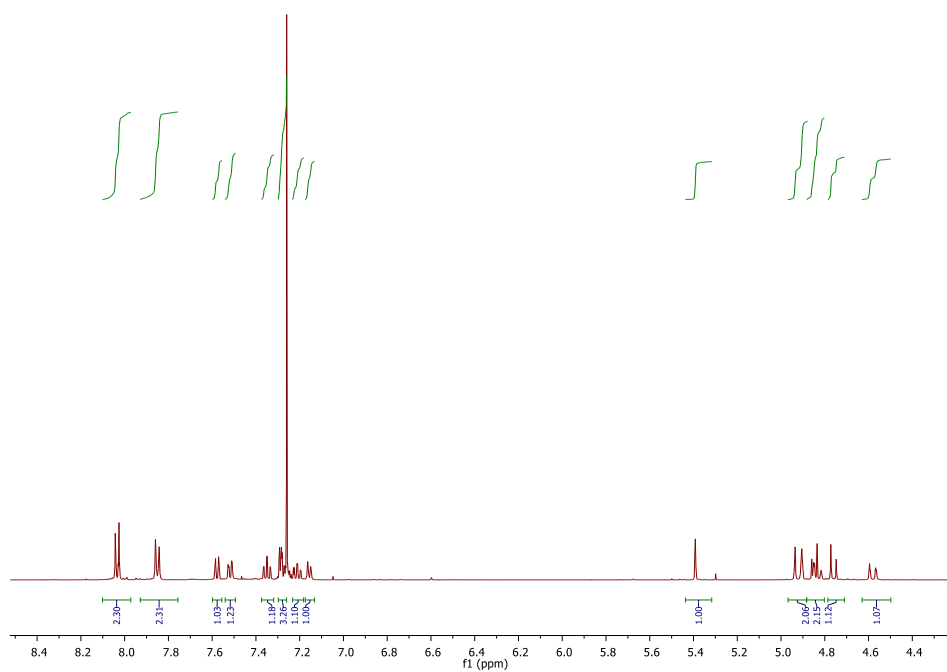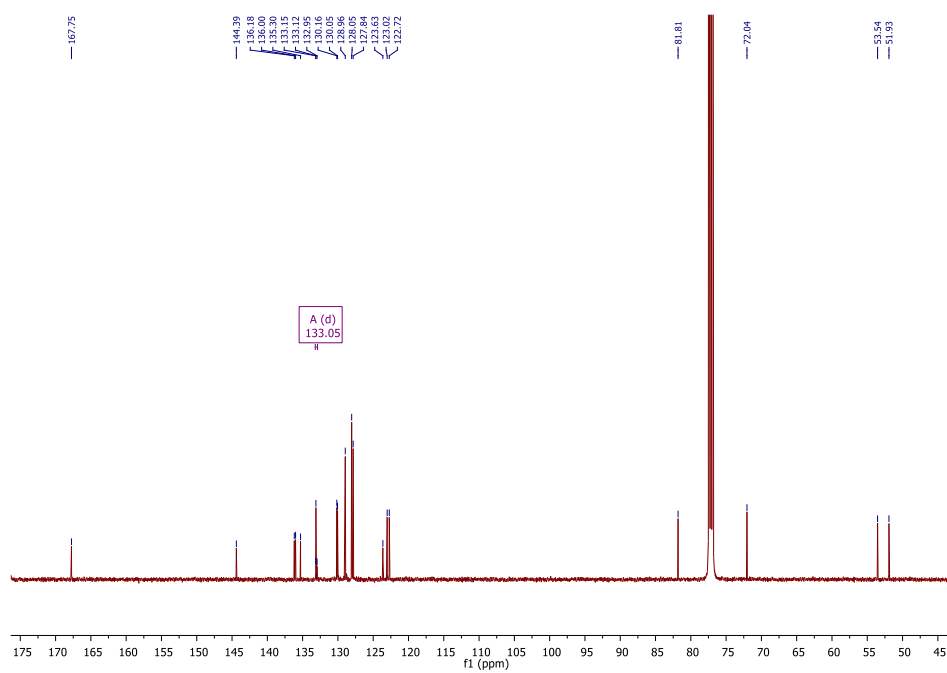

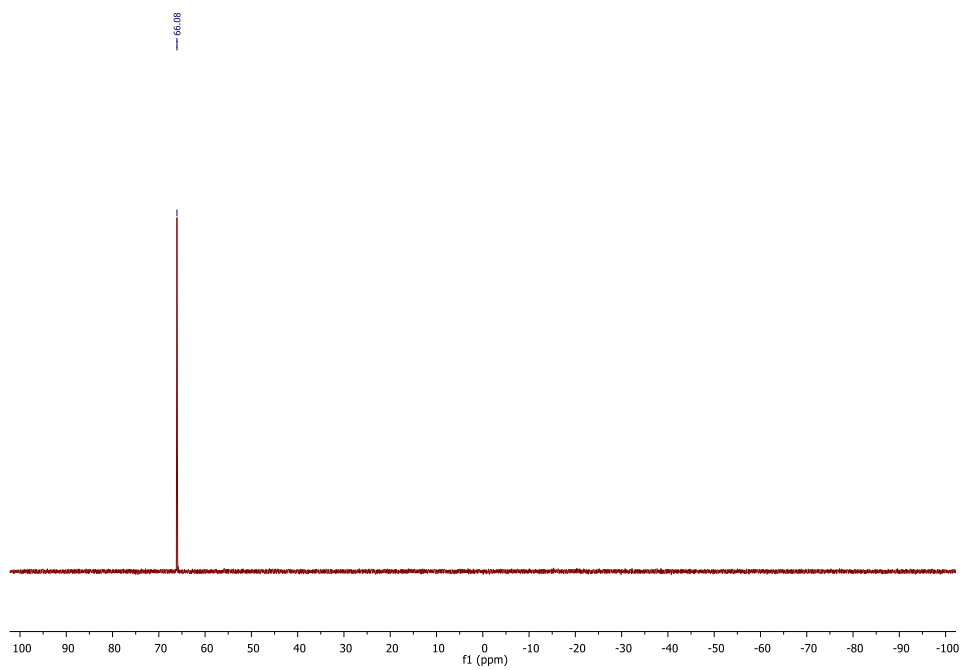

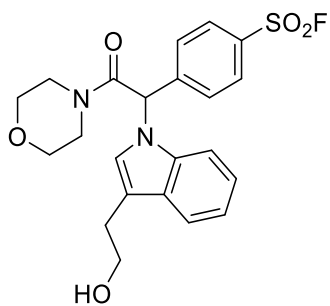

**1-3a**

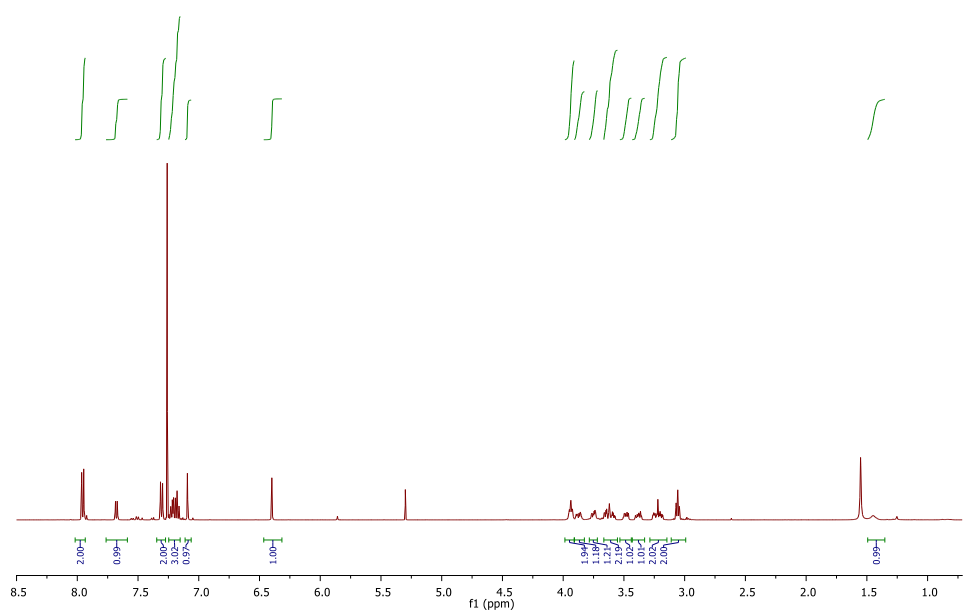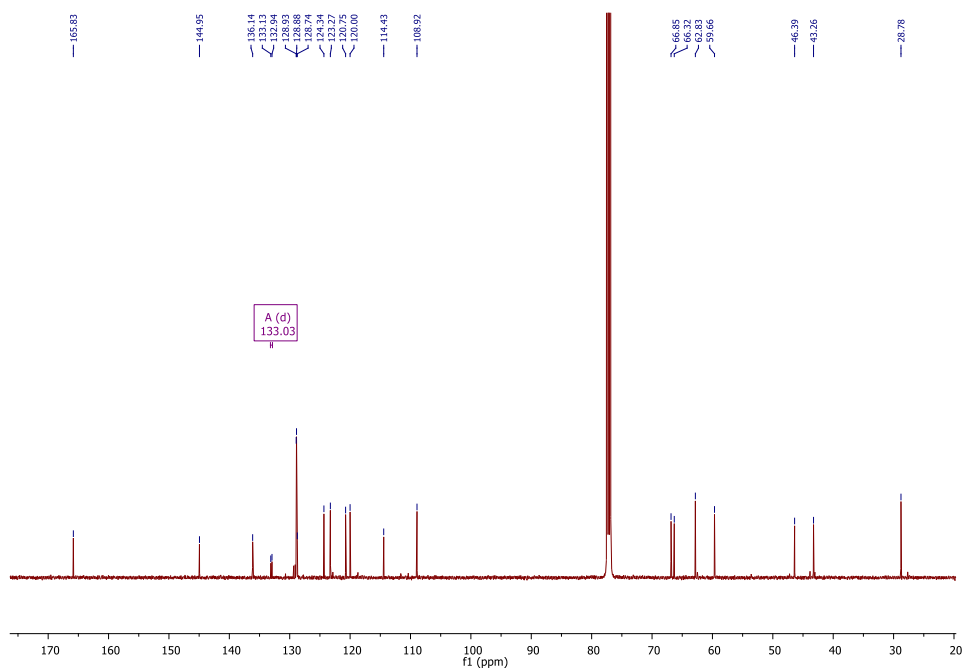



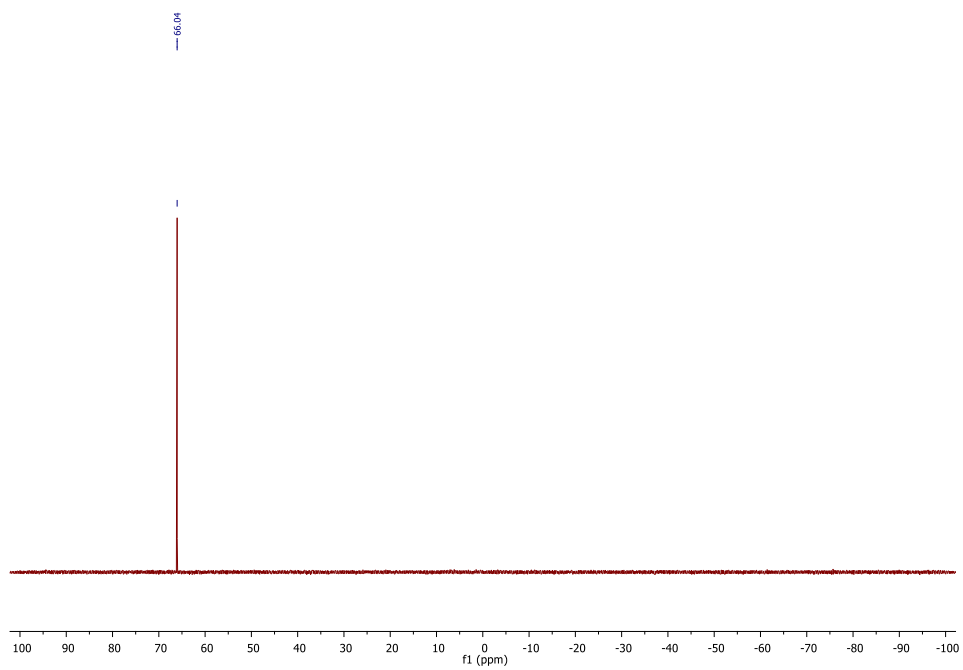

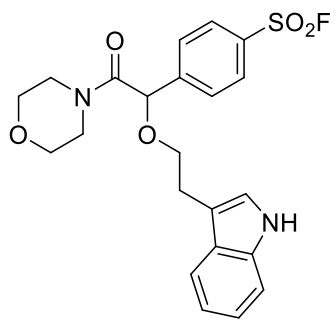

**1-3b**

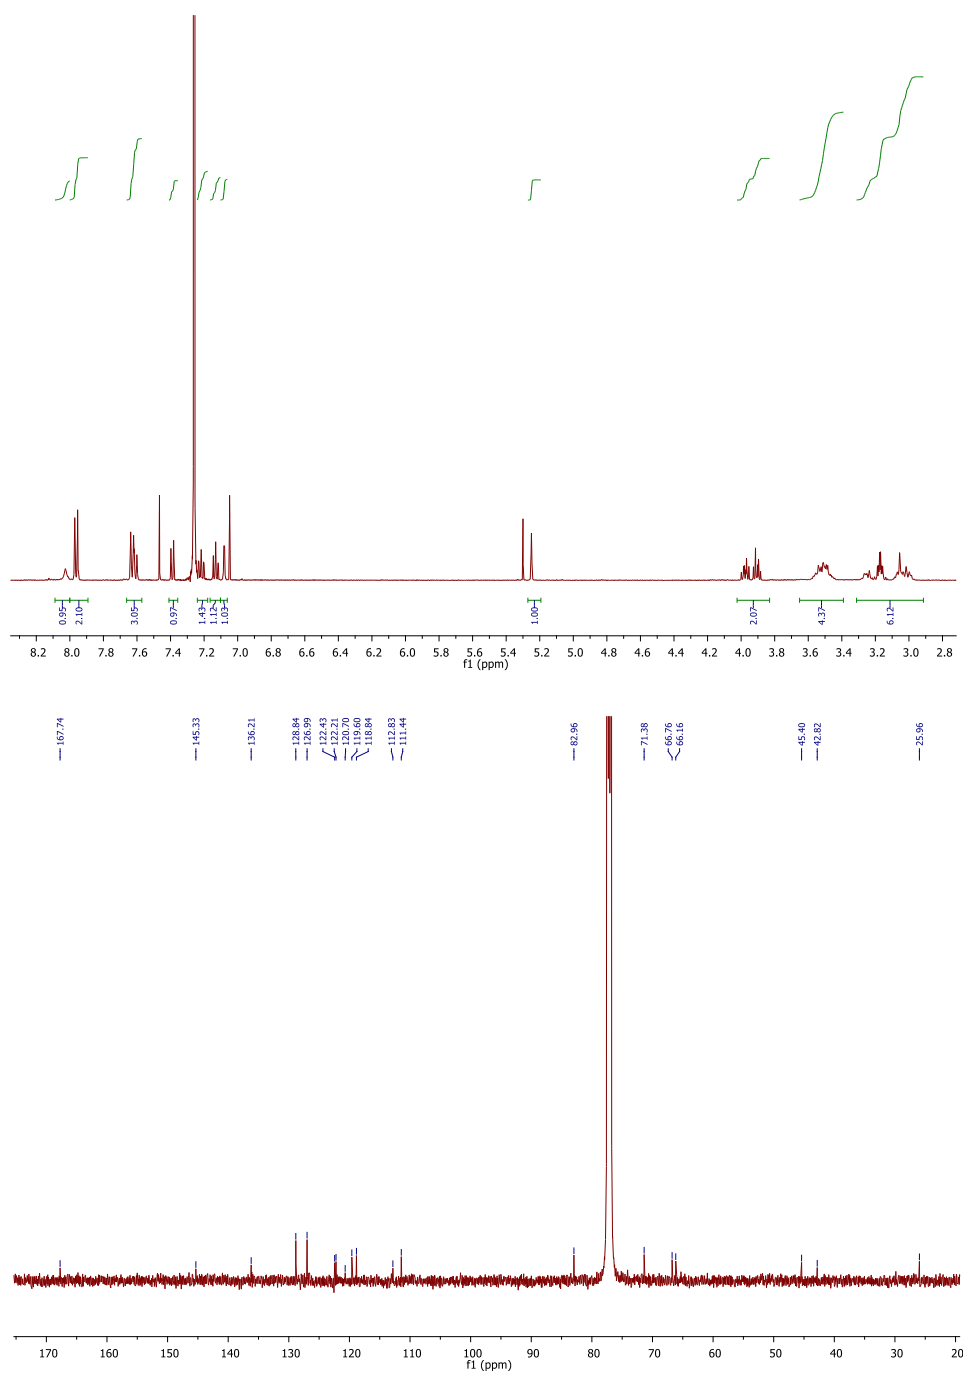

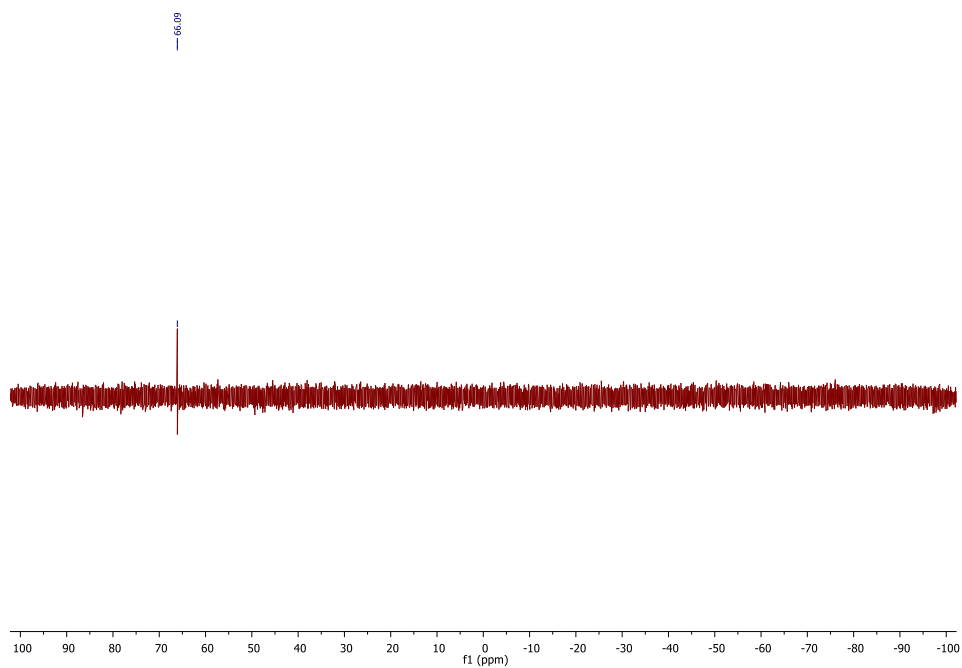

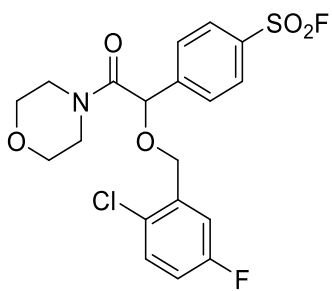

**1-5**

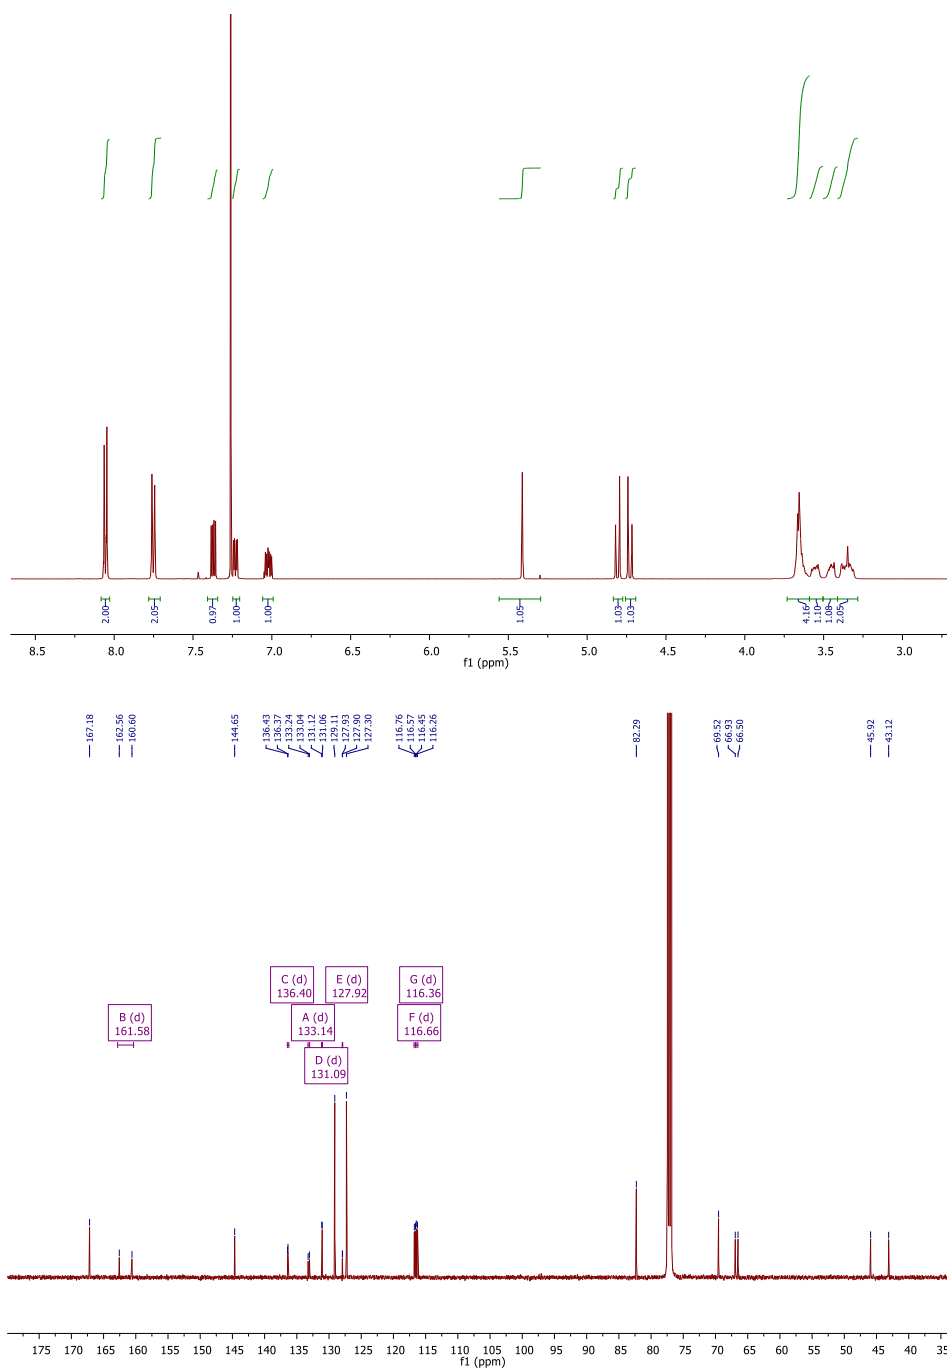

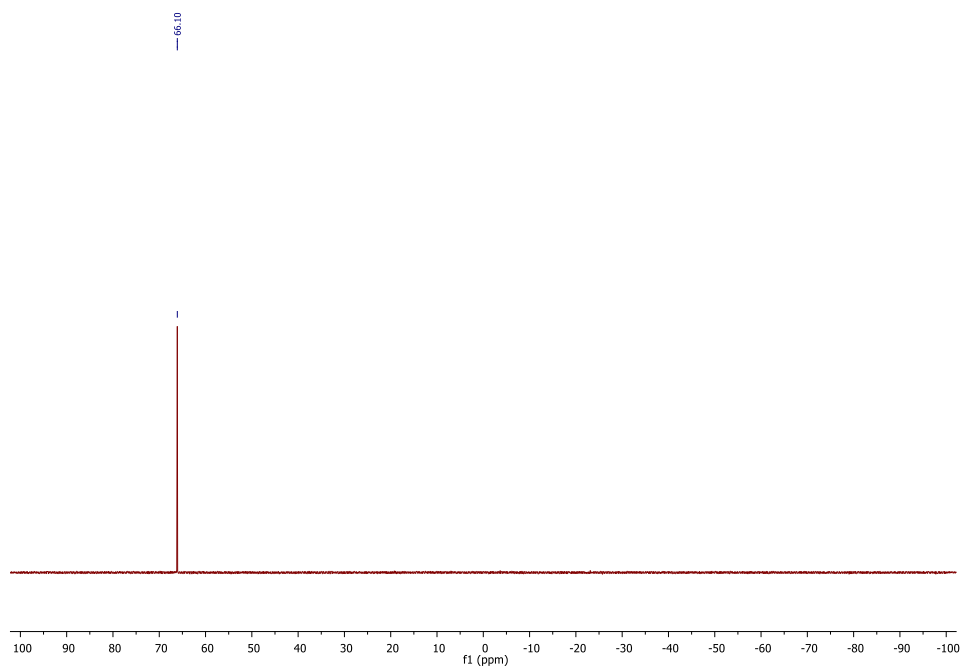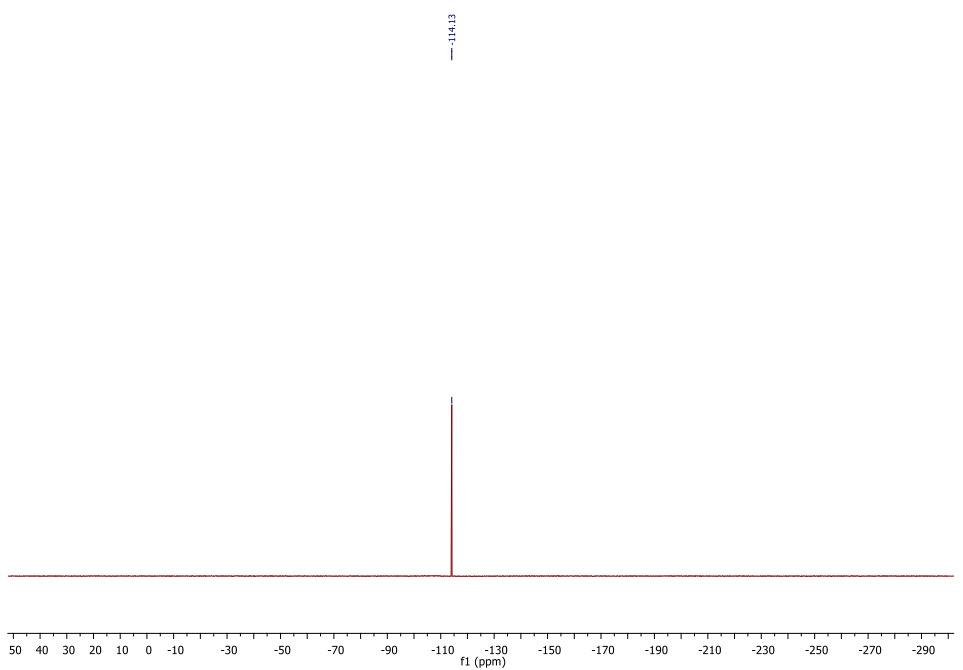

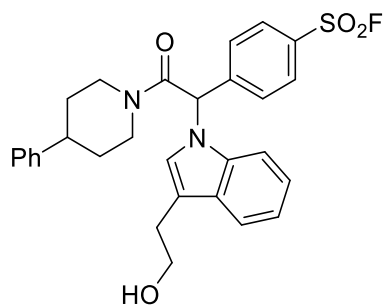

**2-3a**

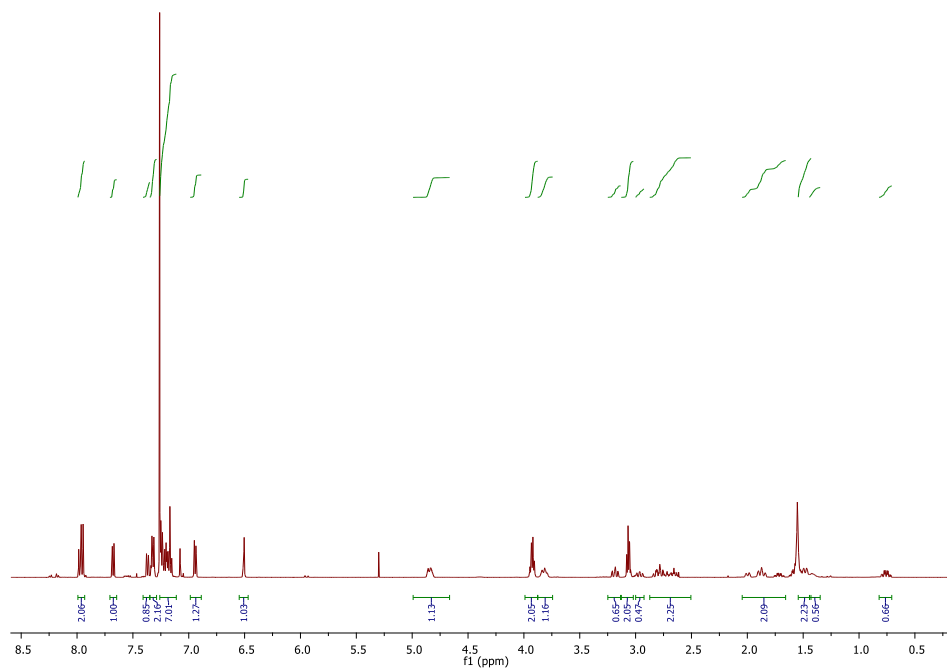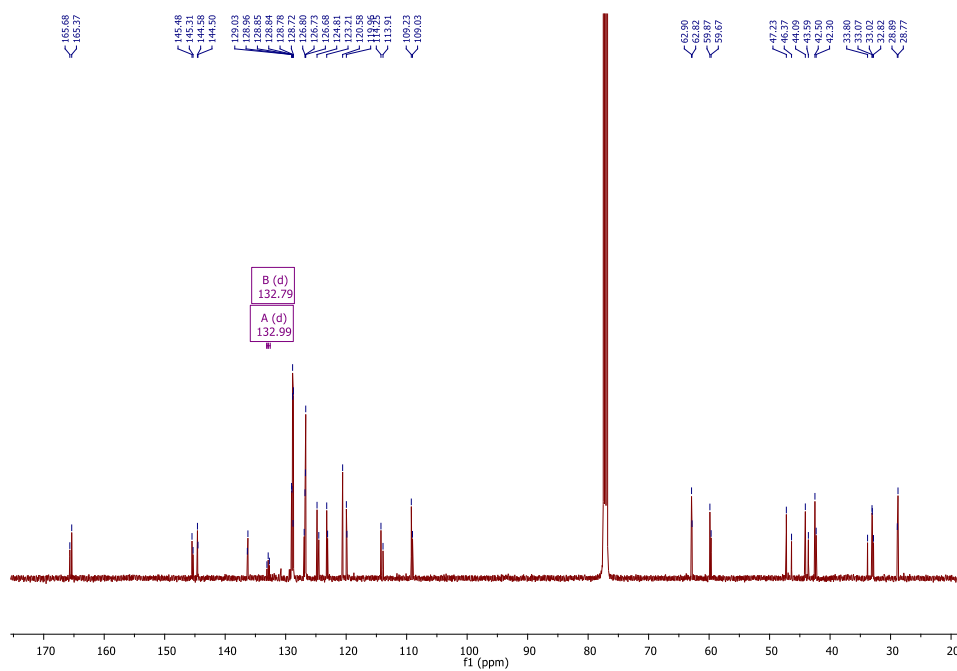

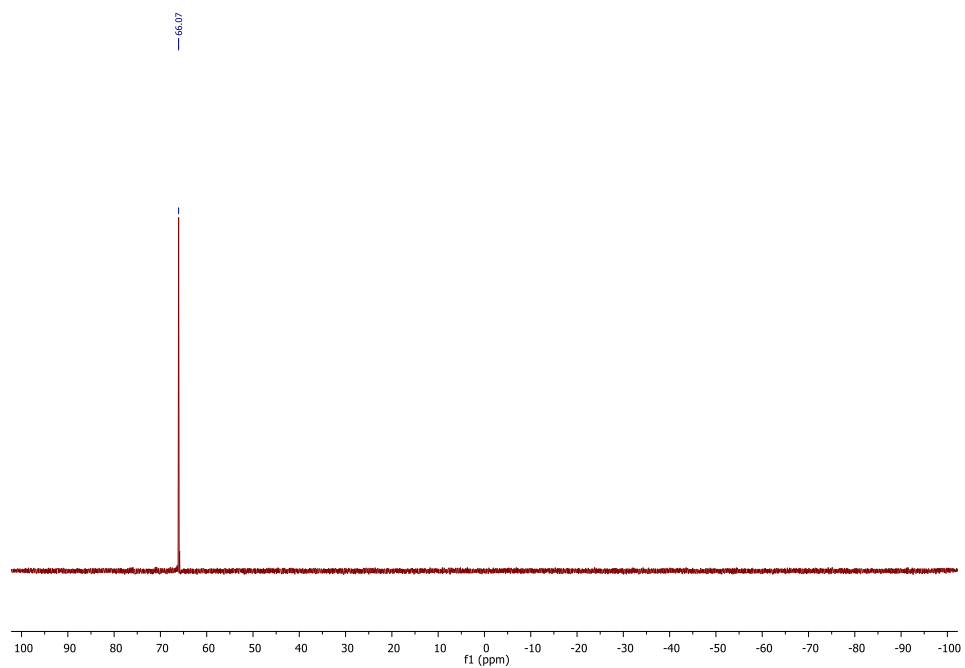

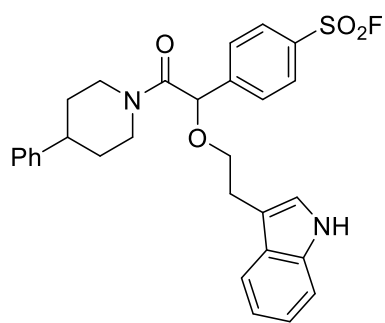

**2-3b**

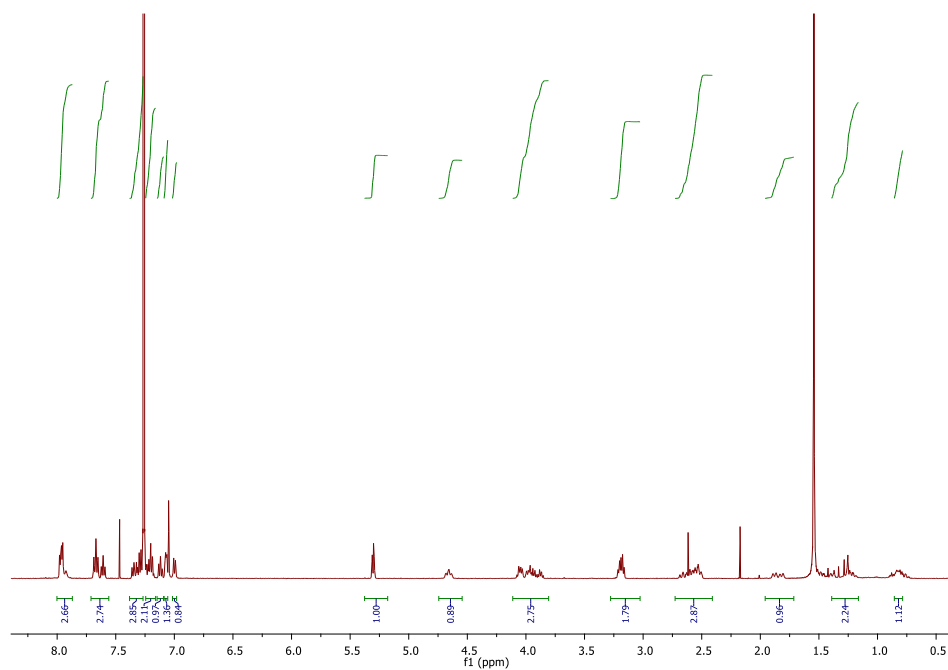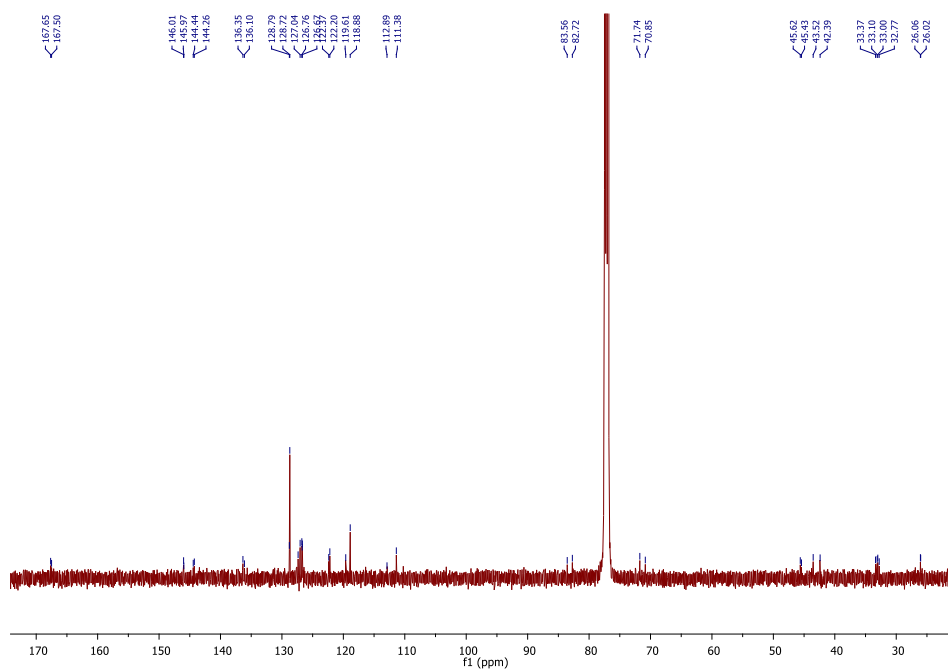



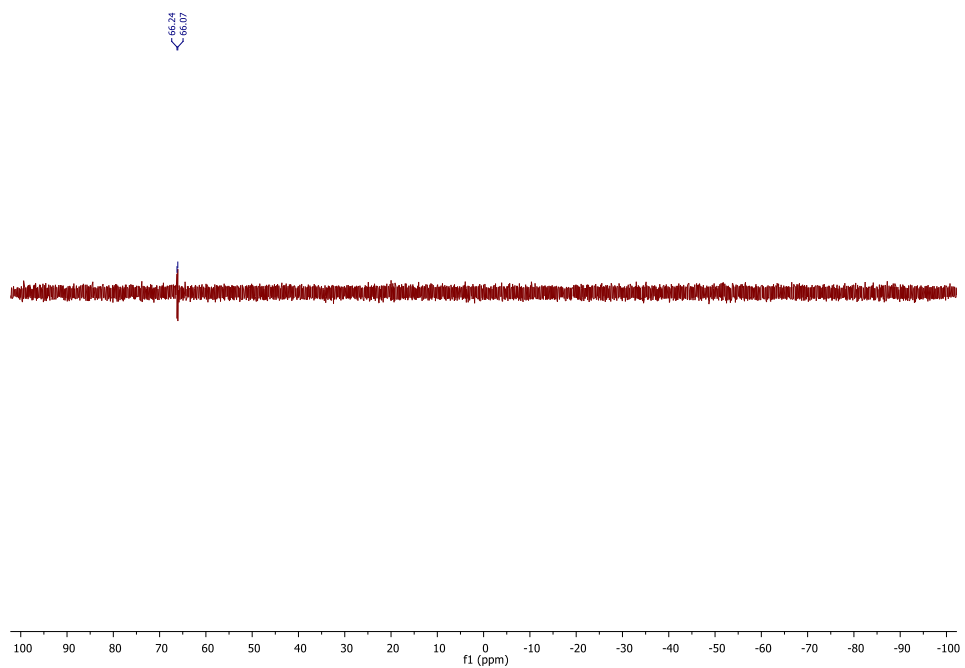

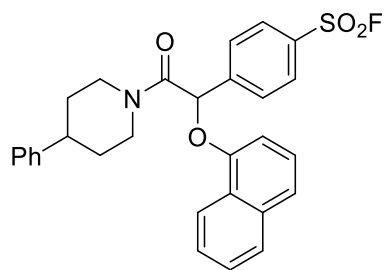

**2-4**

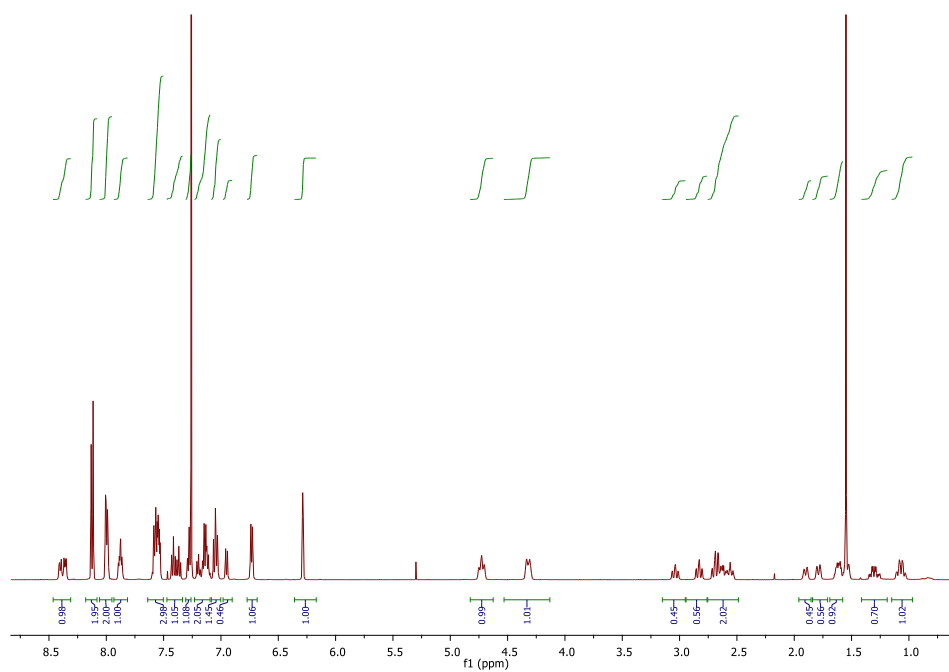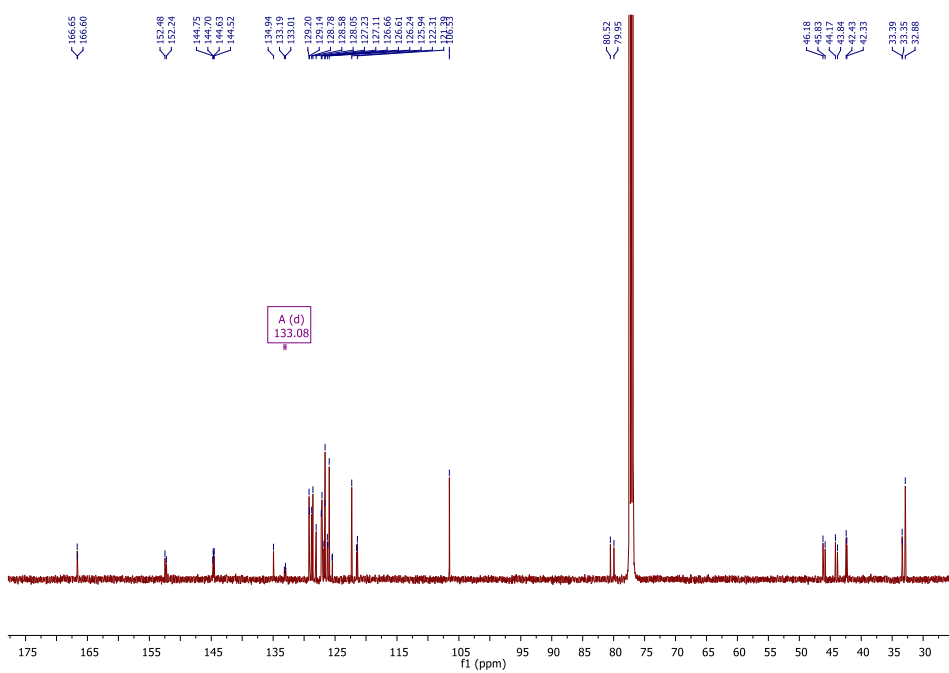

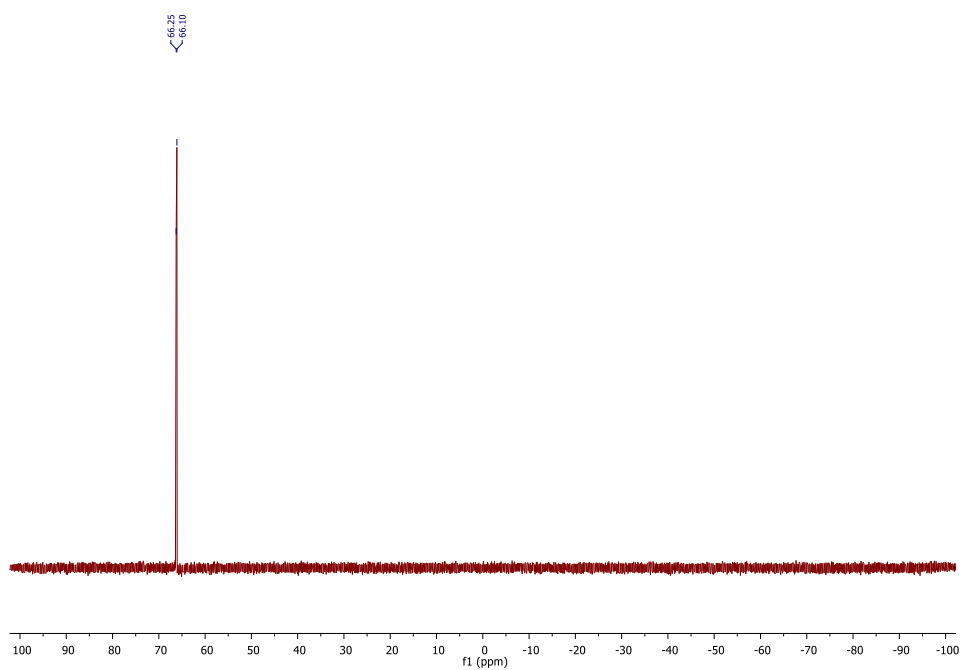

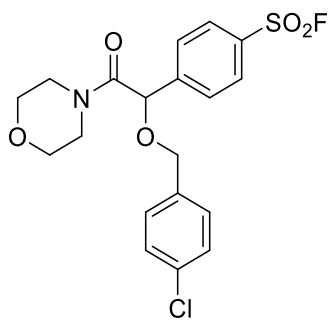

**1-1**

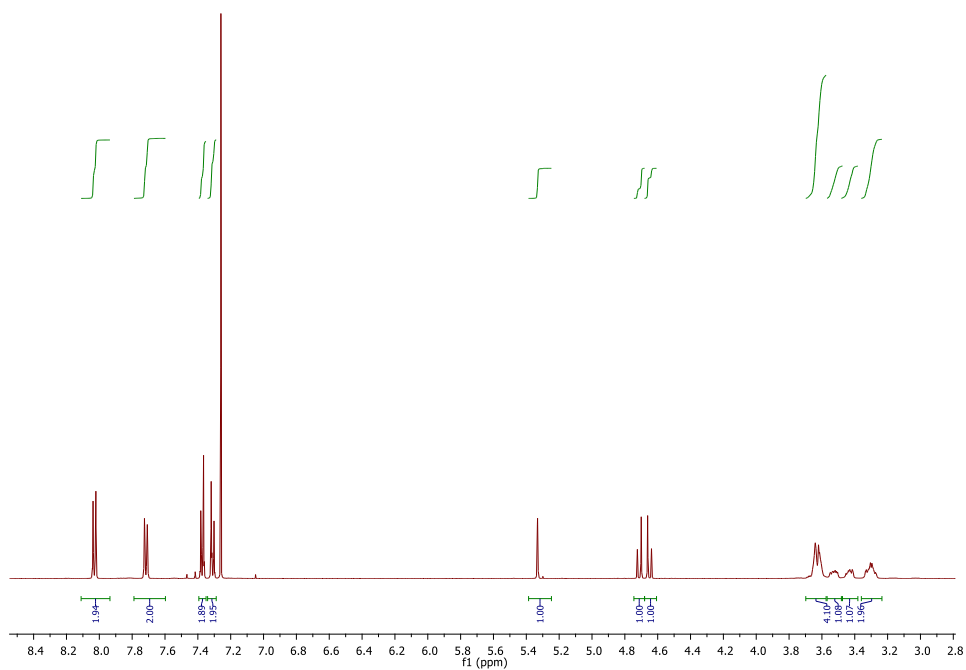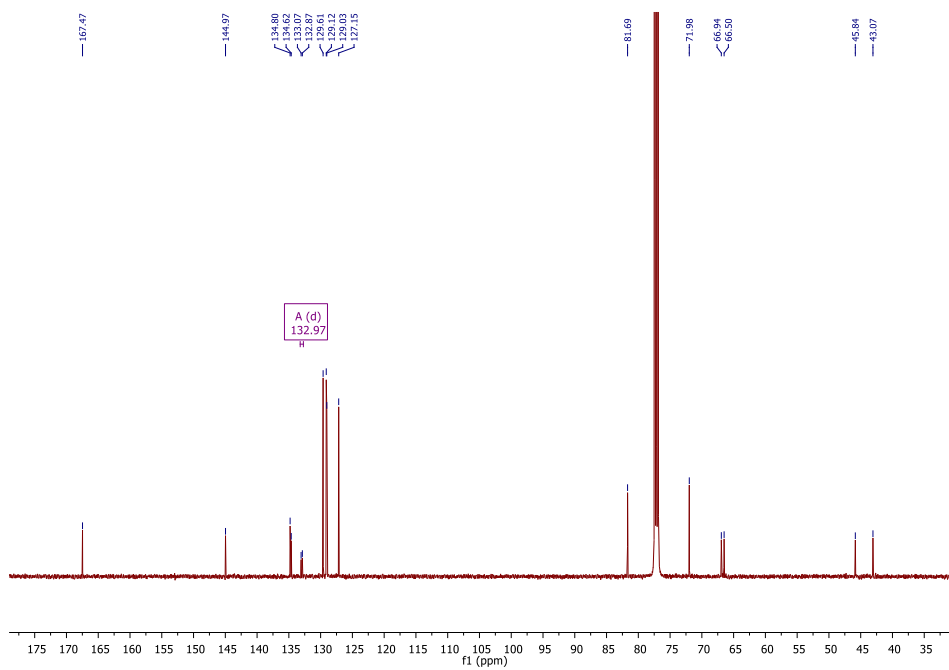

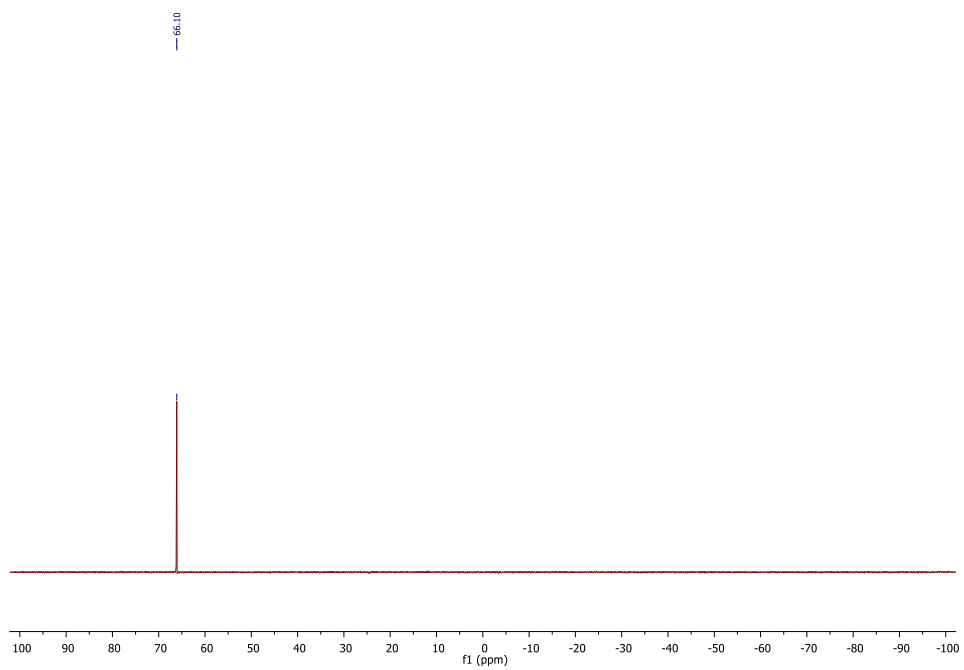

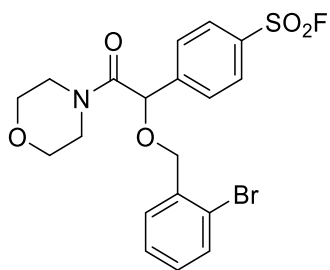

**1-2**

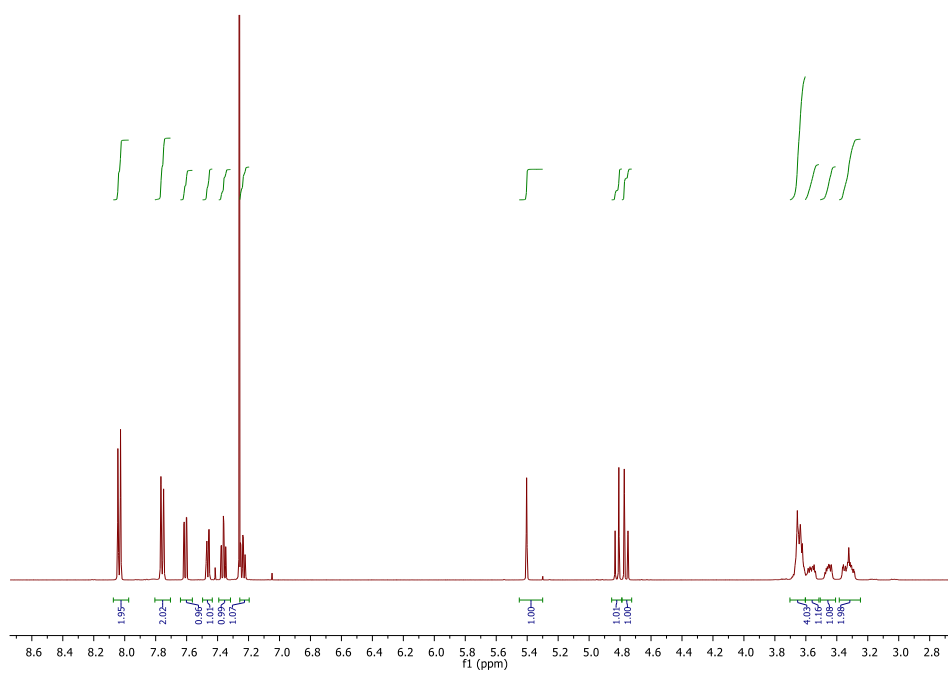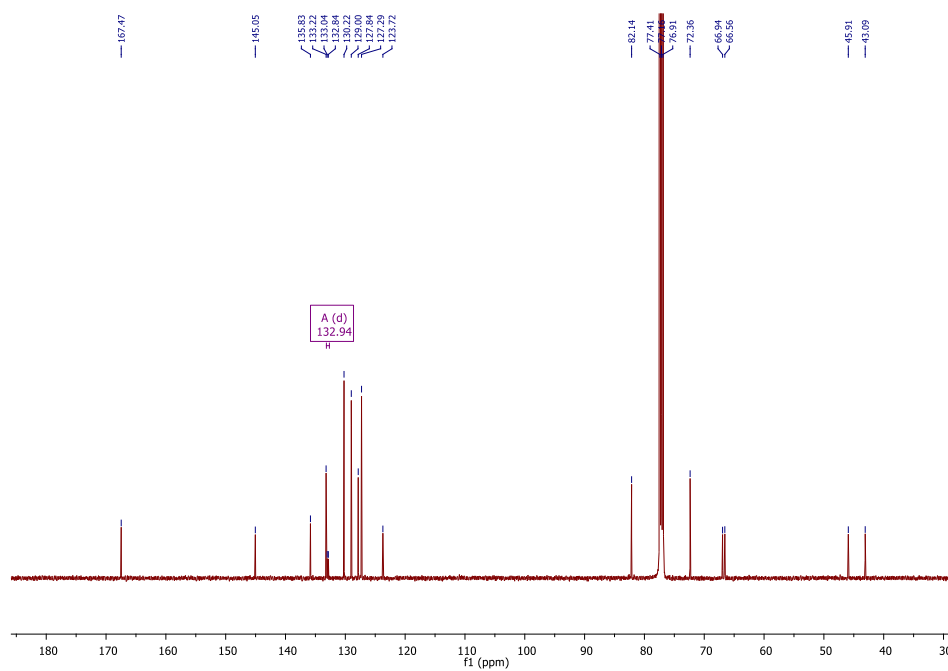

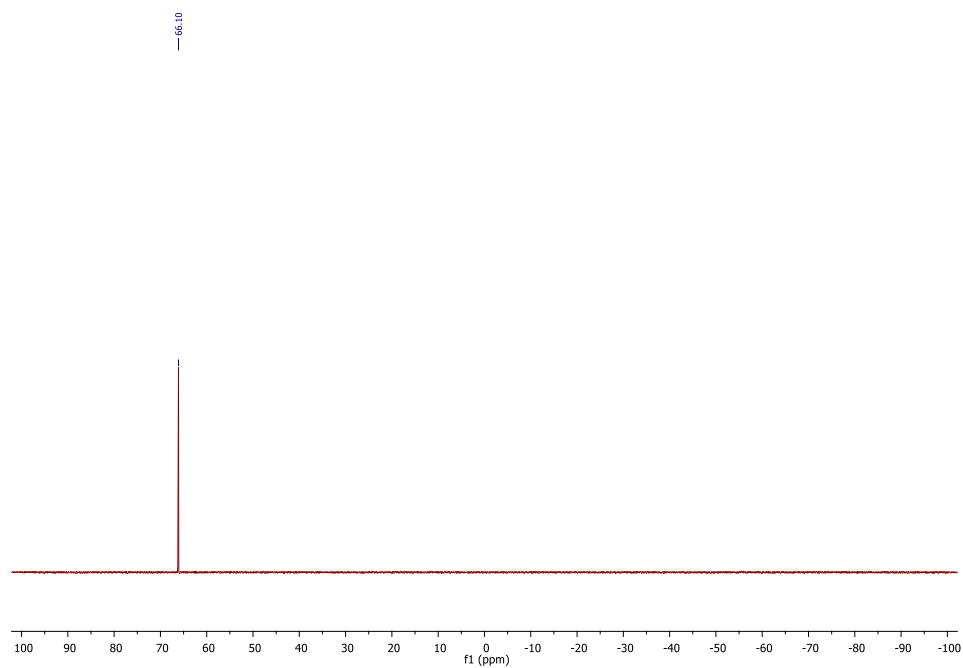

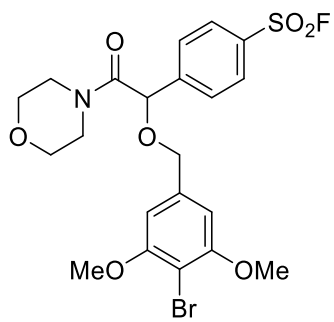

1-8

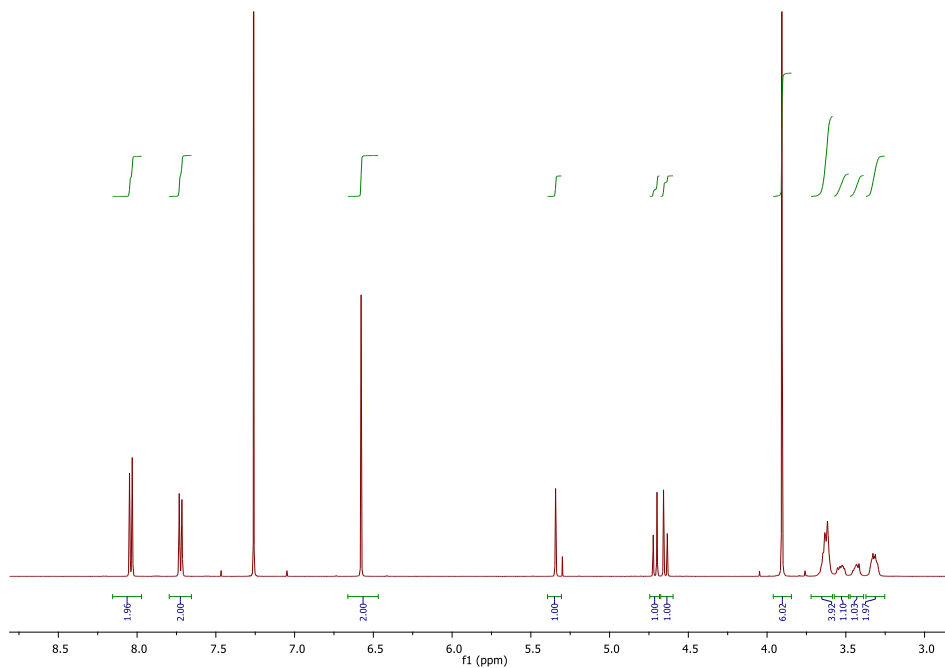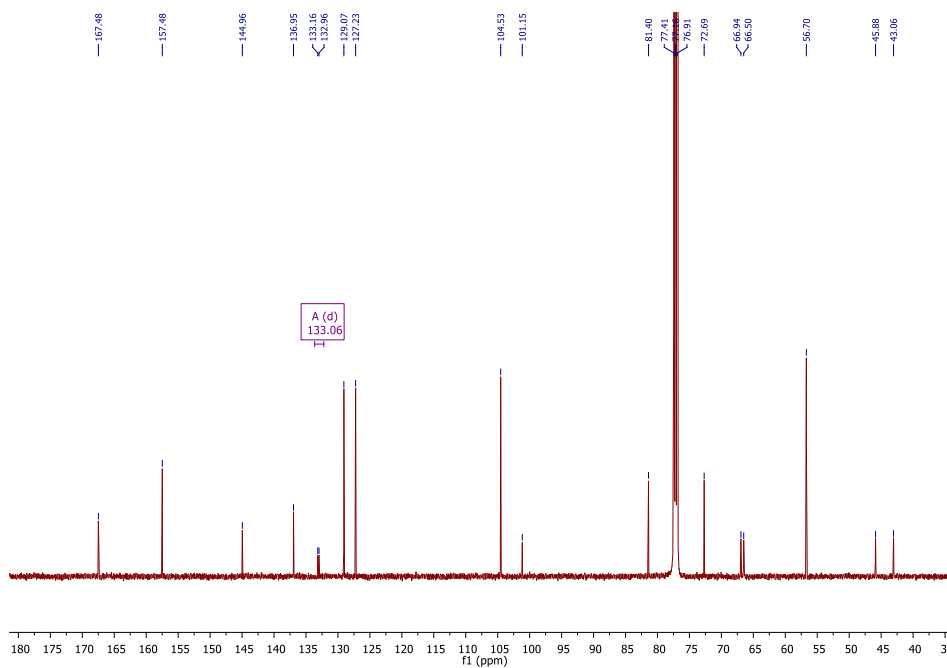



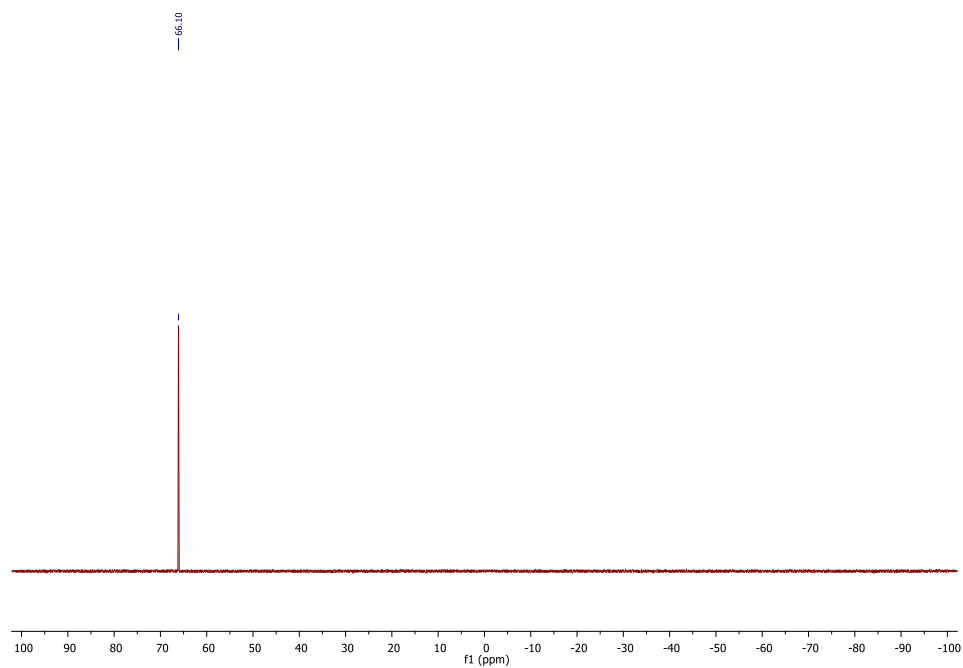

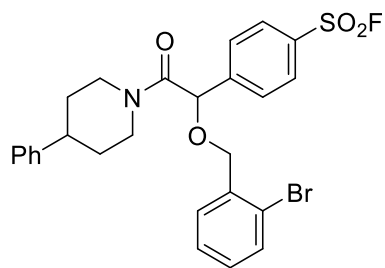

**2-2**

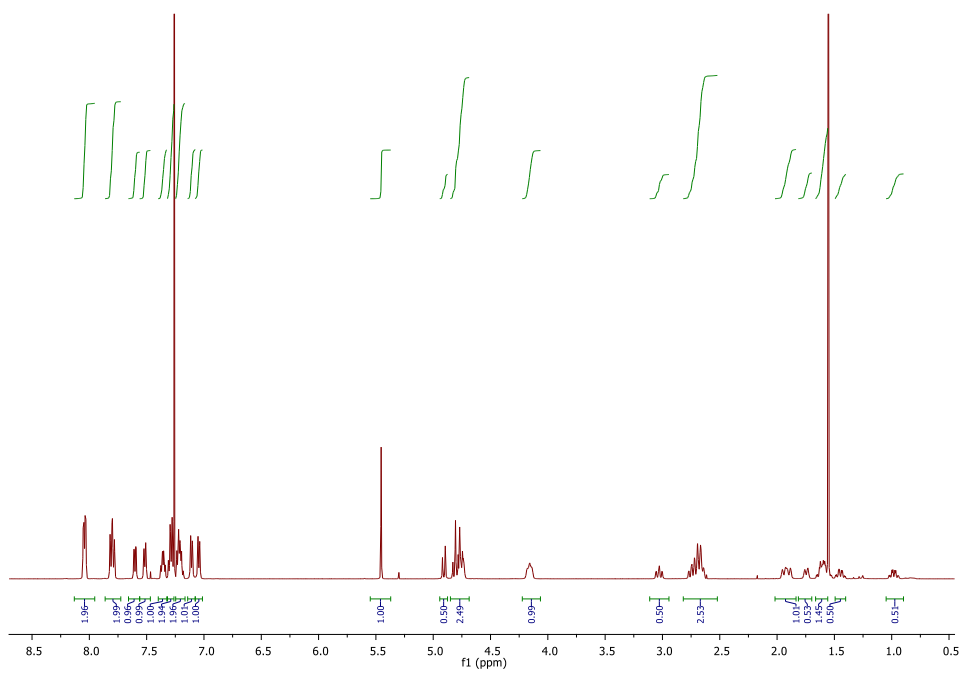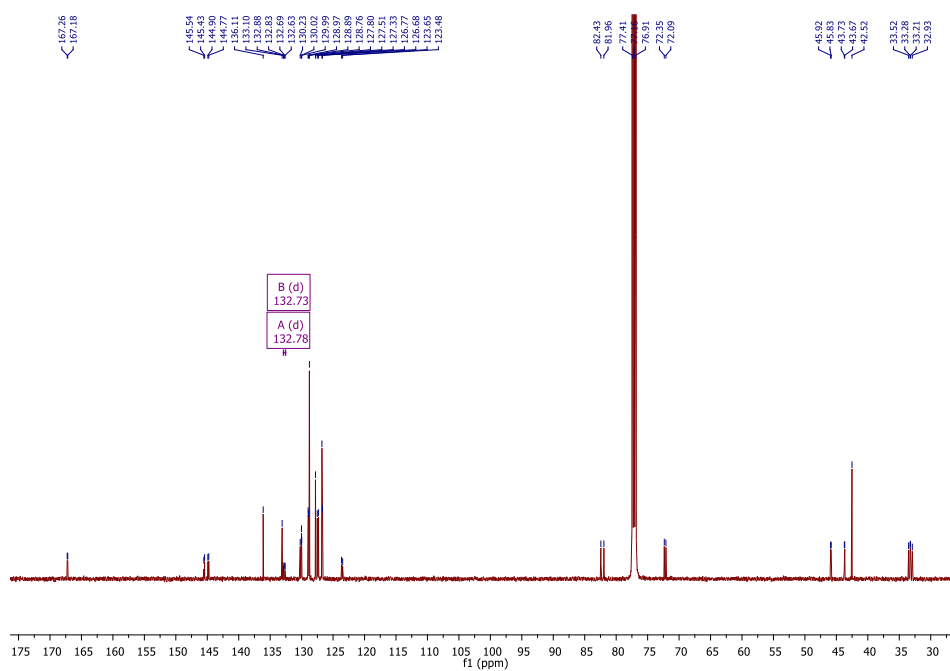

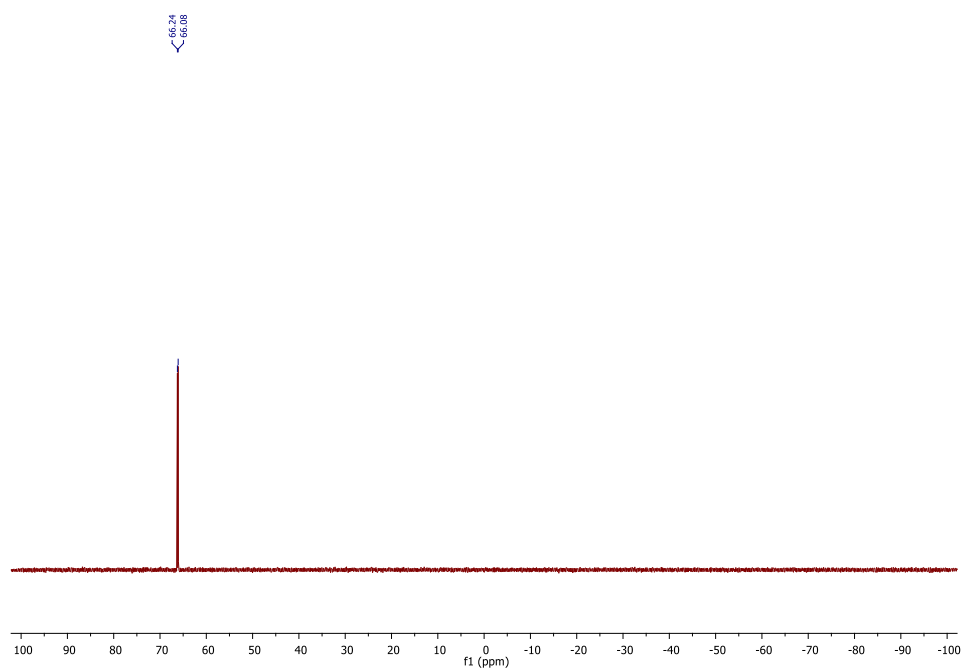

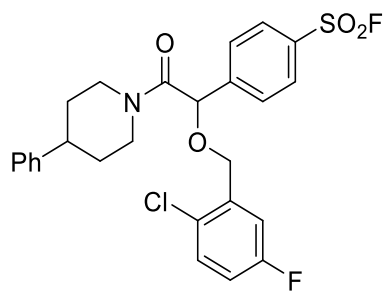

2-5

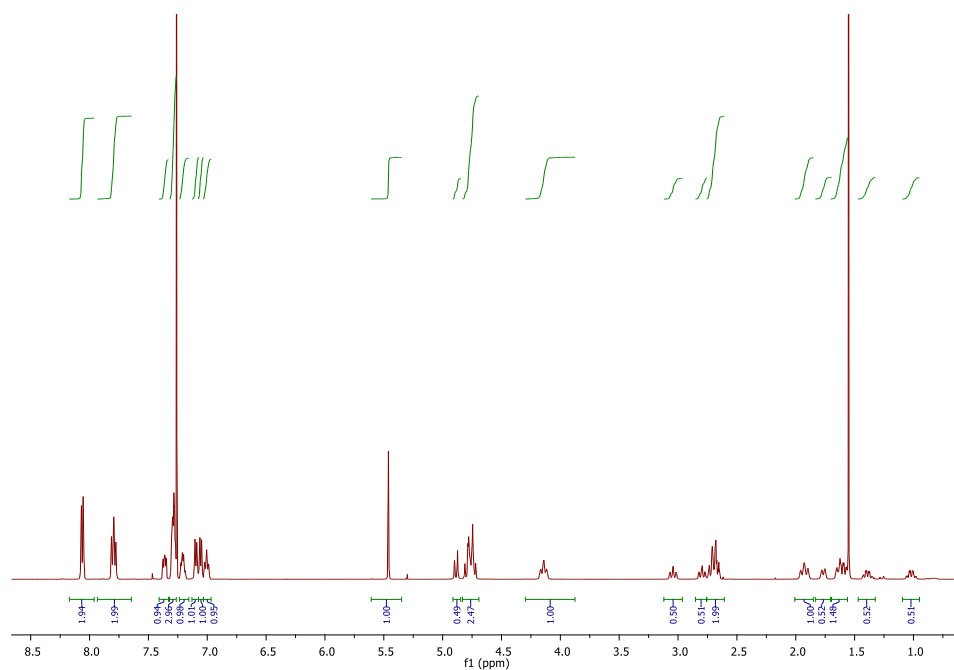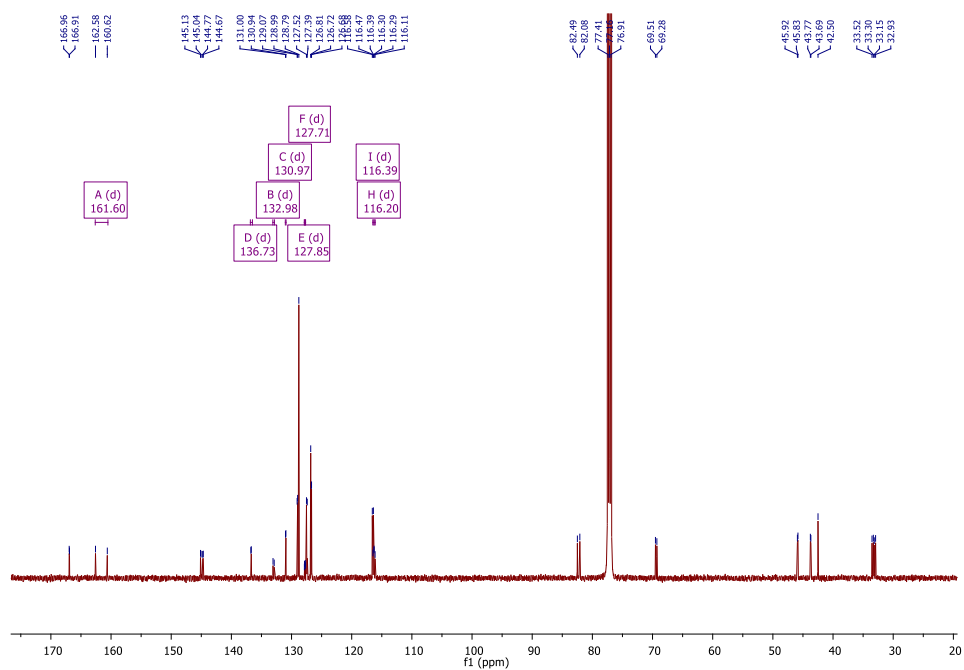

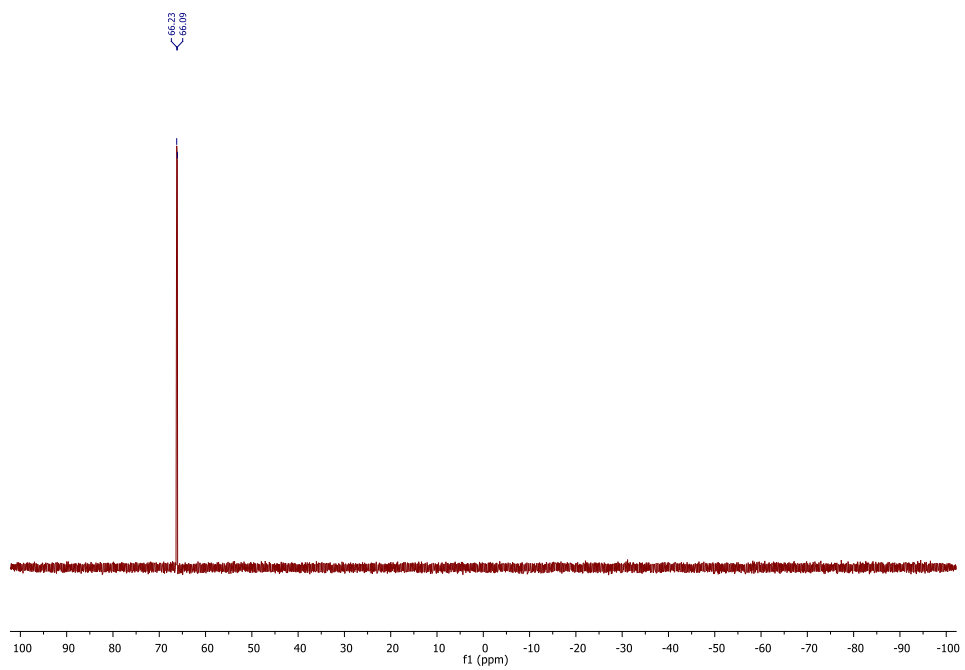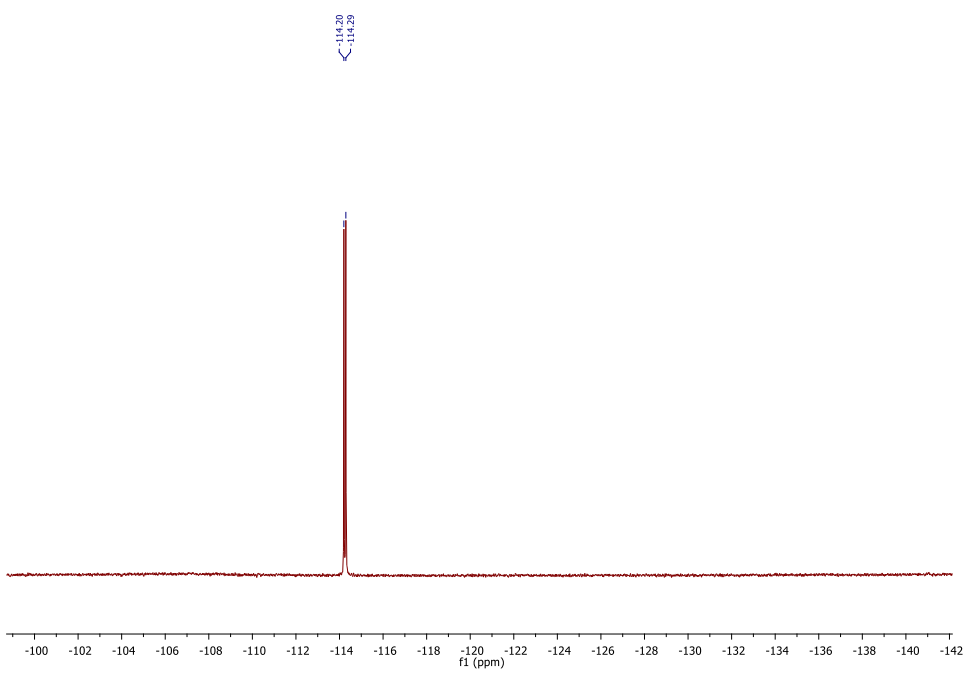

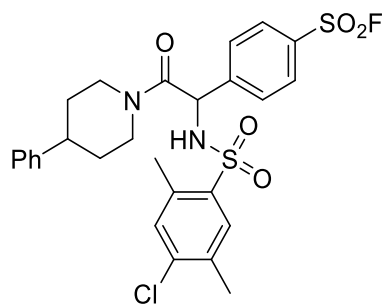

**2-6**

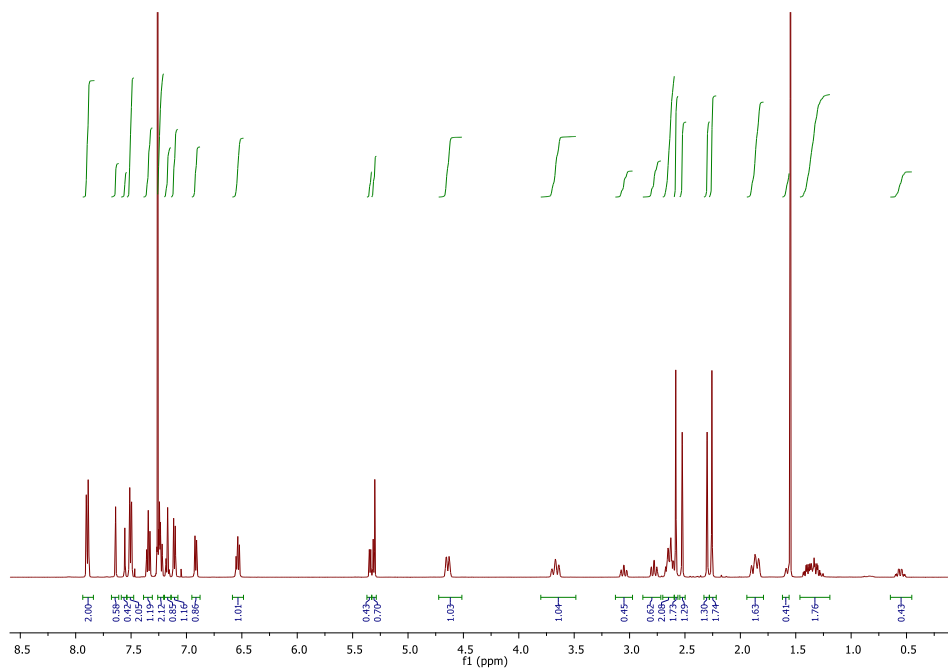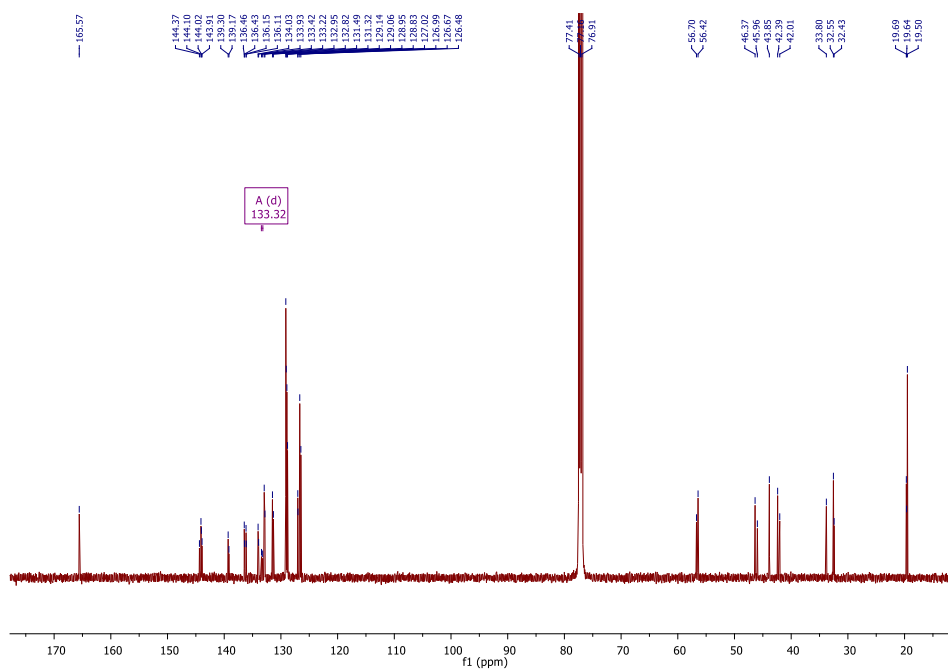

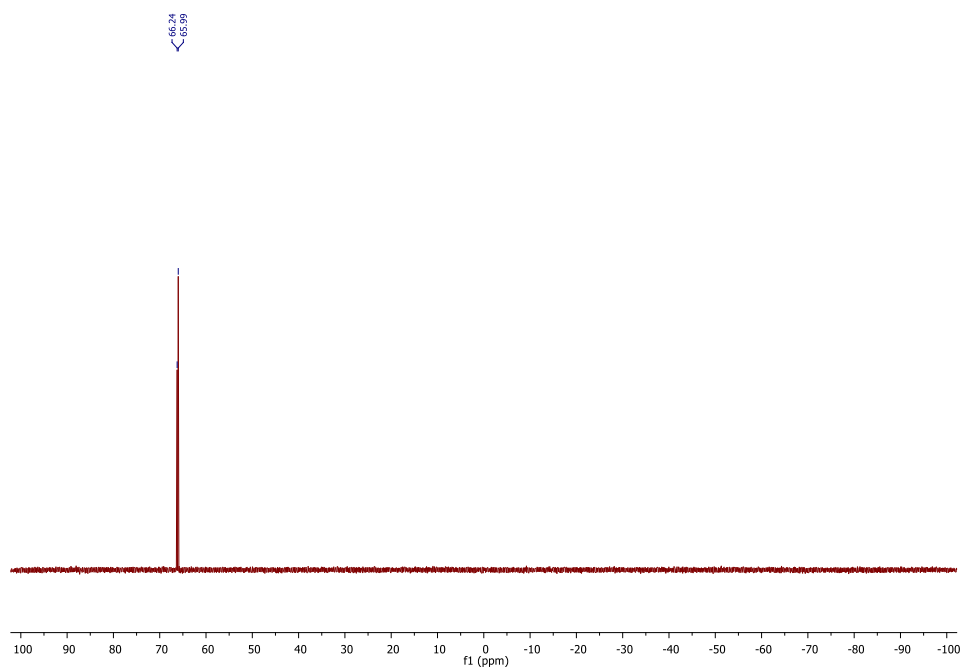

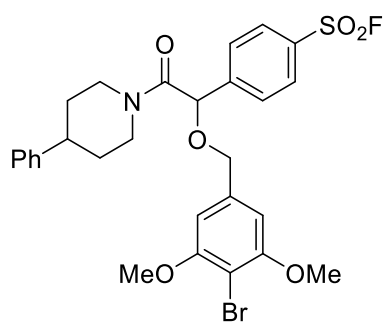

**2-8**

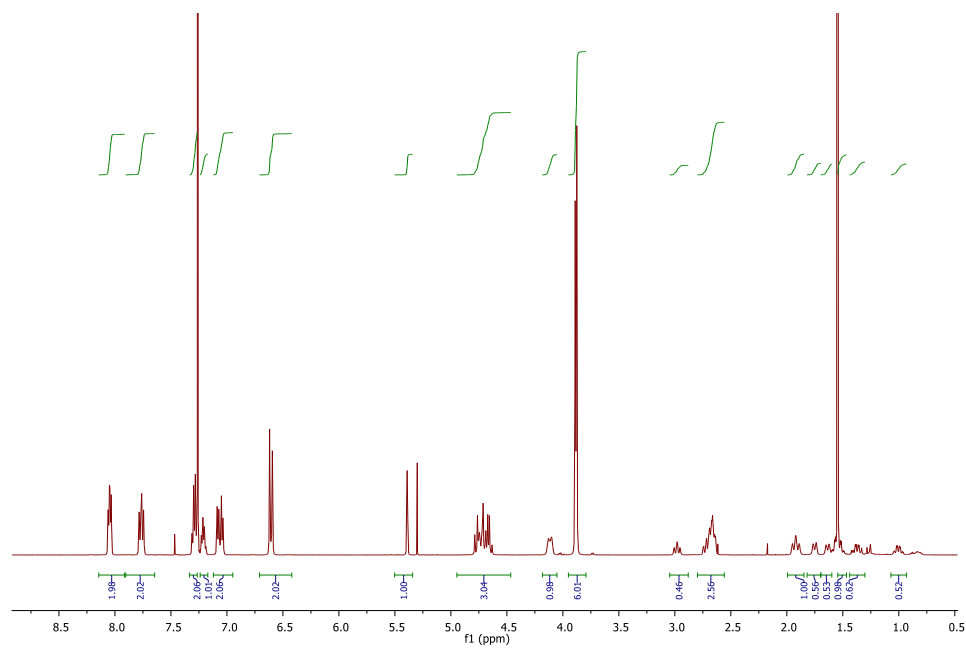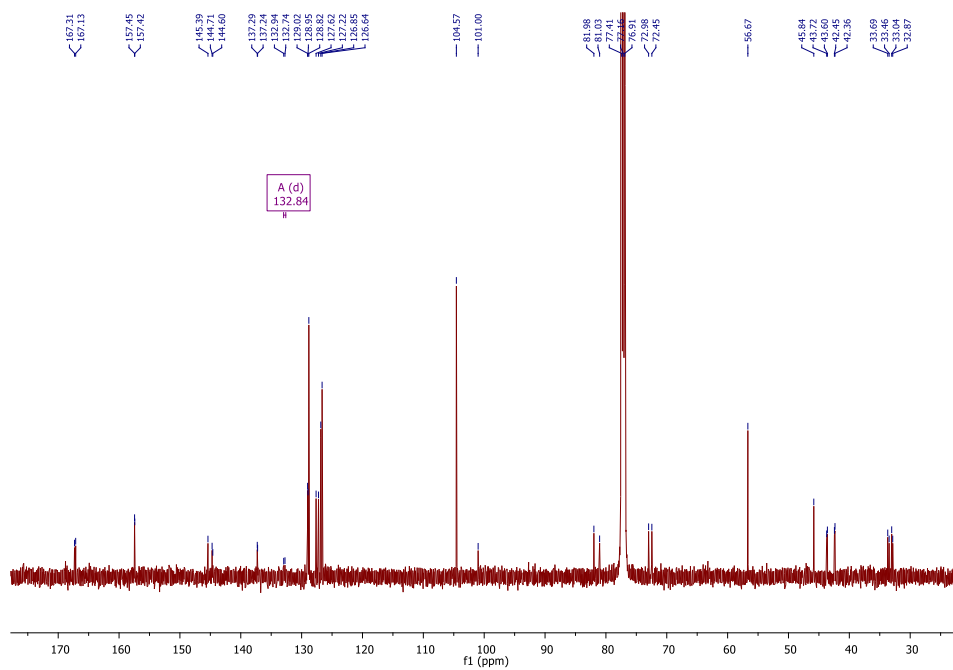



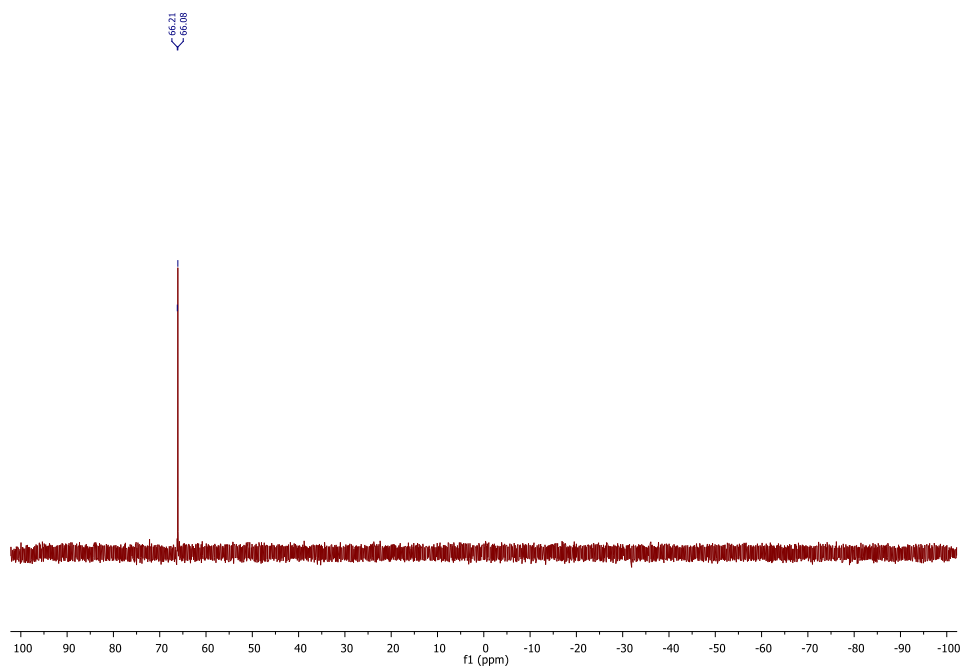

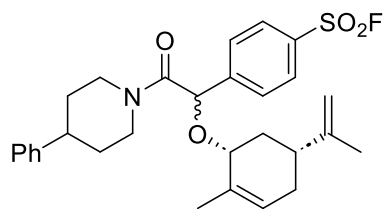

**2-14**

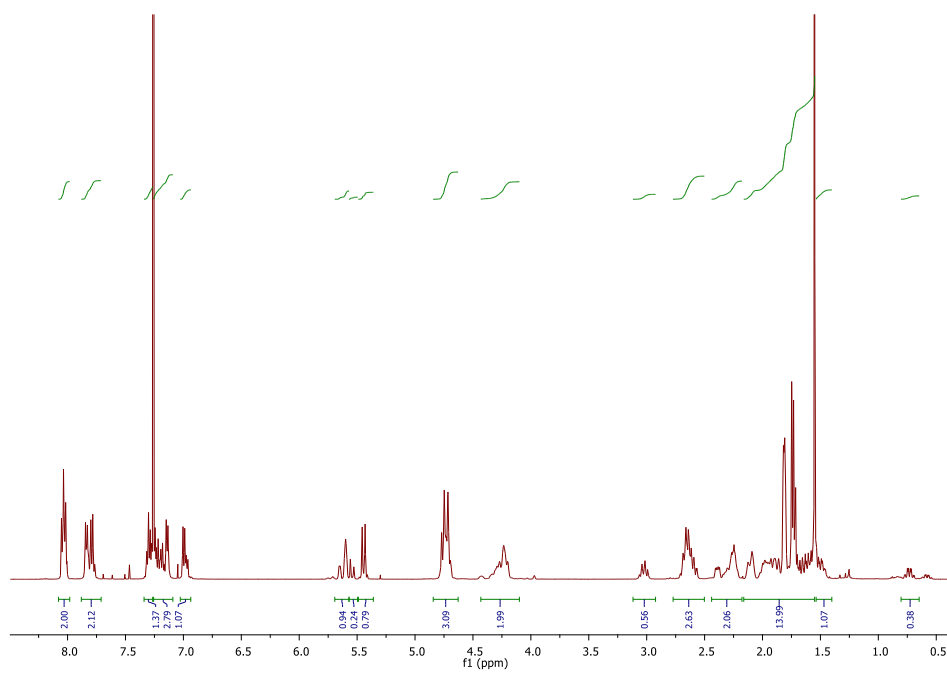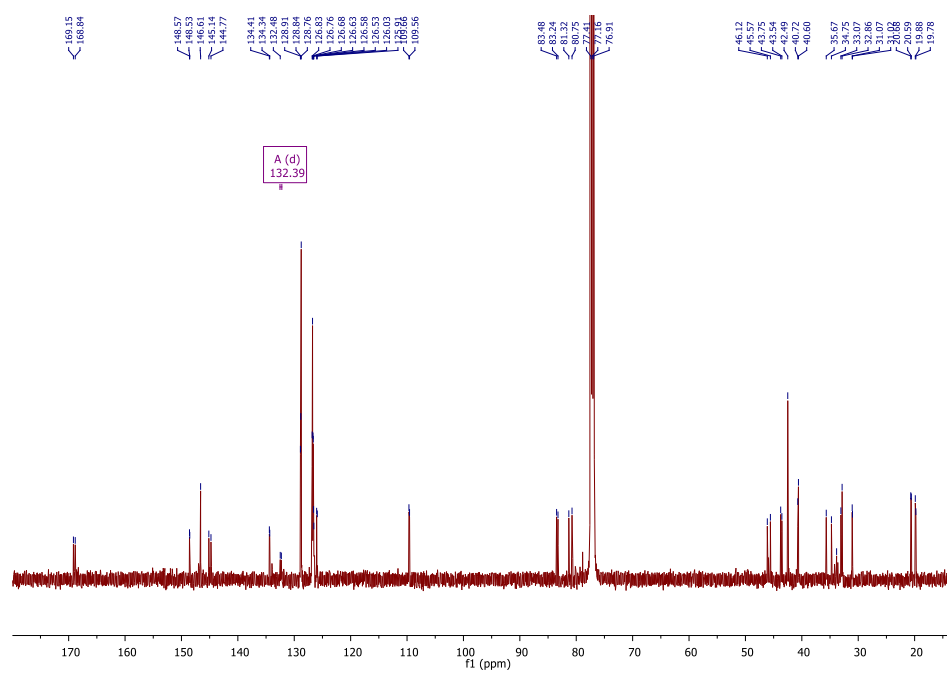

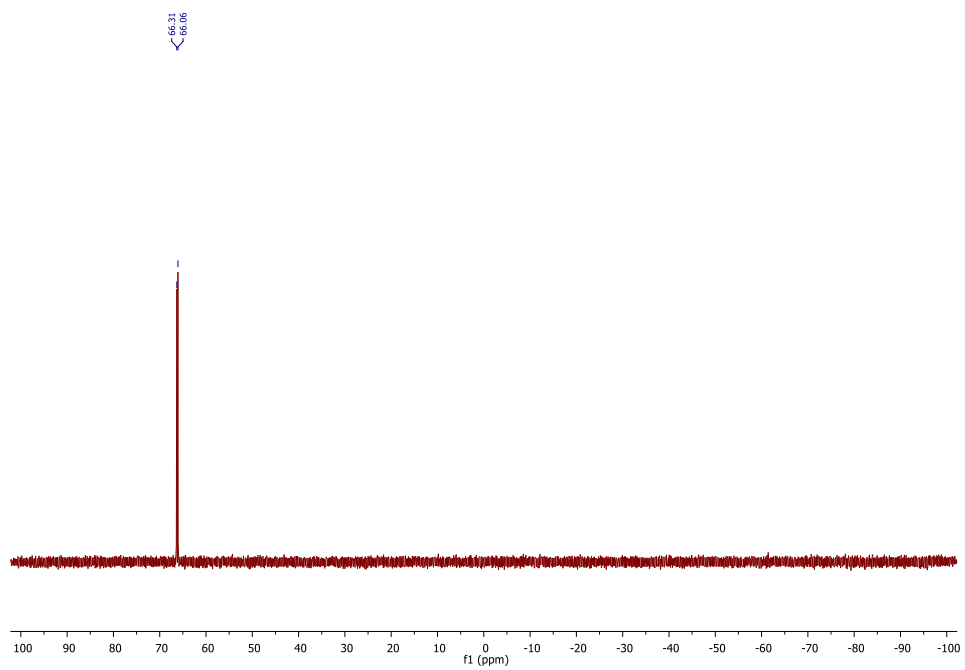

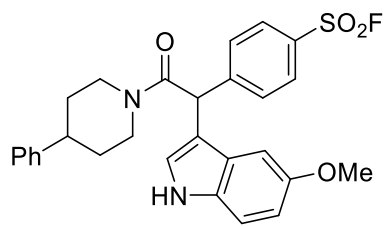

**2-15a**

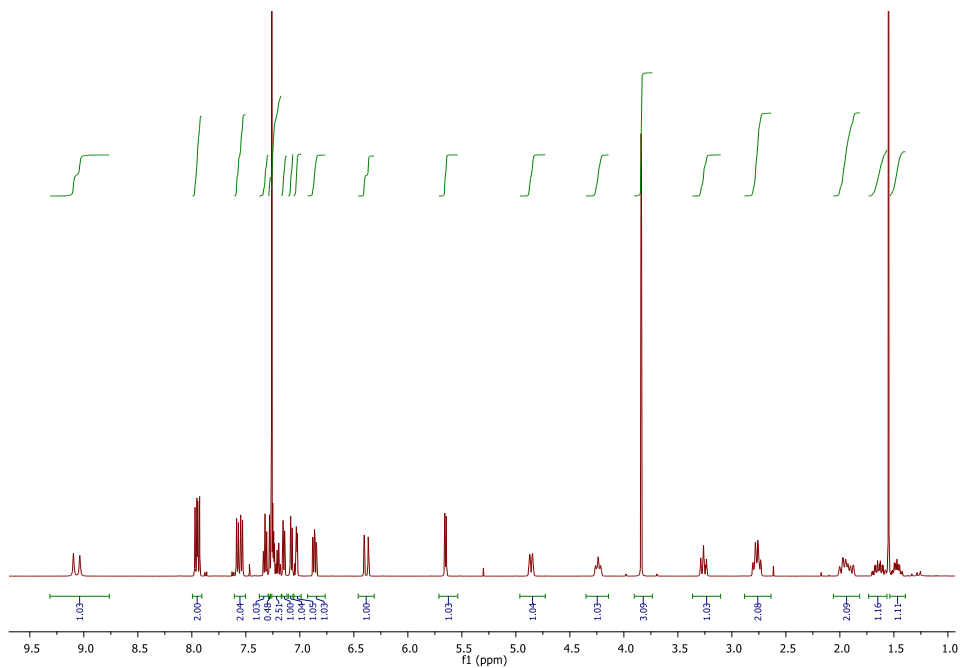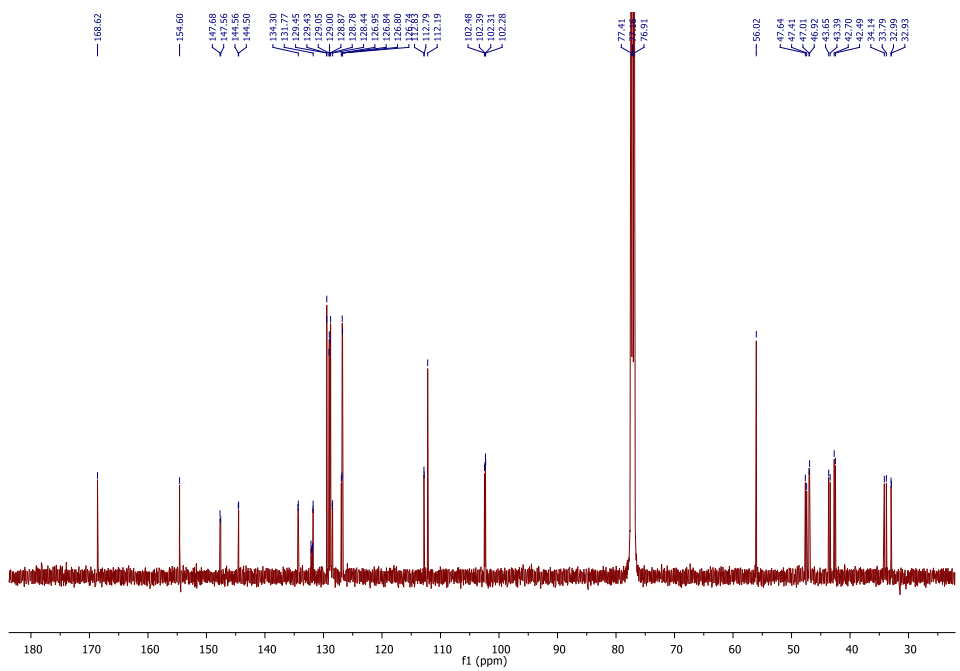

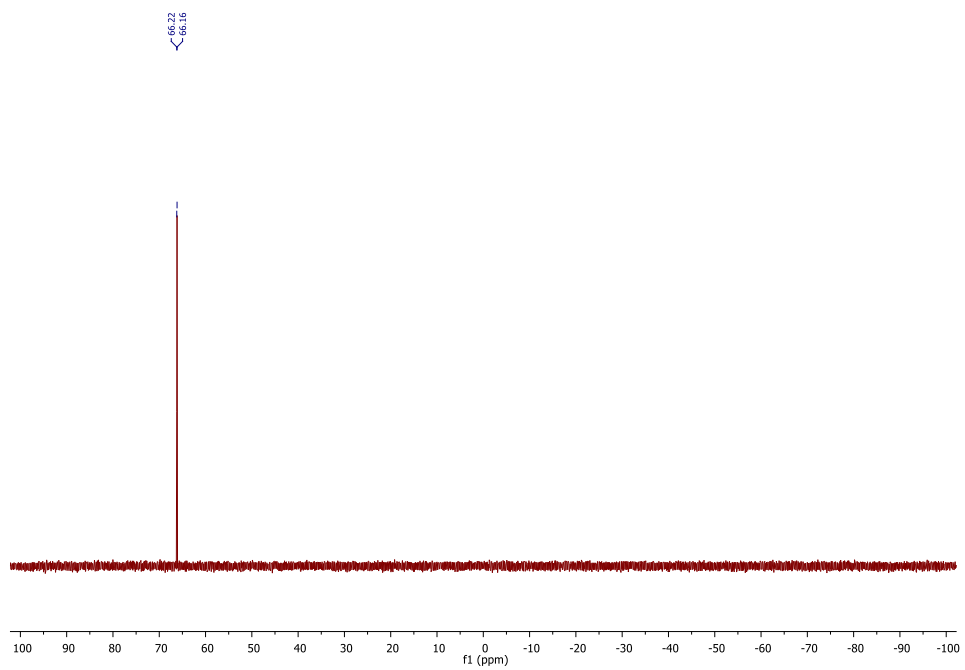

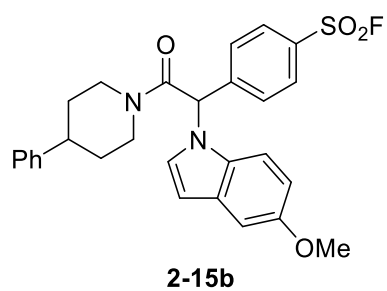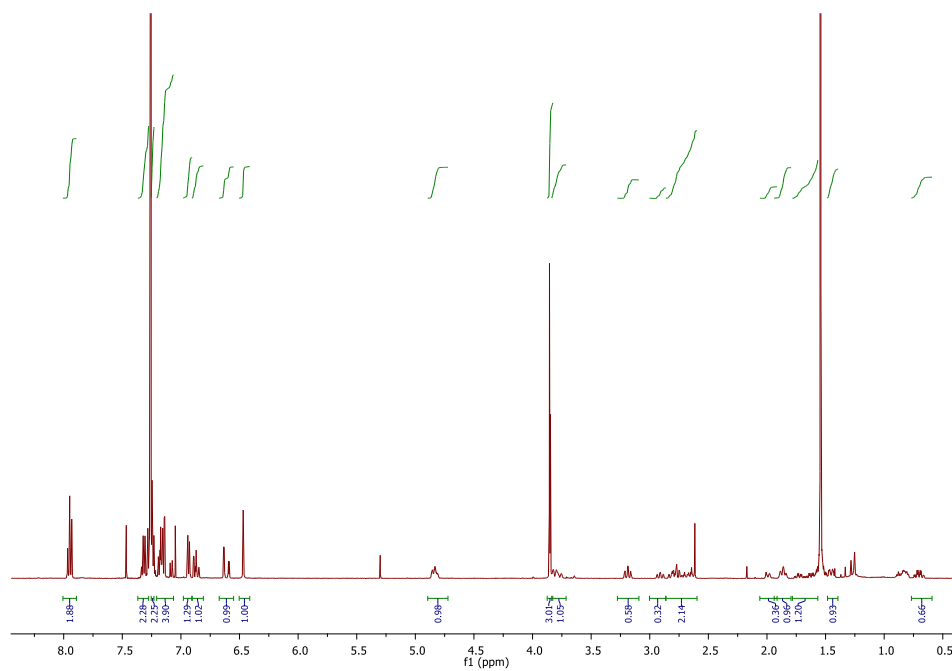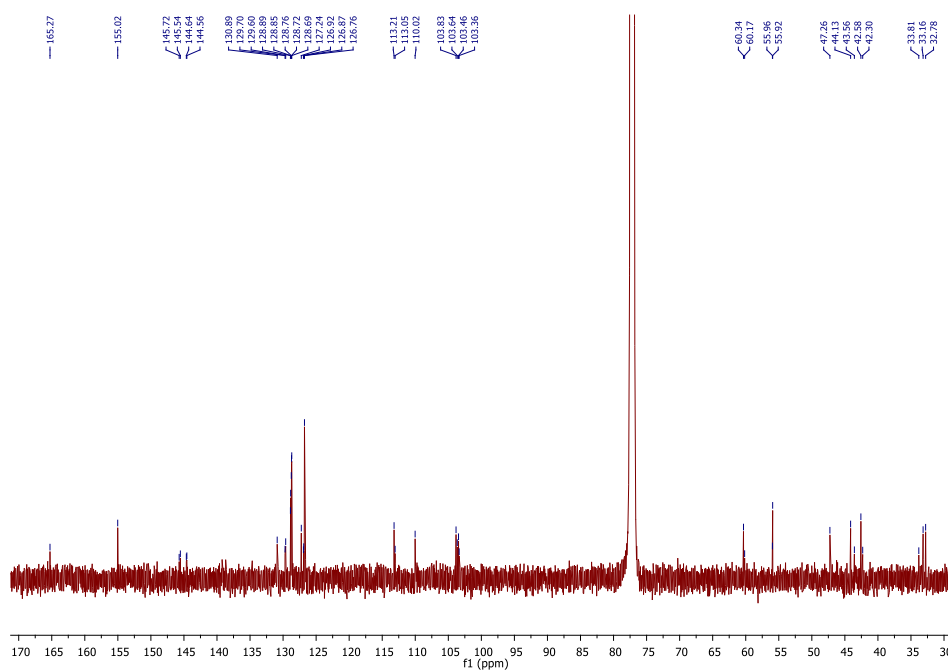

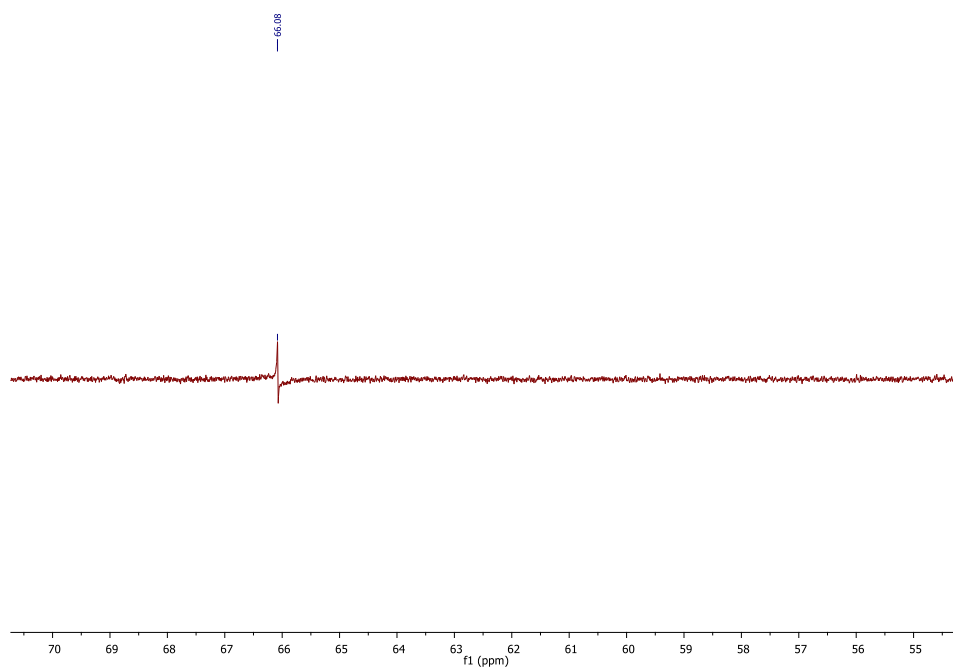

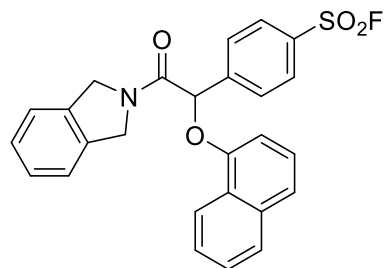

**3-4a**

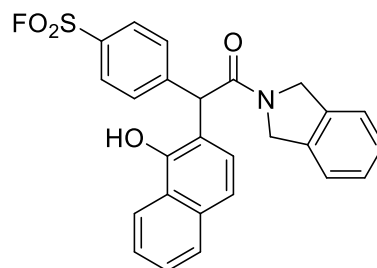

**3-4b**

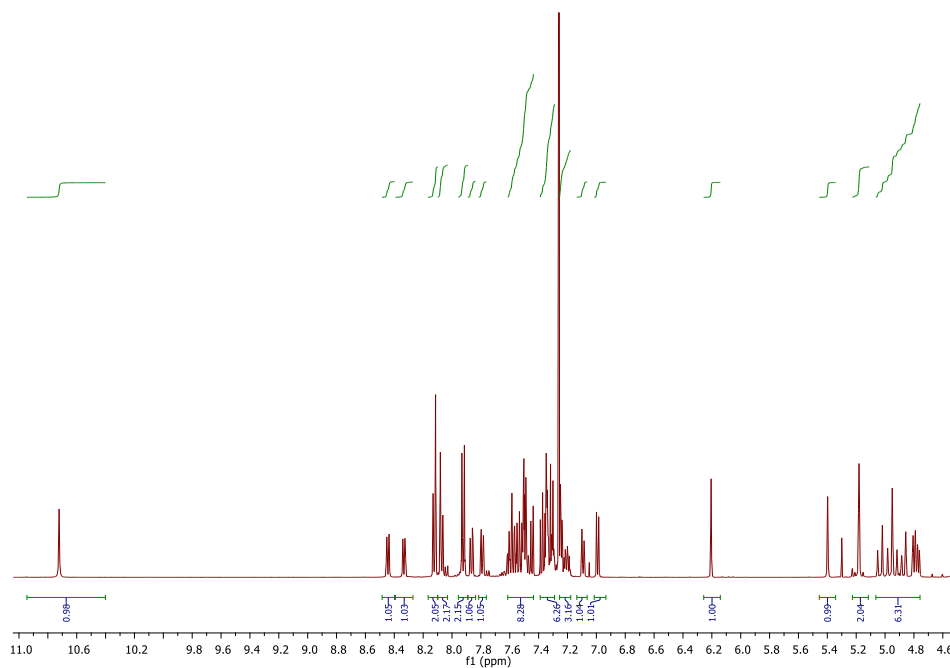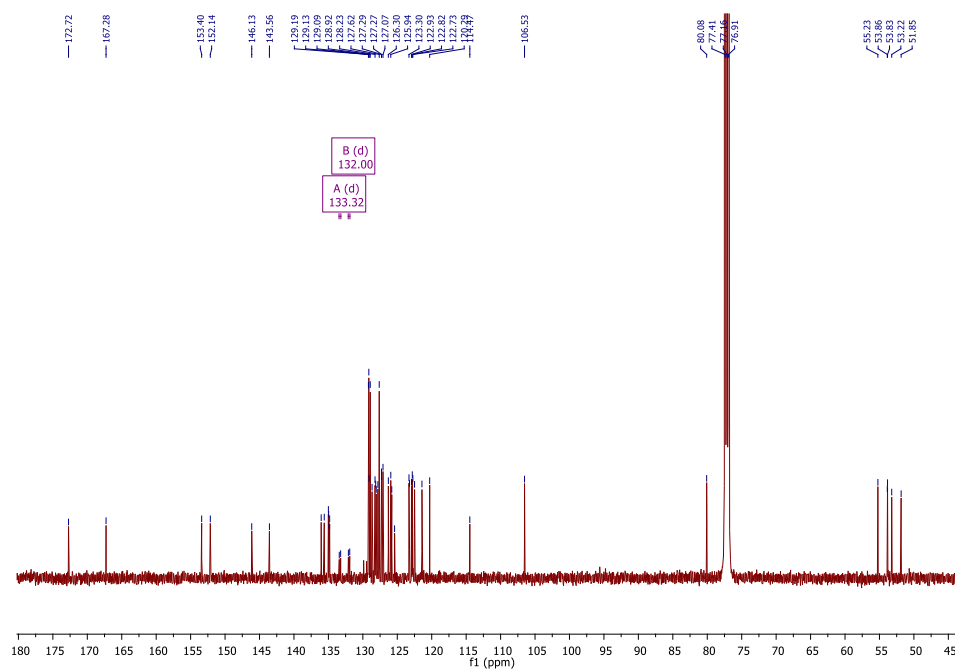



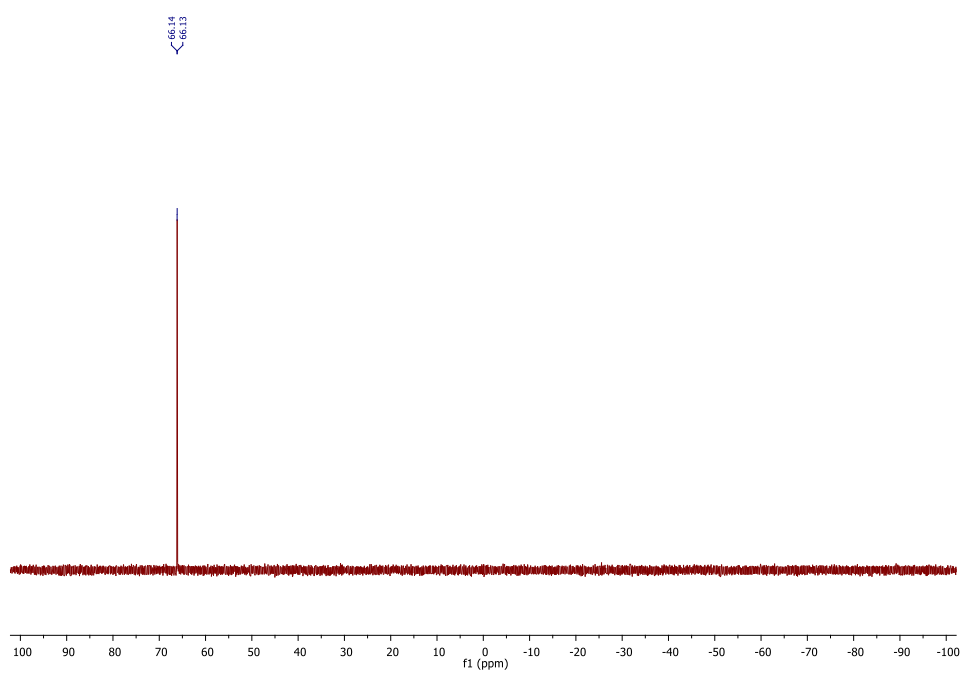

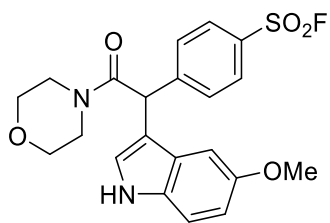

**1-15a**

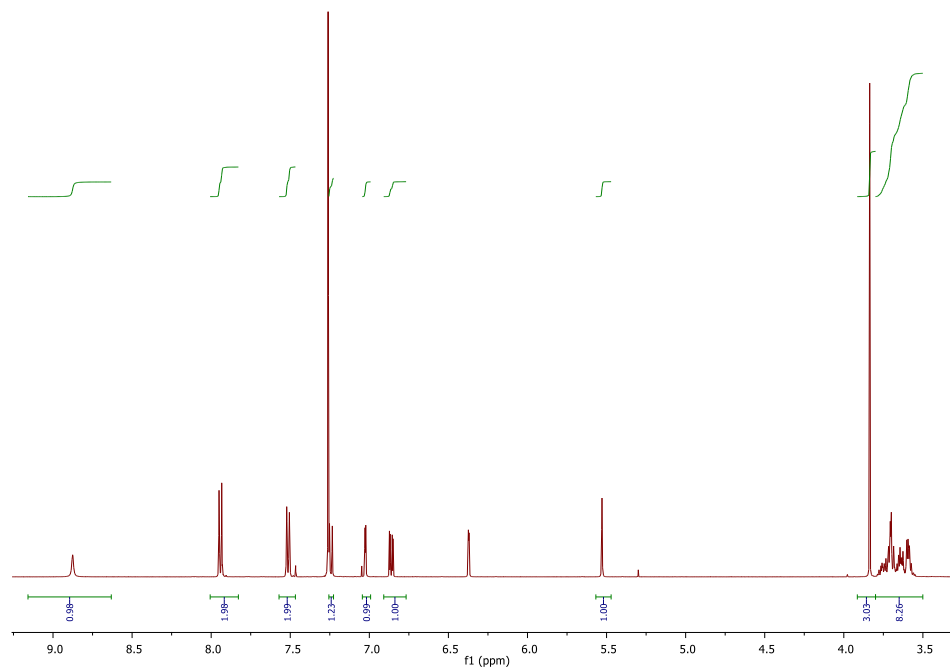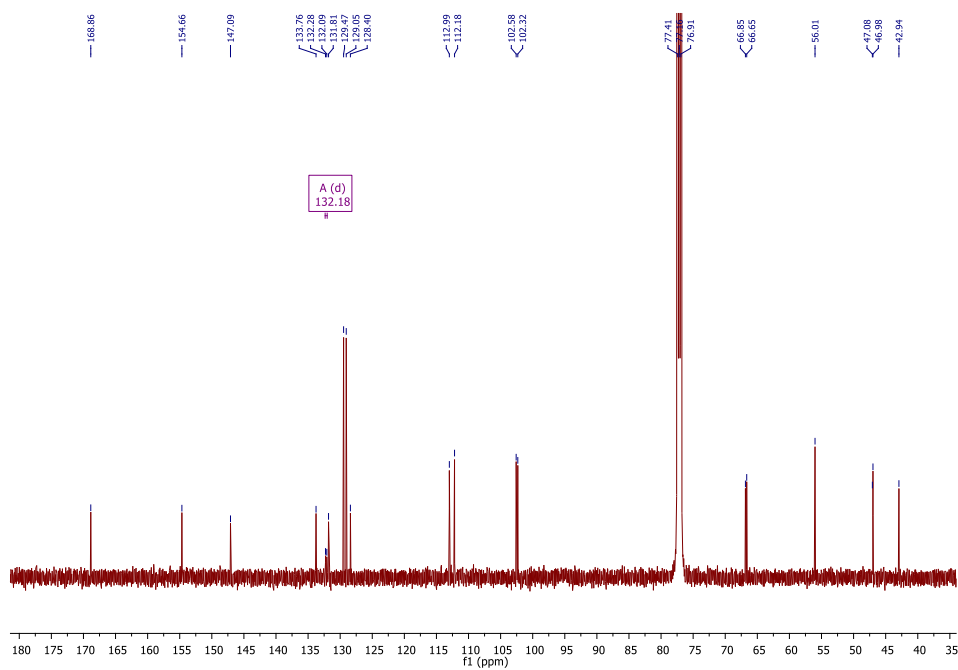

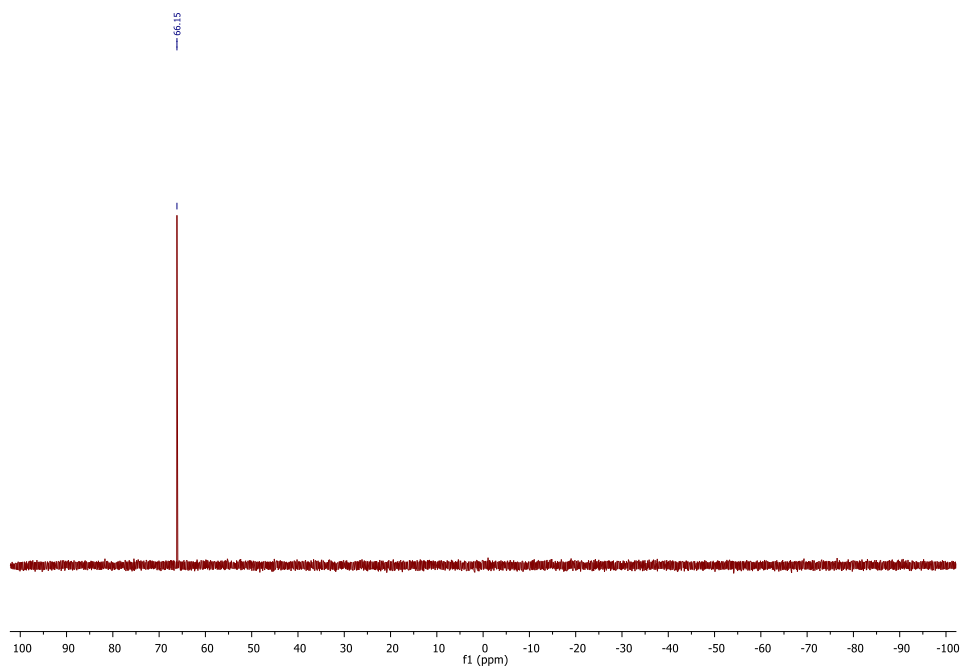

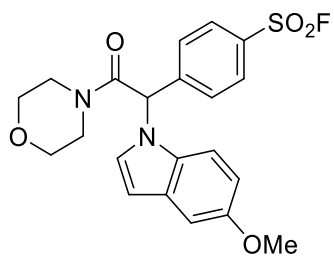

**1-15b**

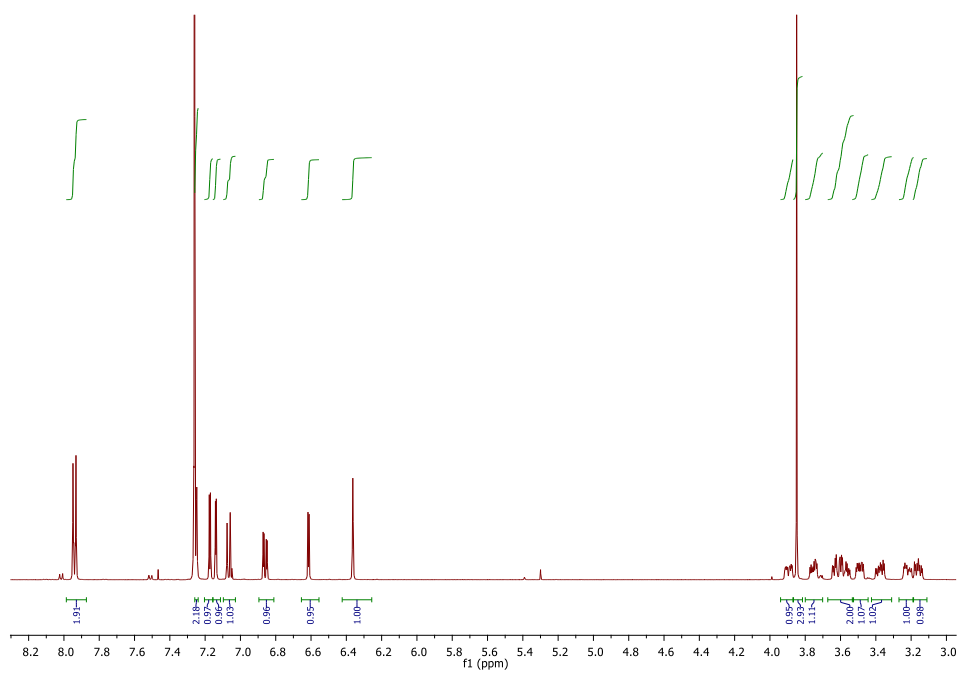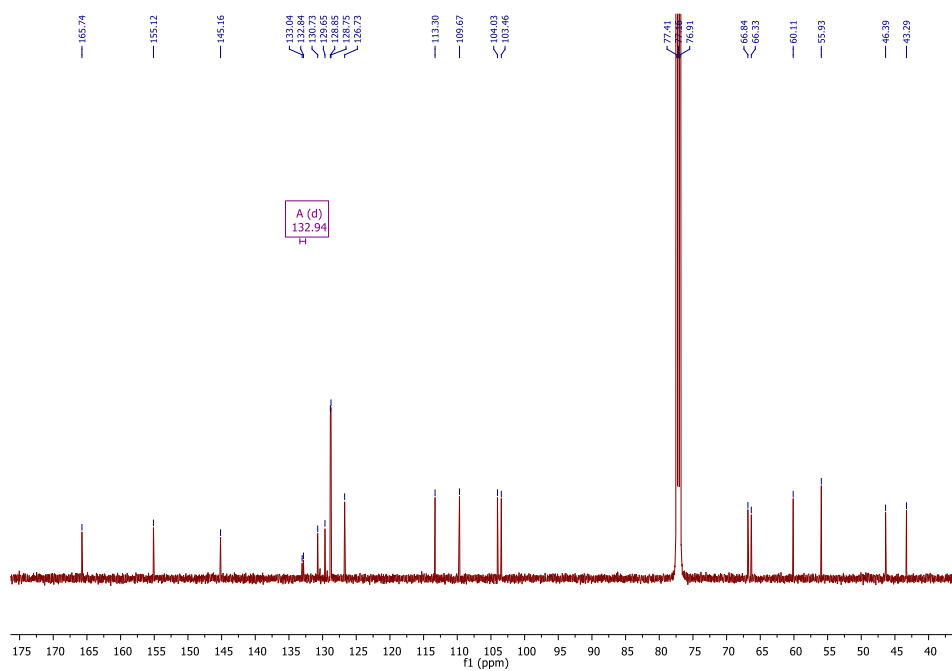

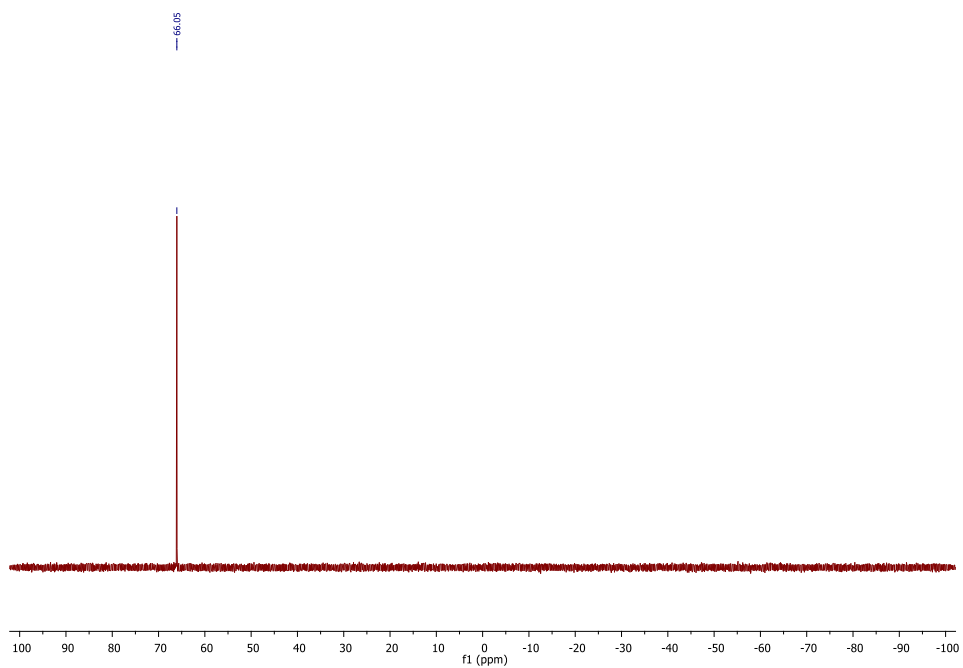

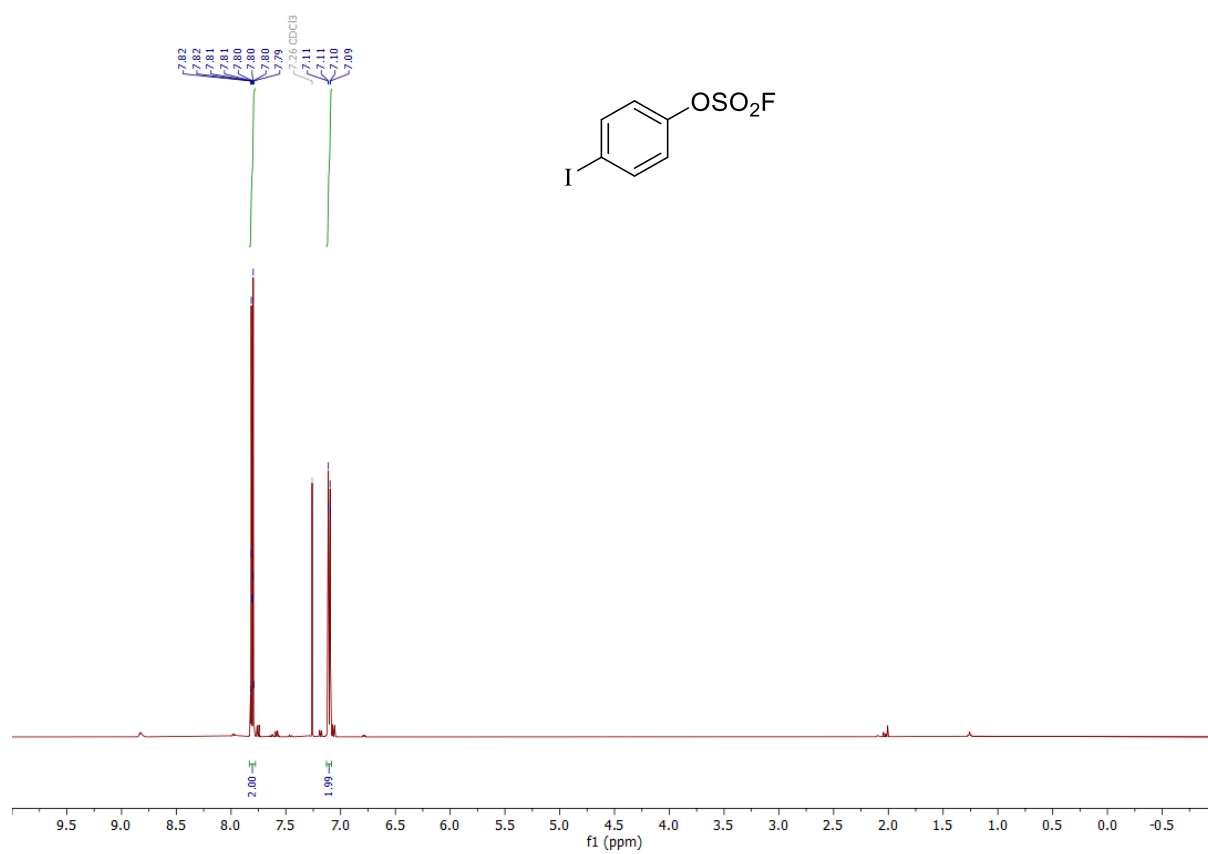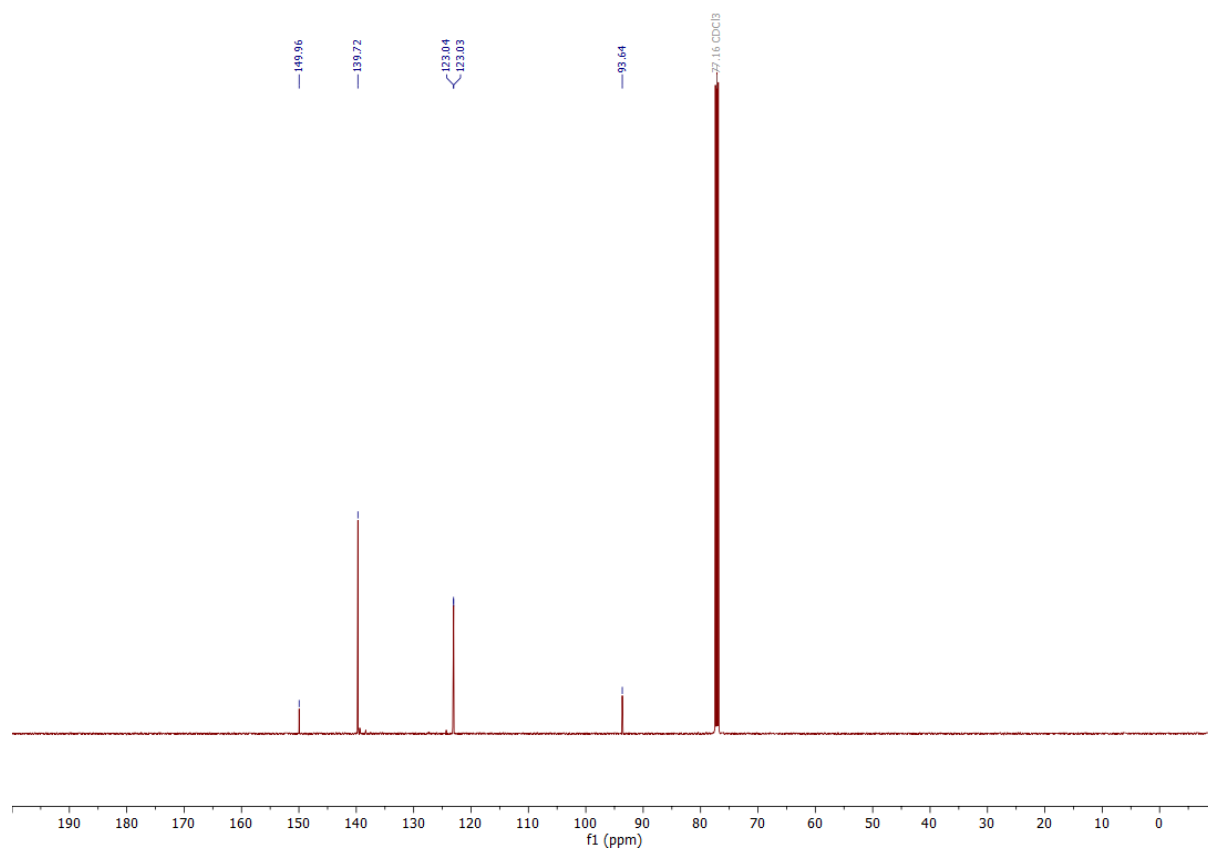

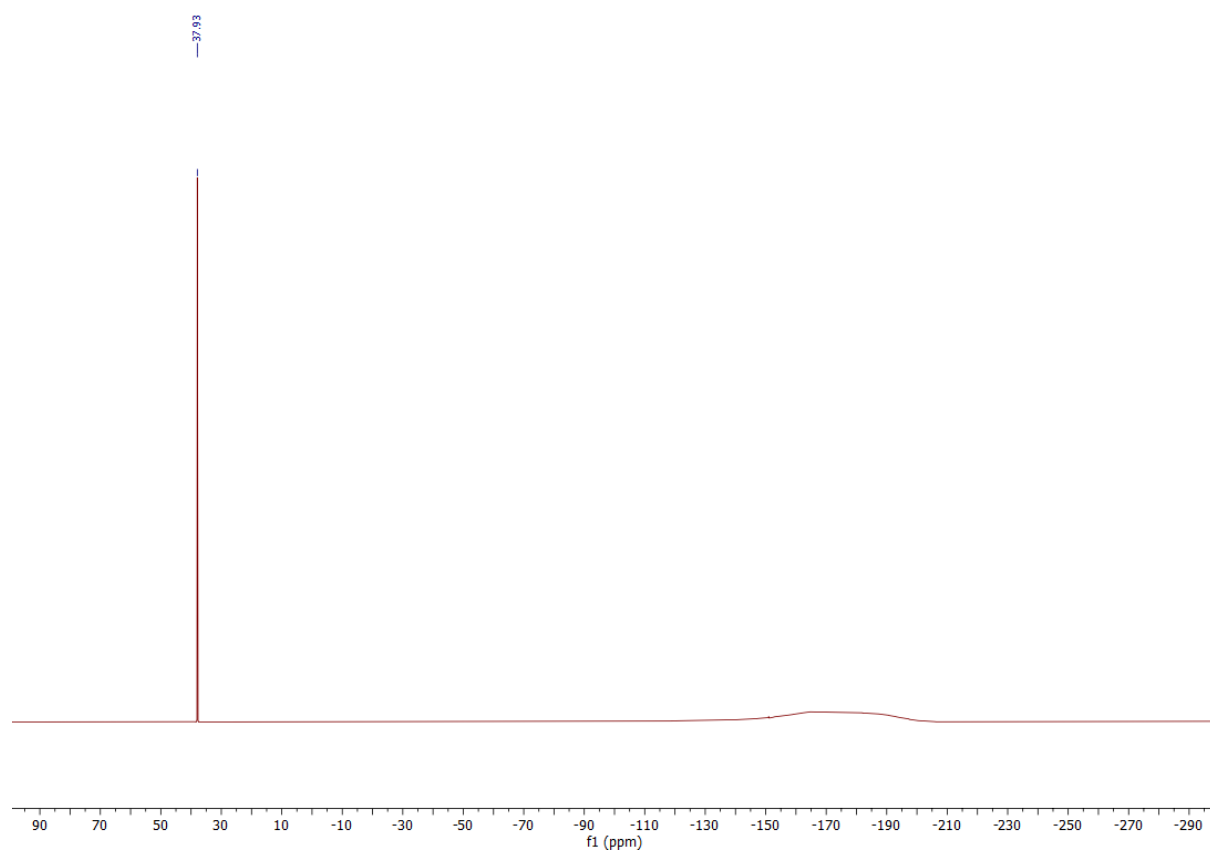





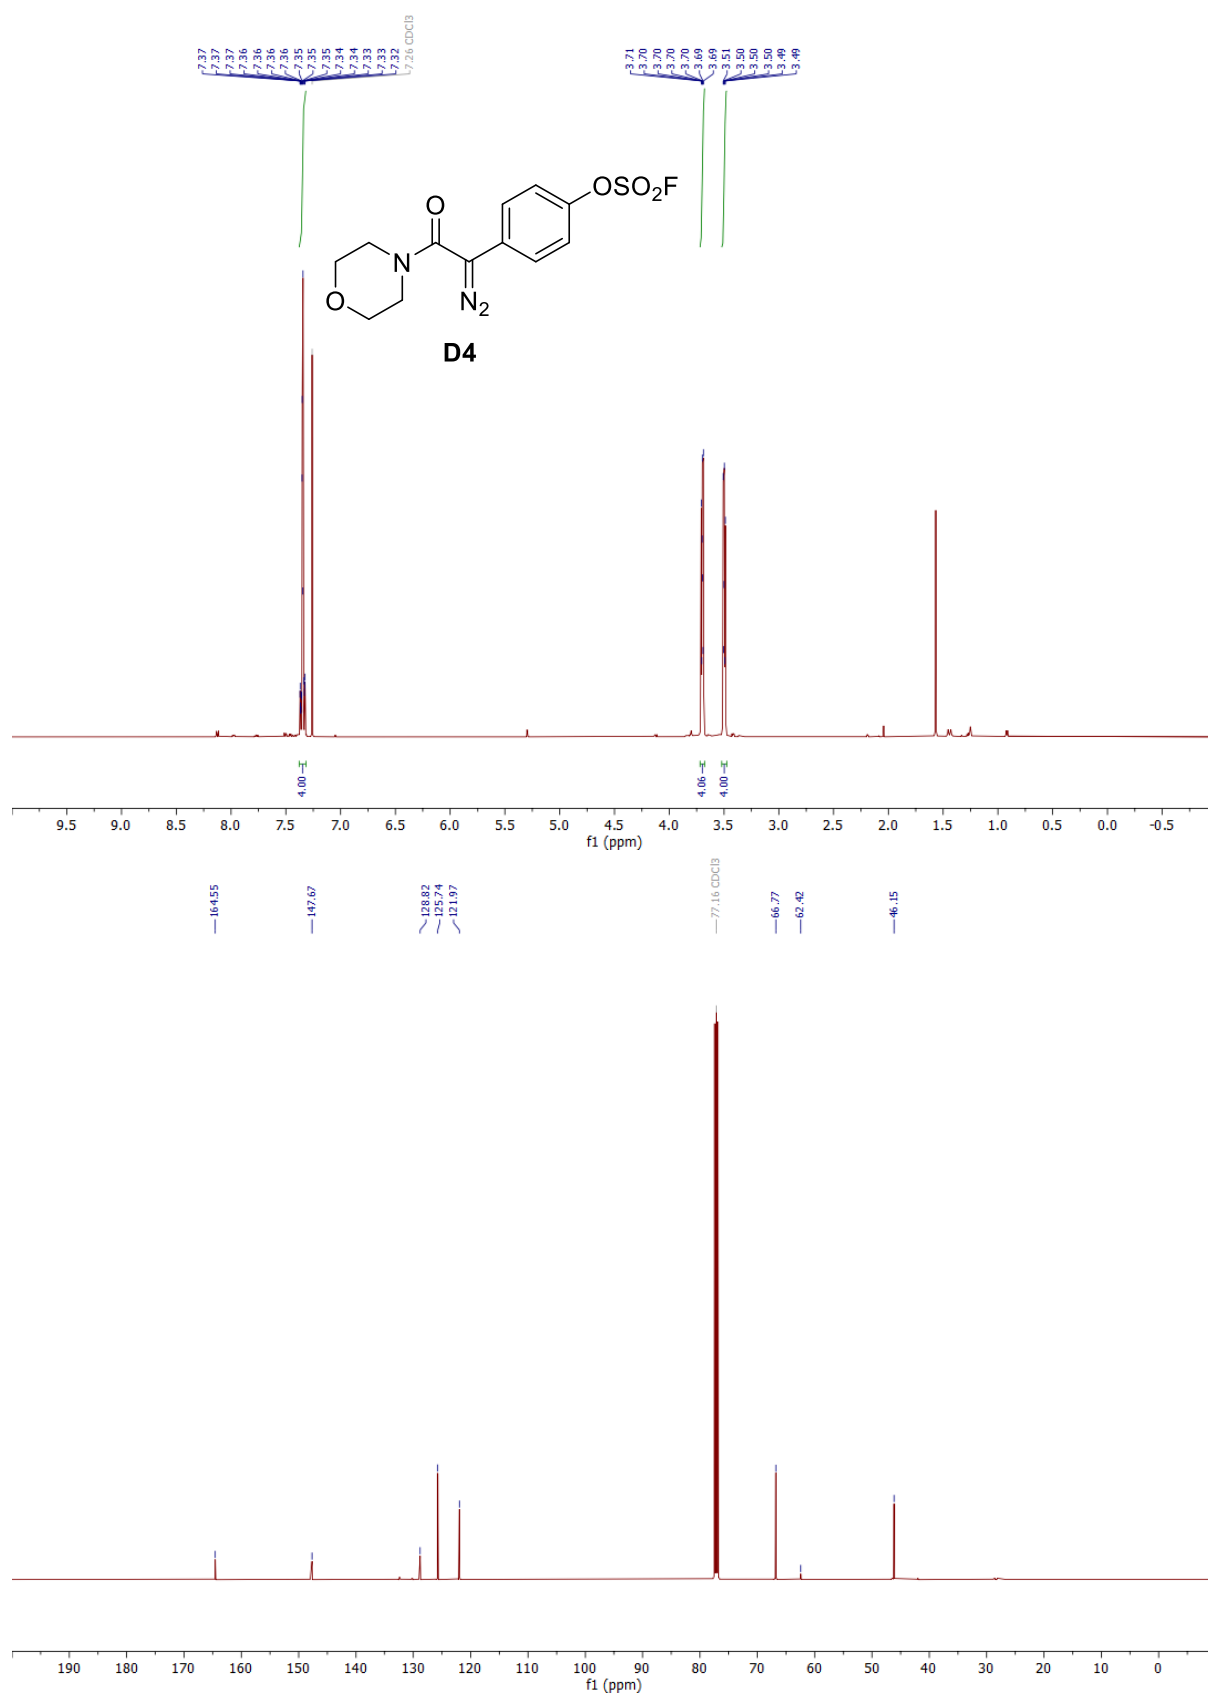

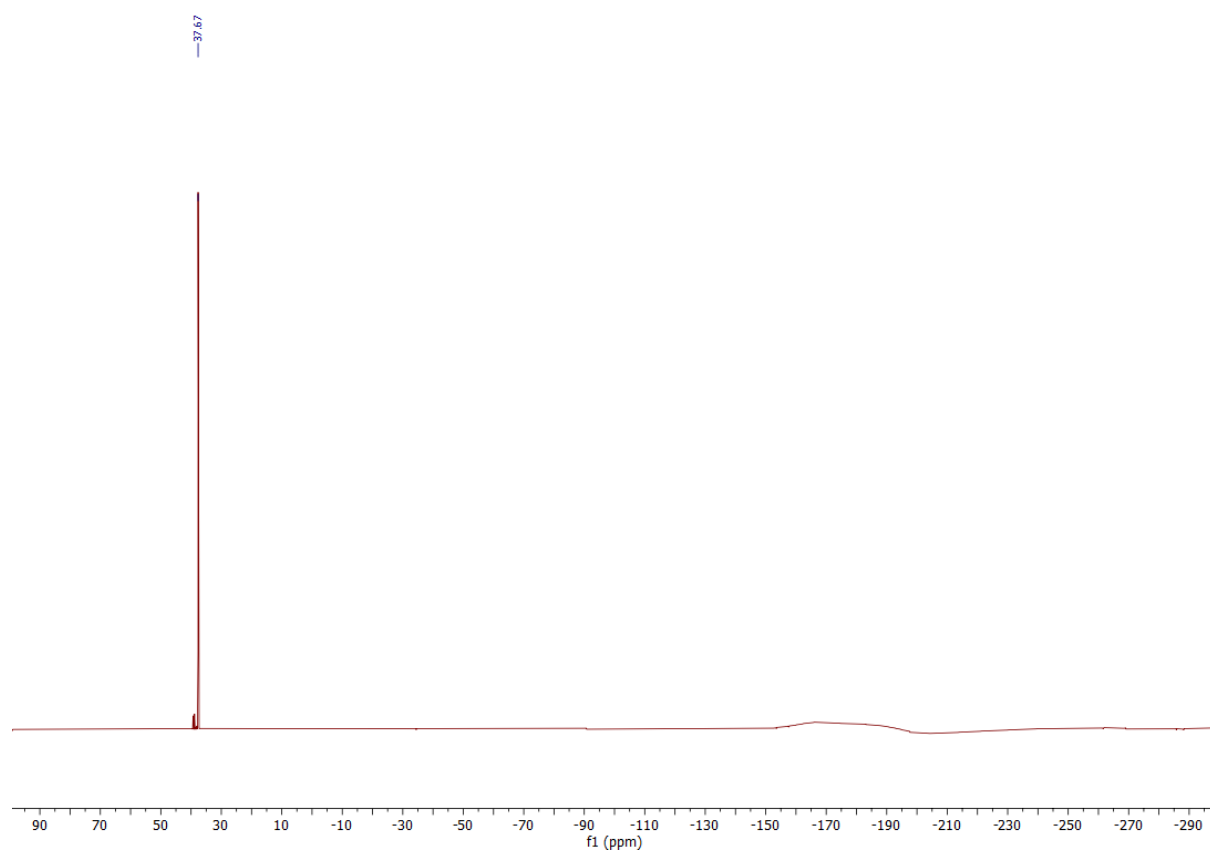

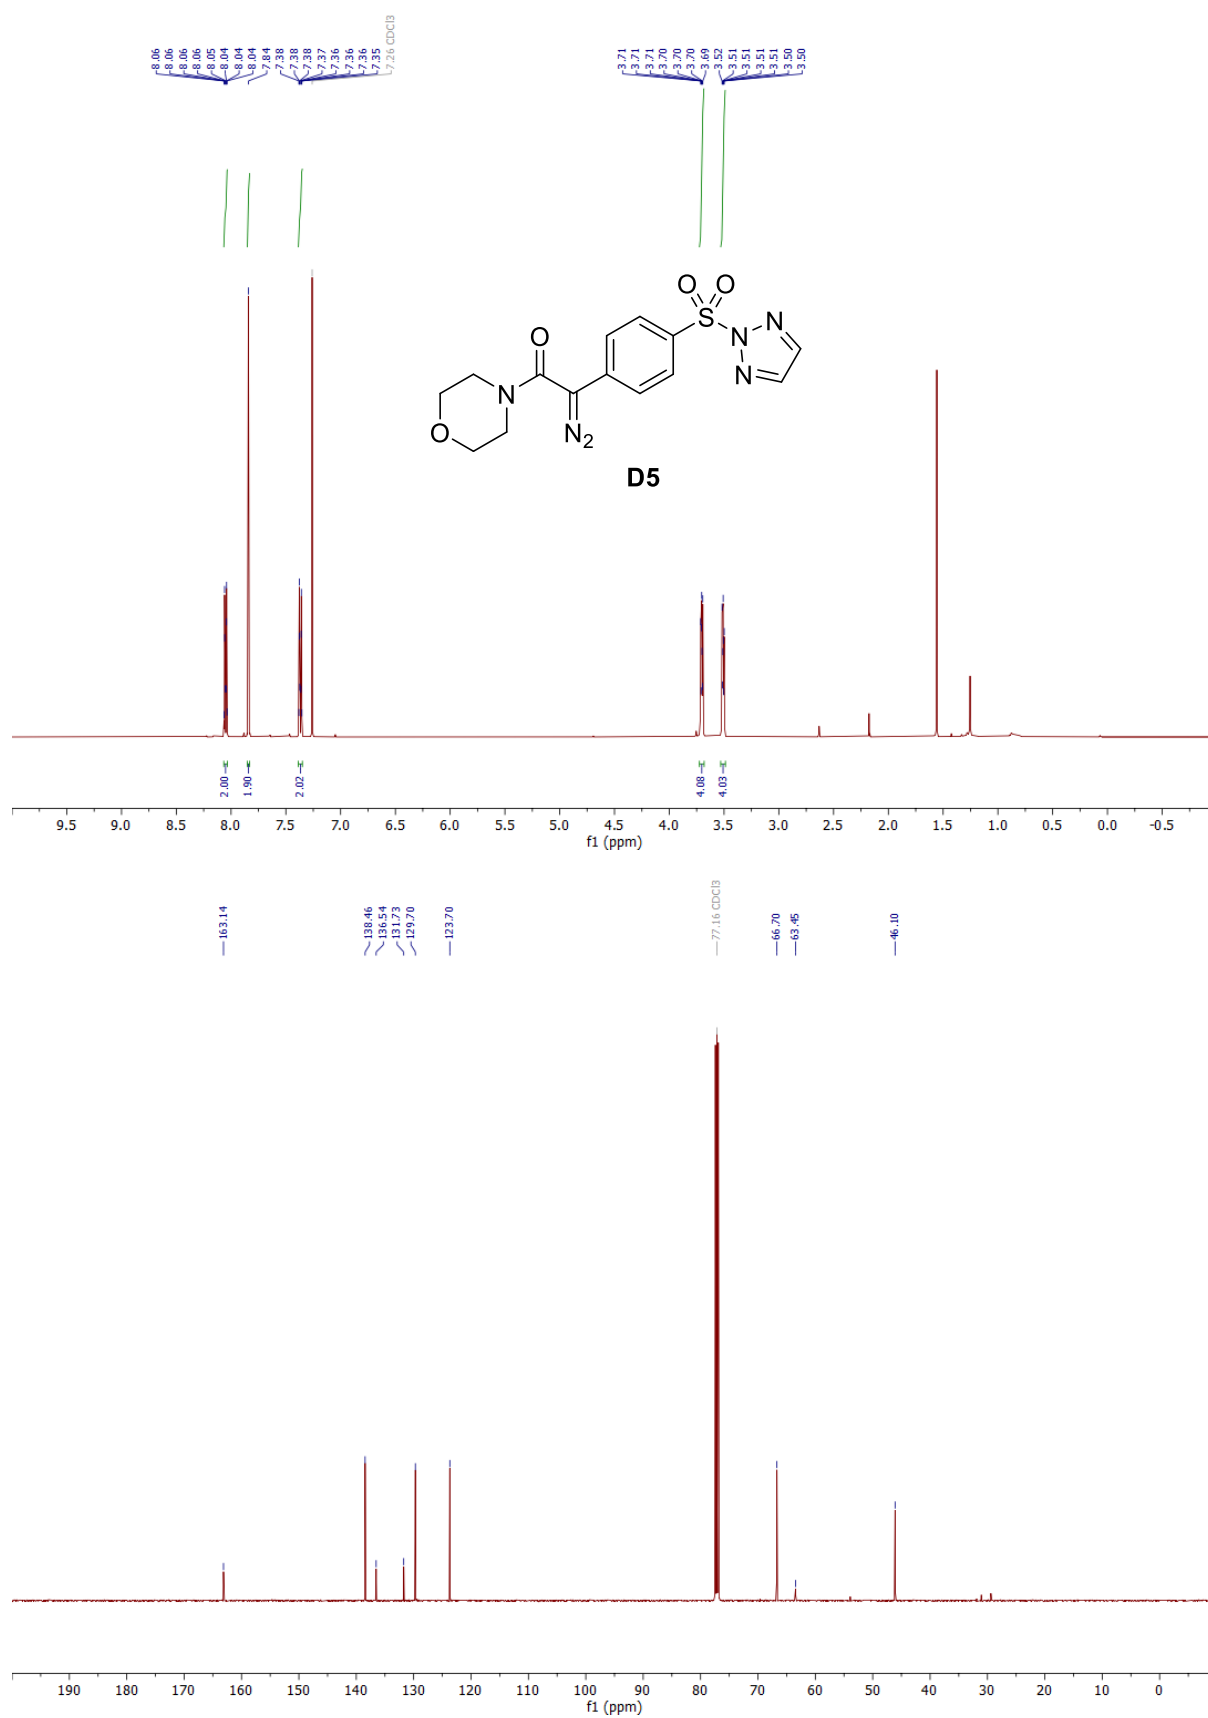

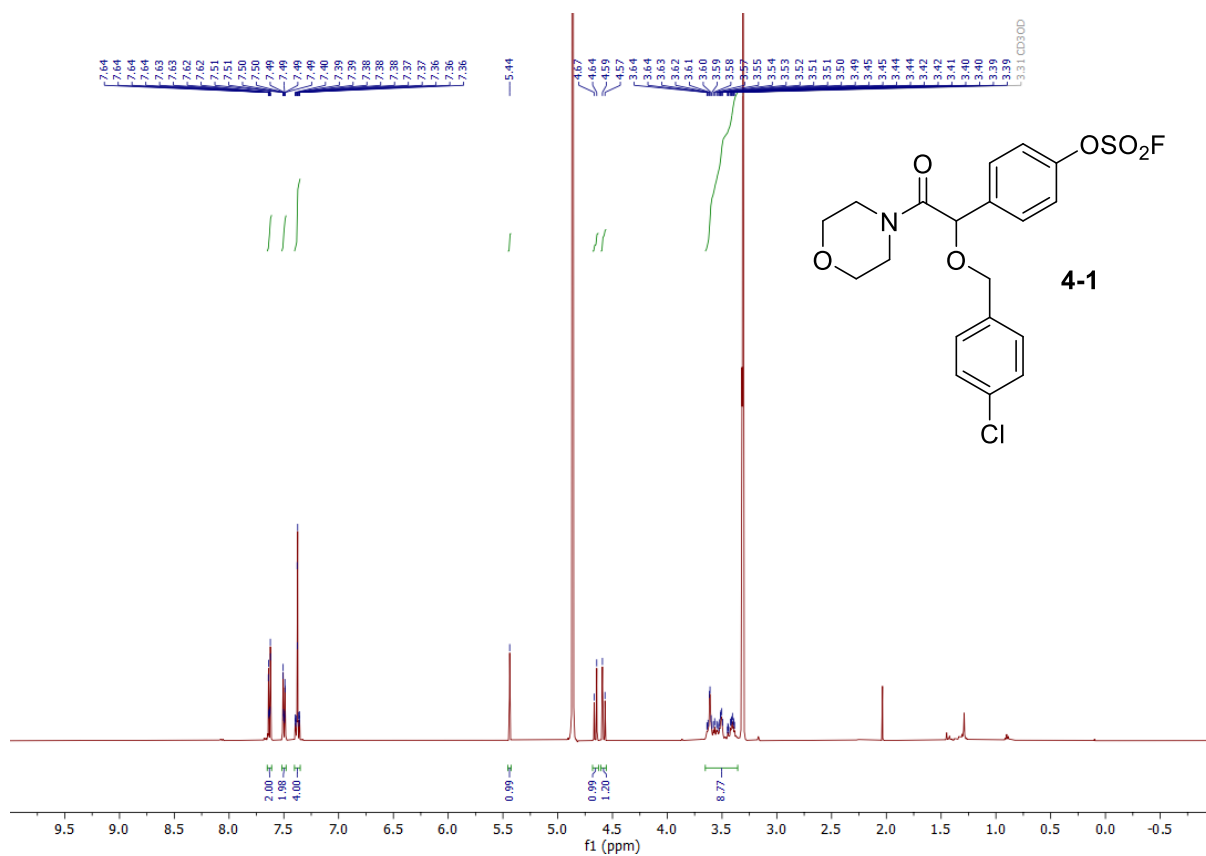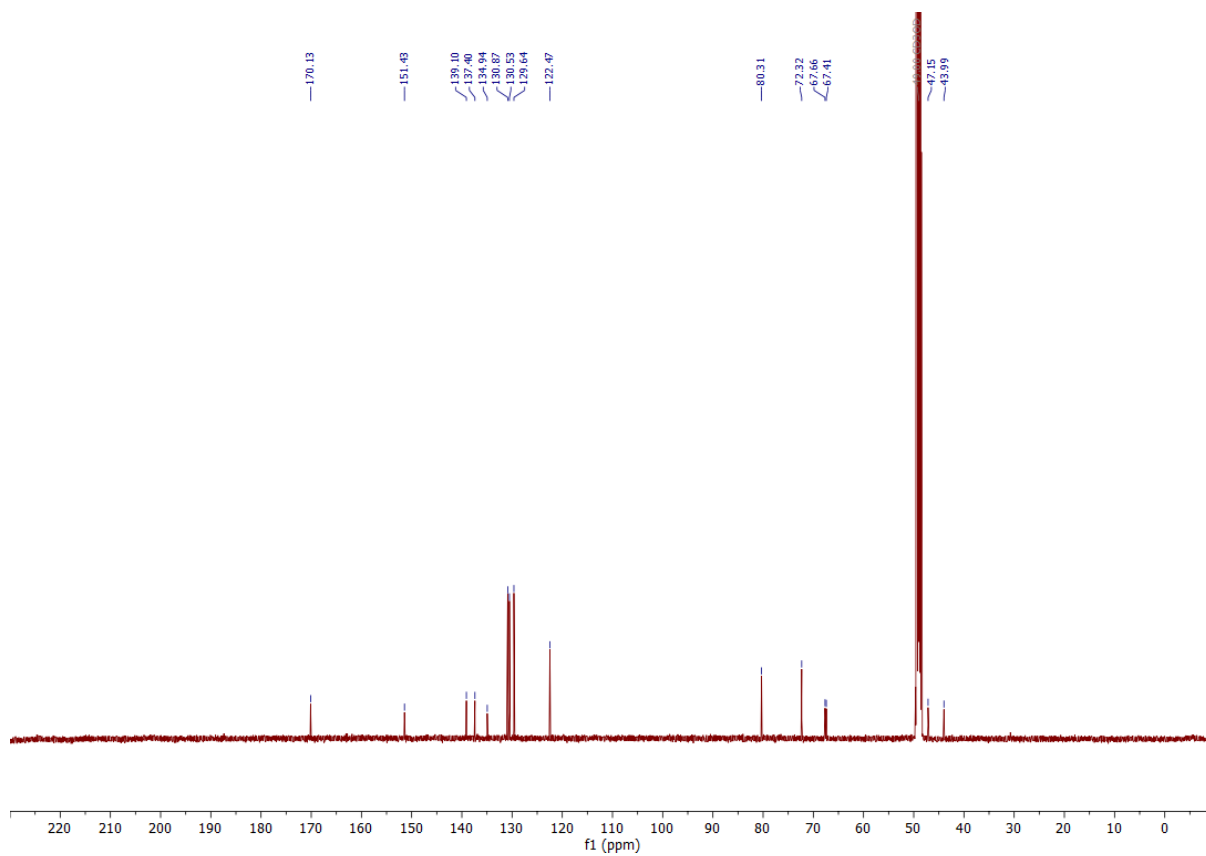

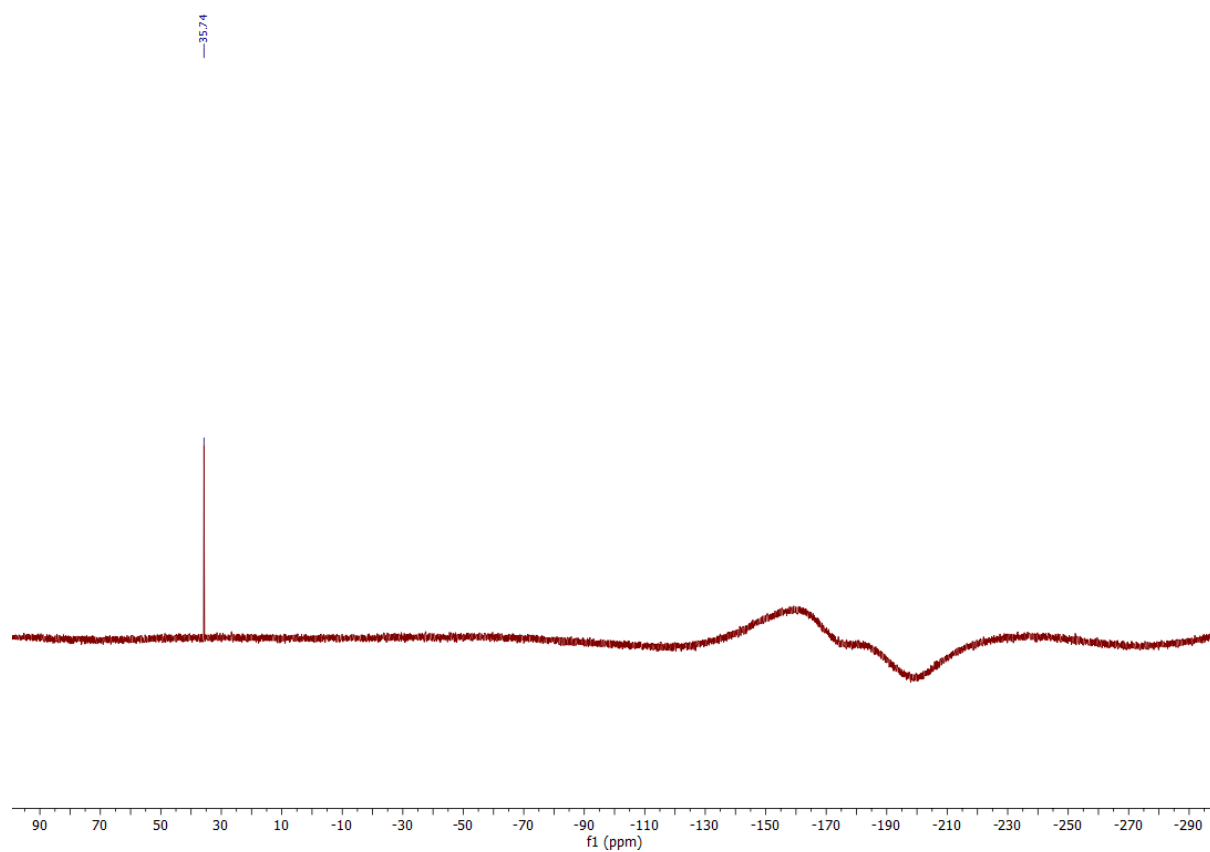

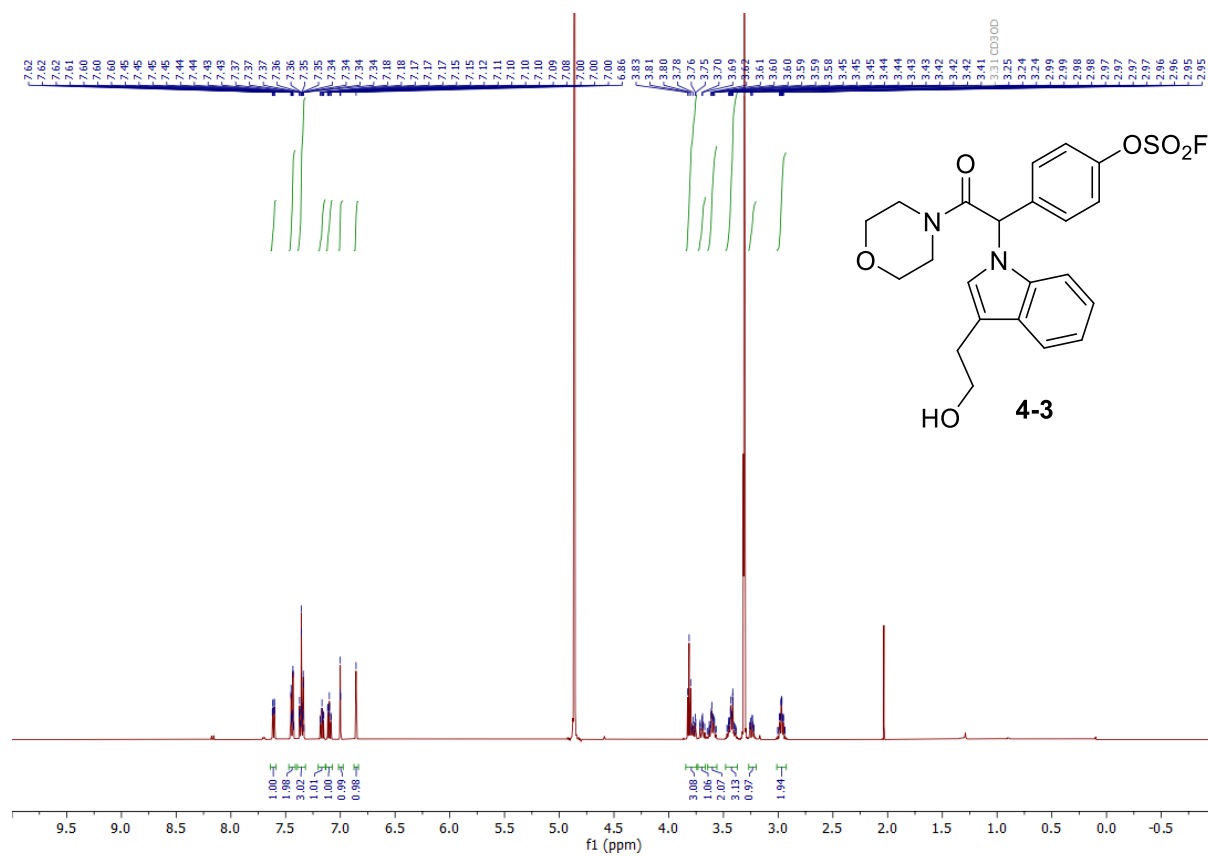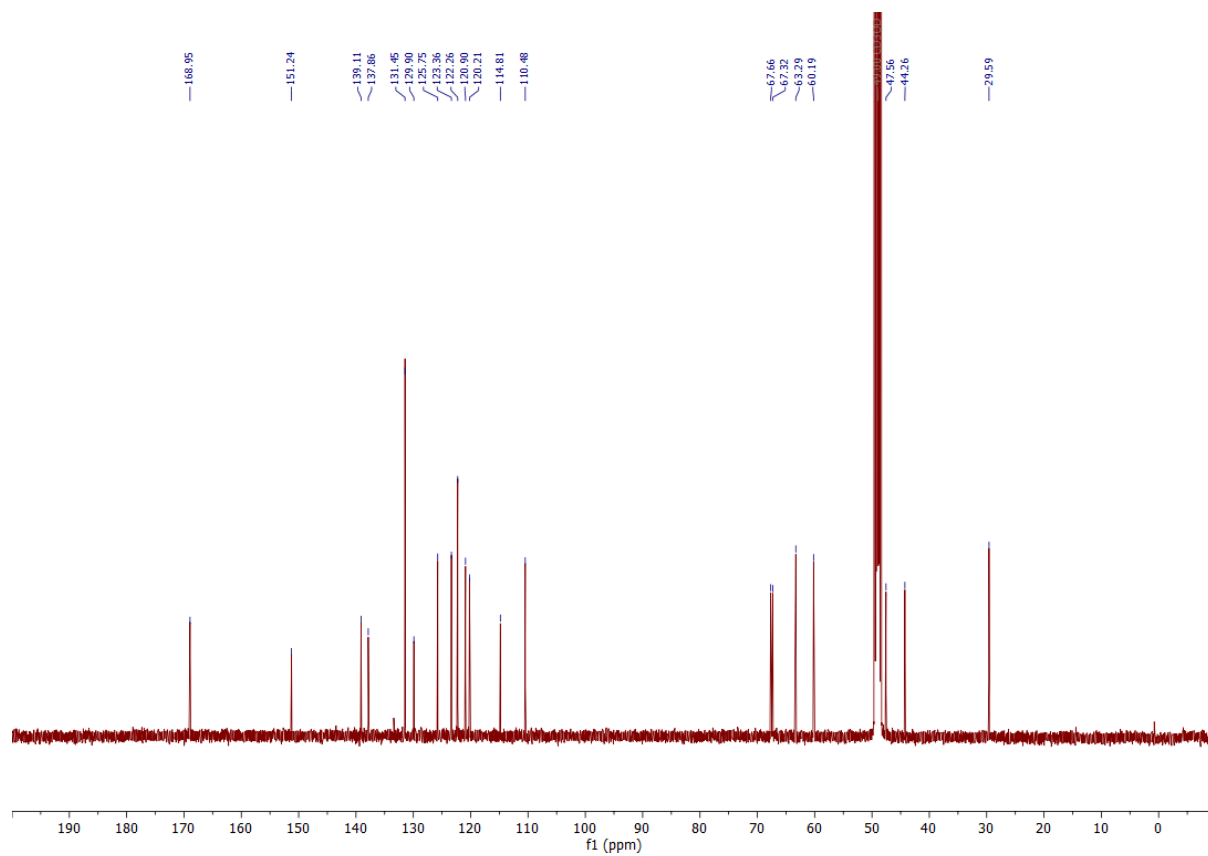

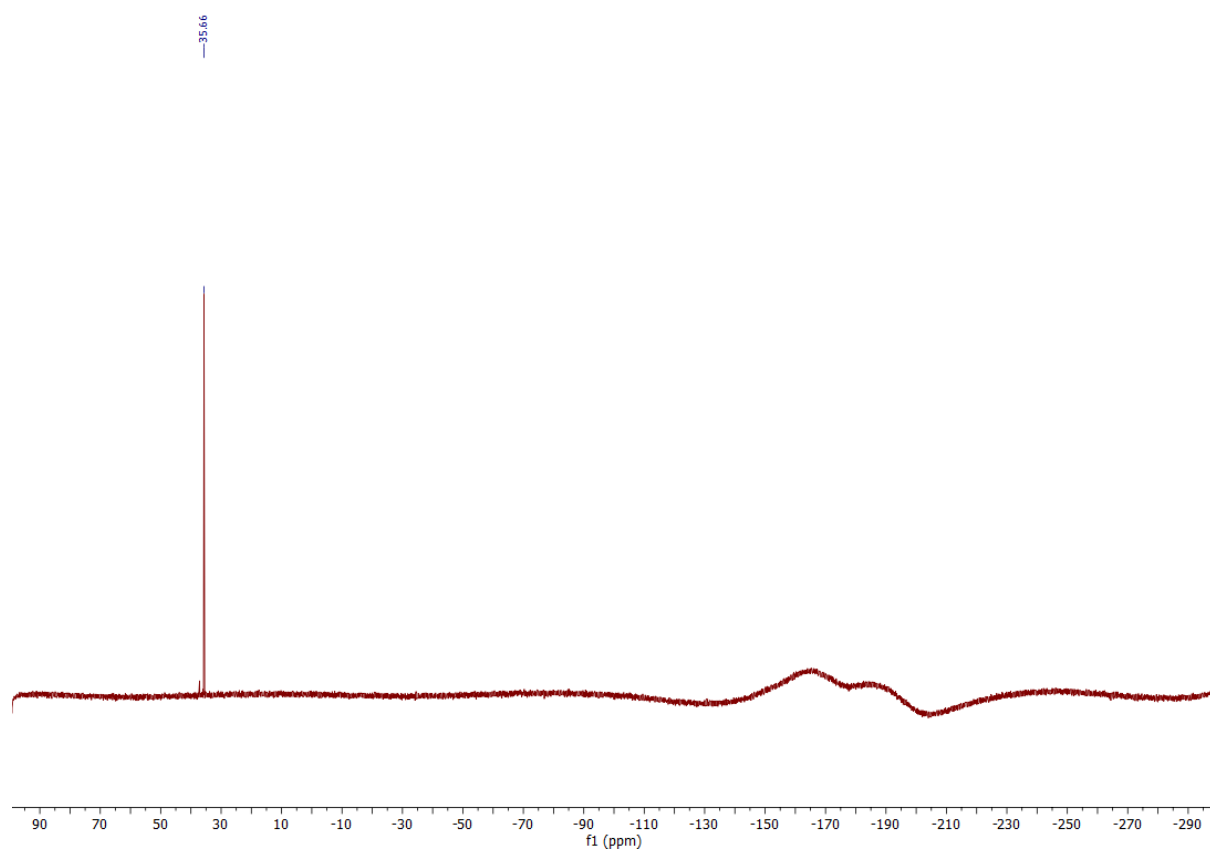

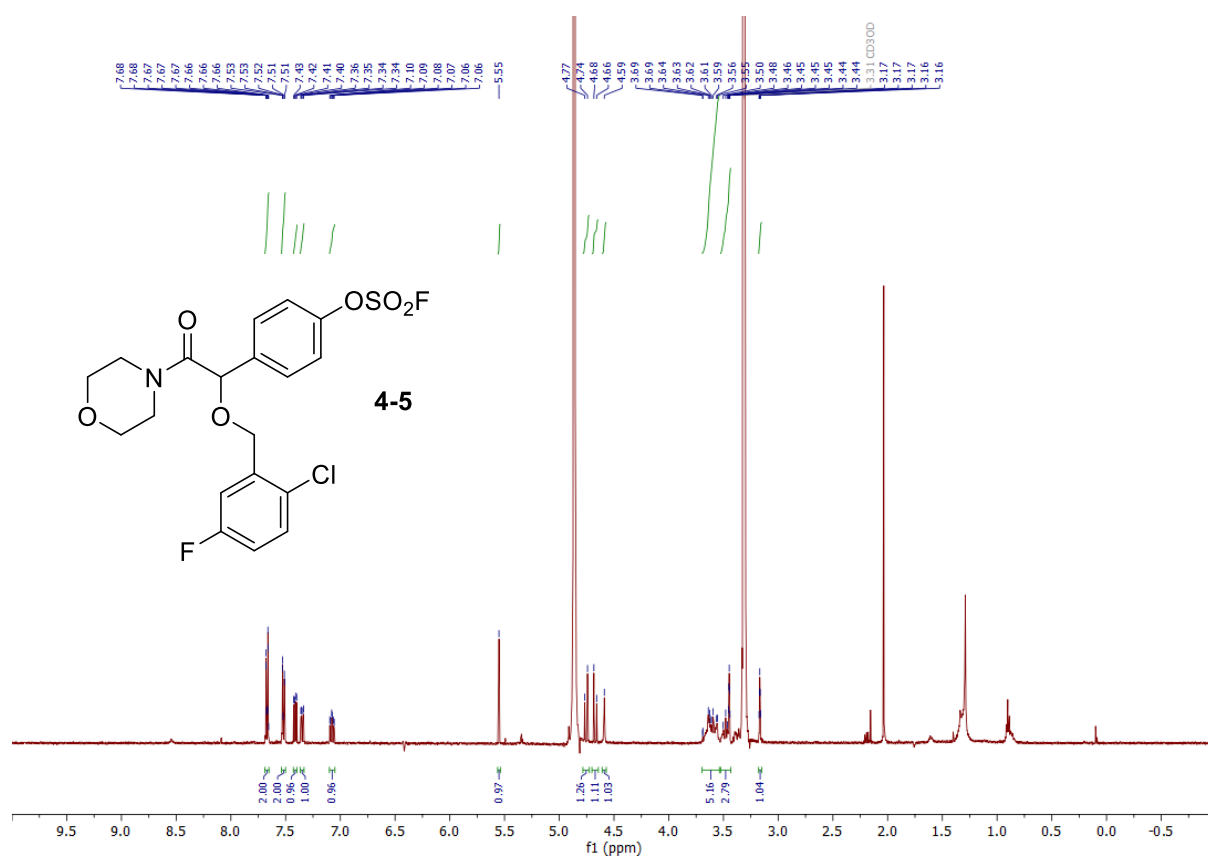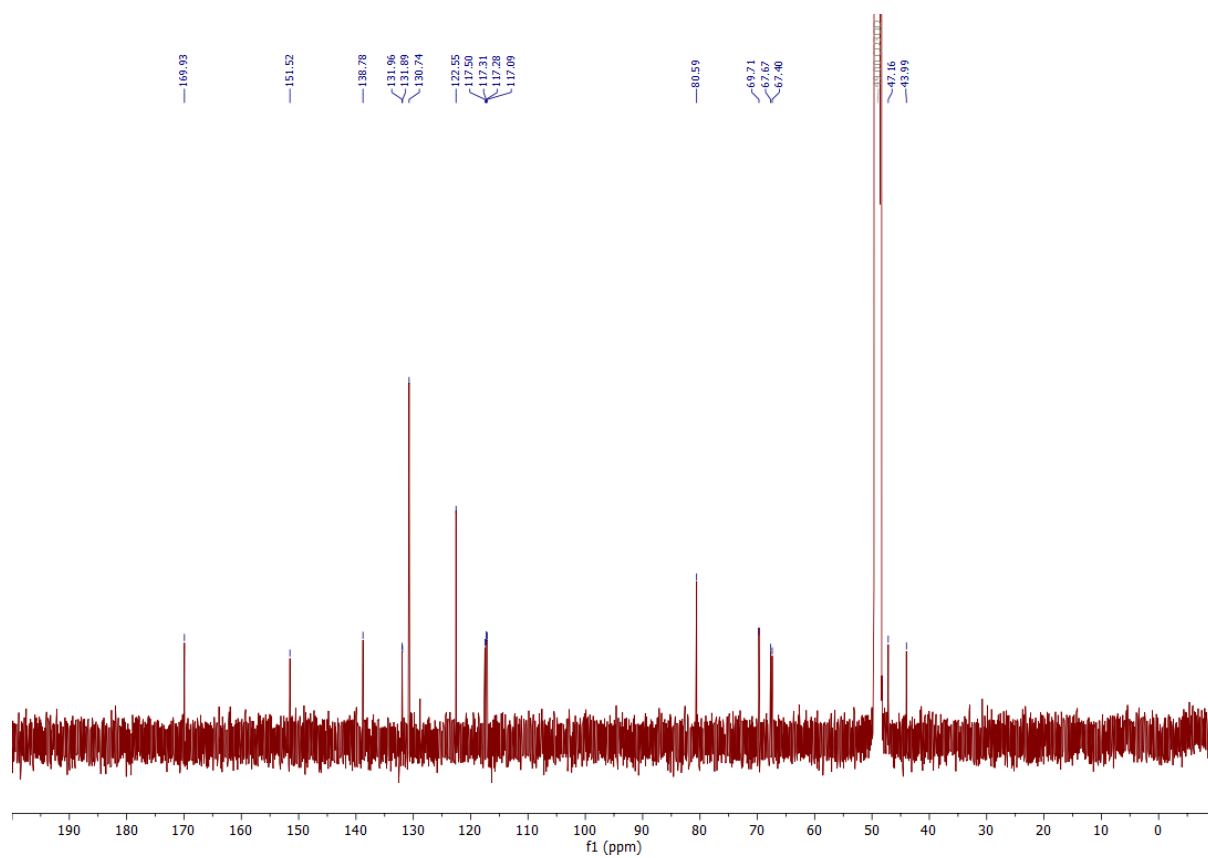



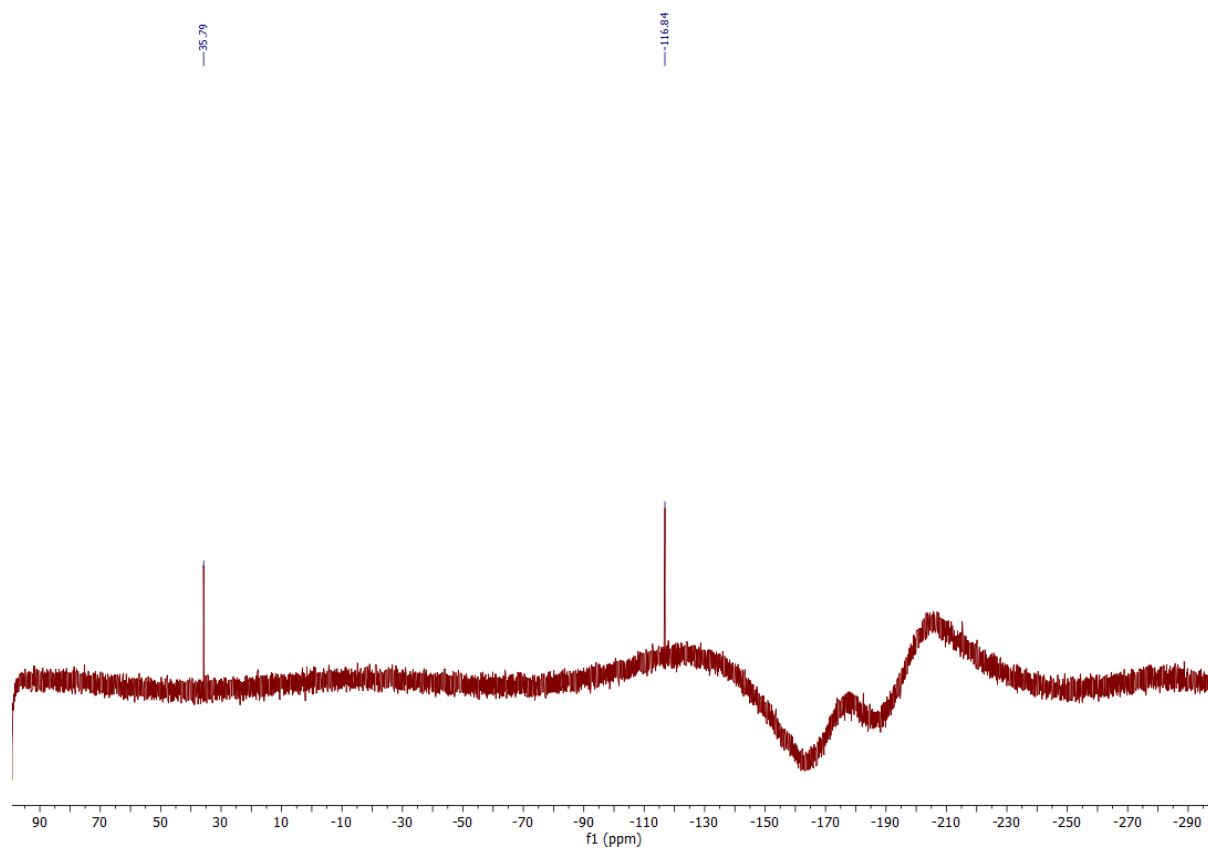

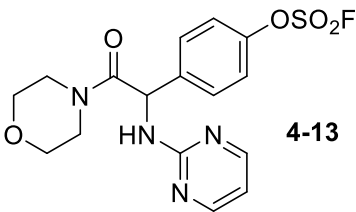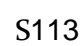

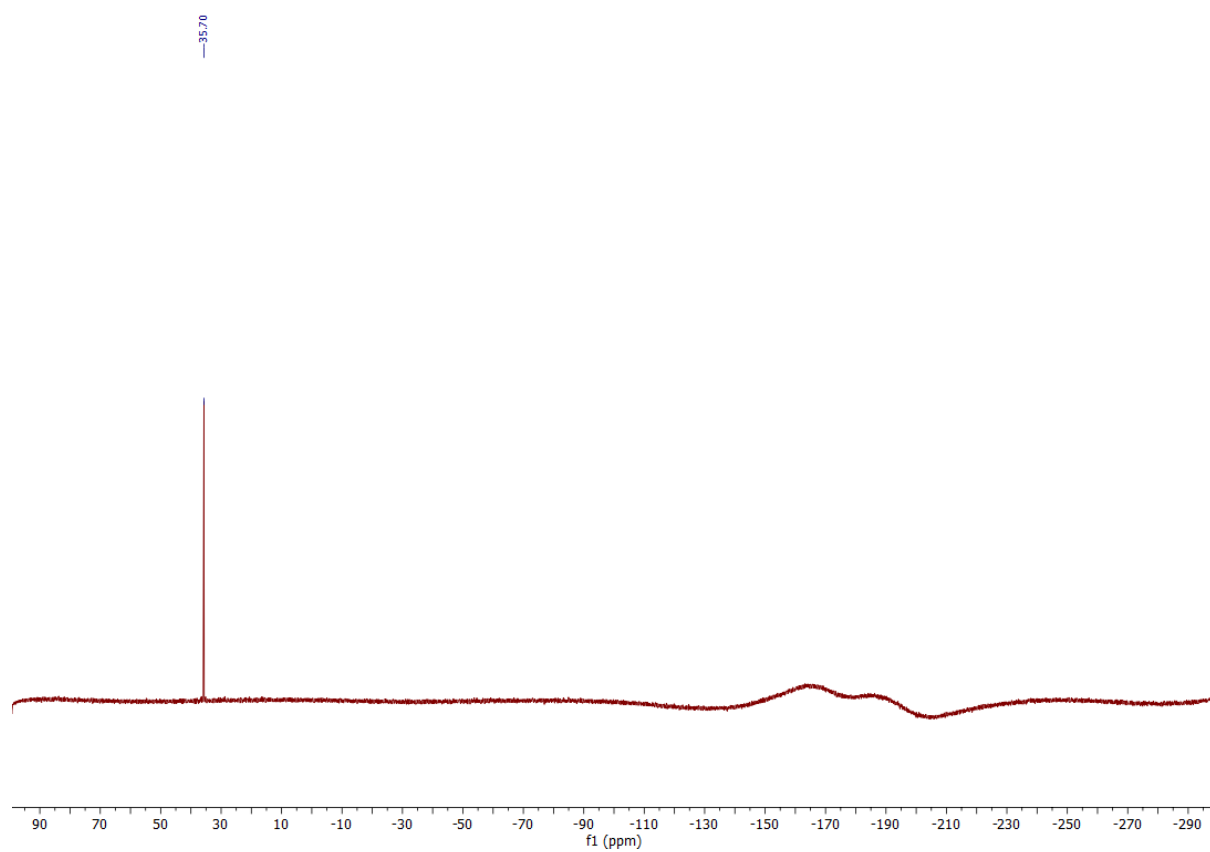

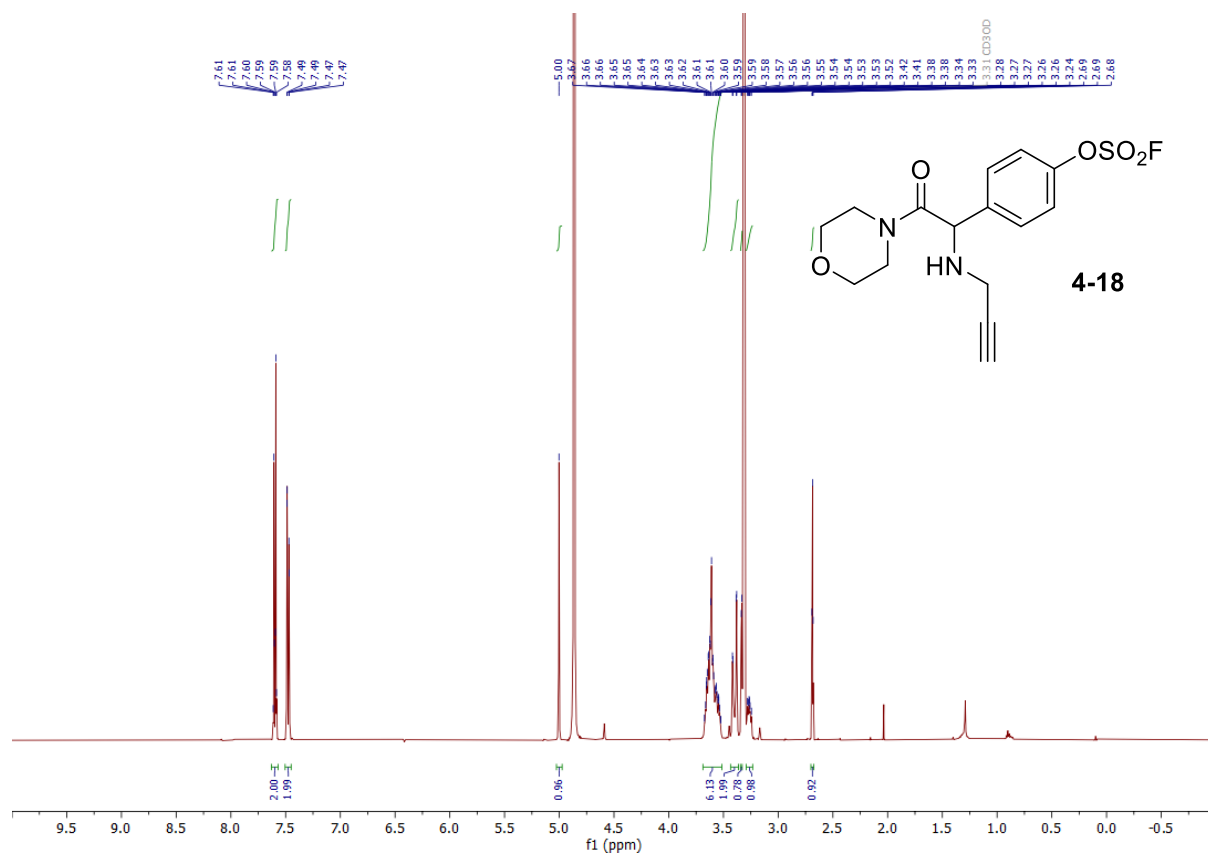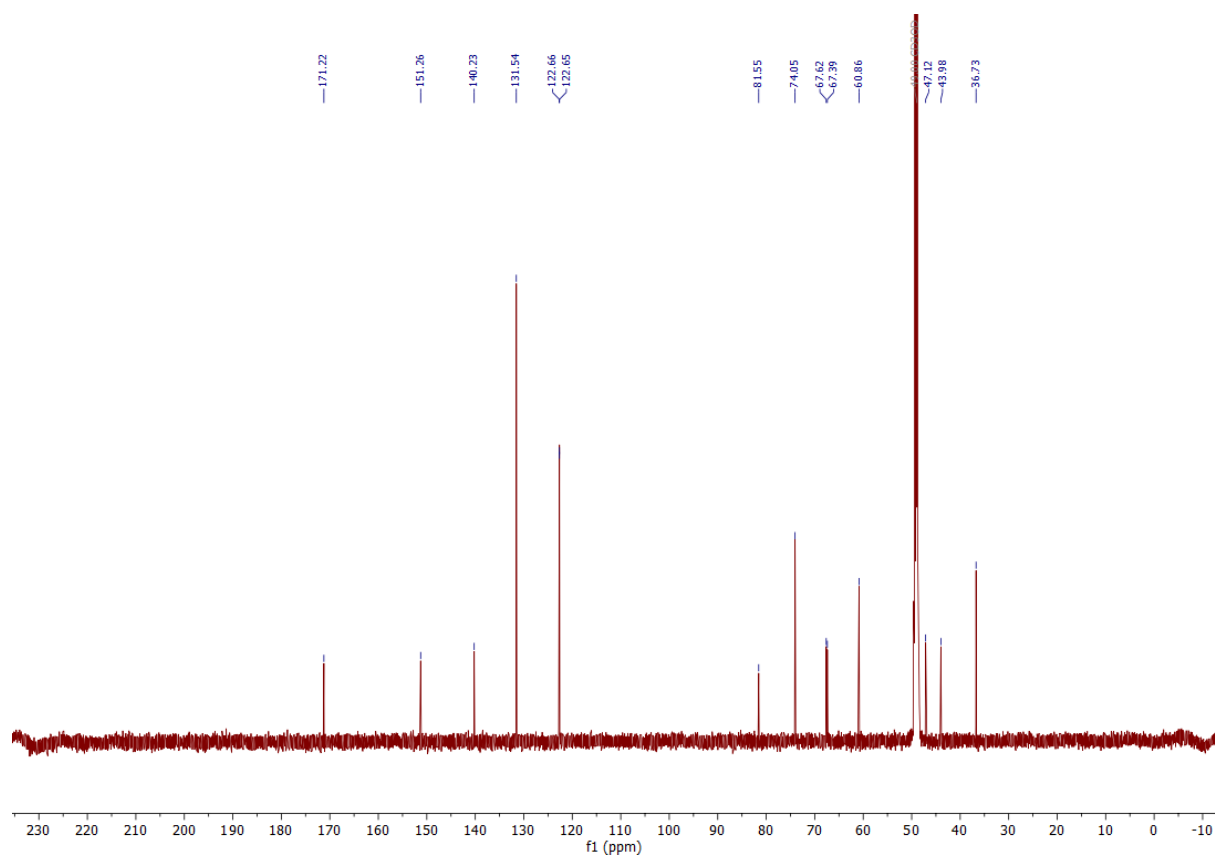

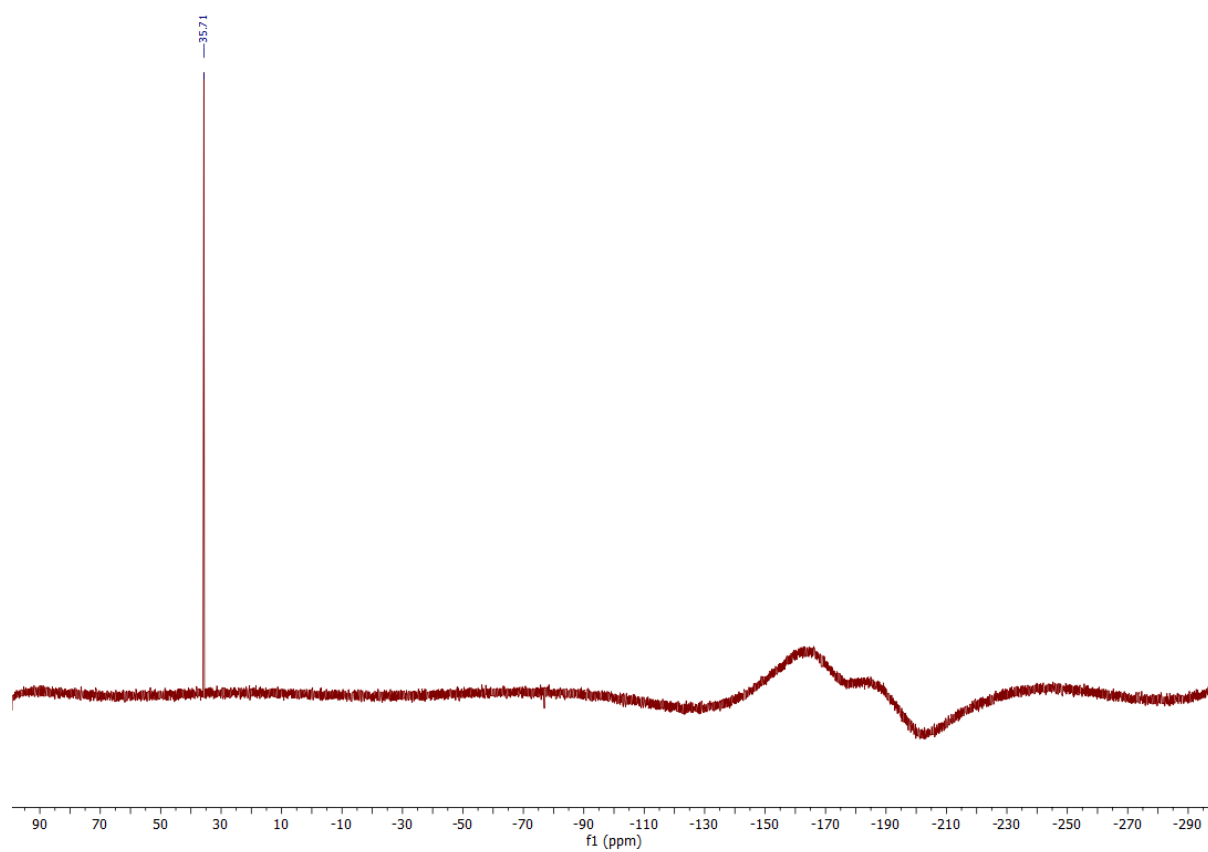

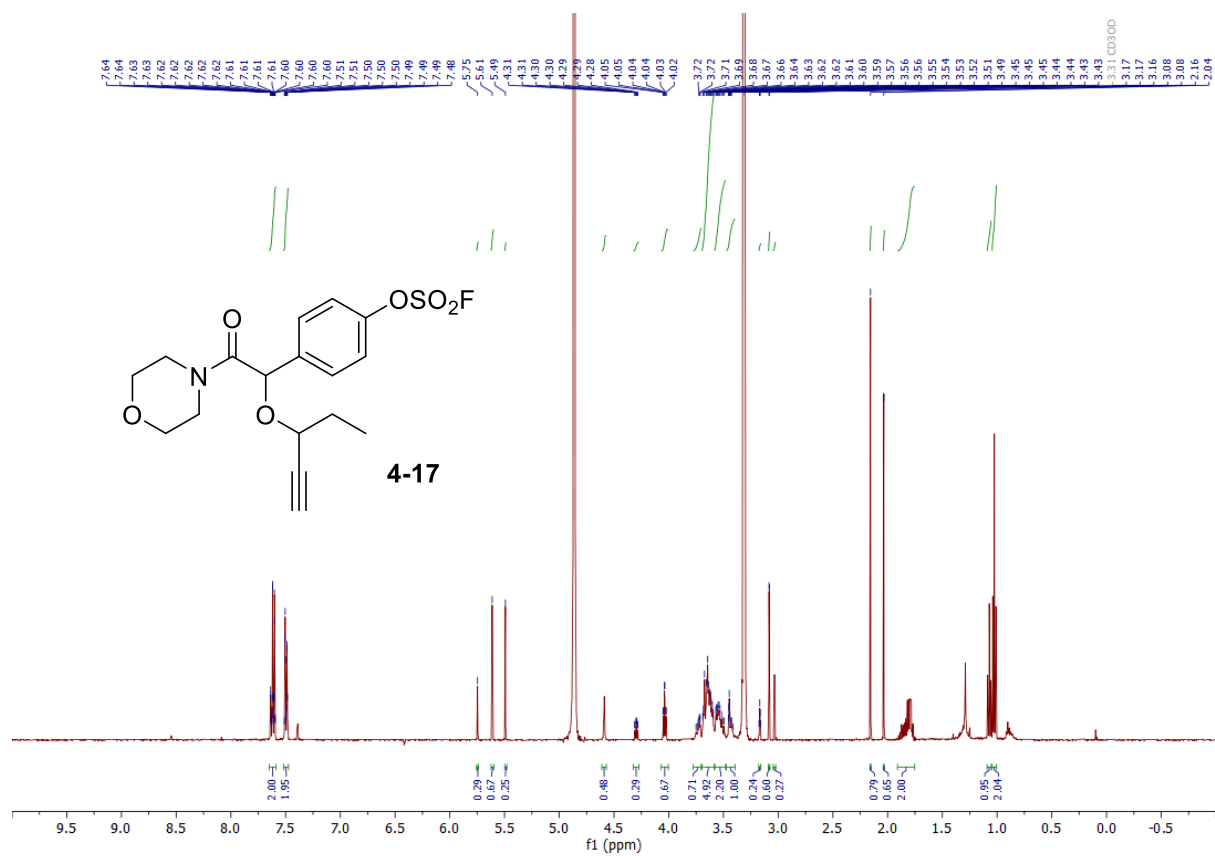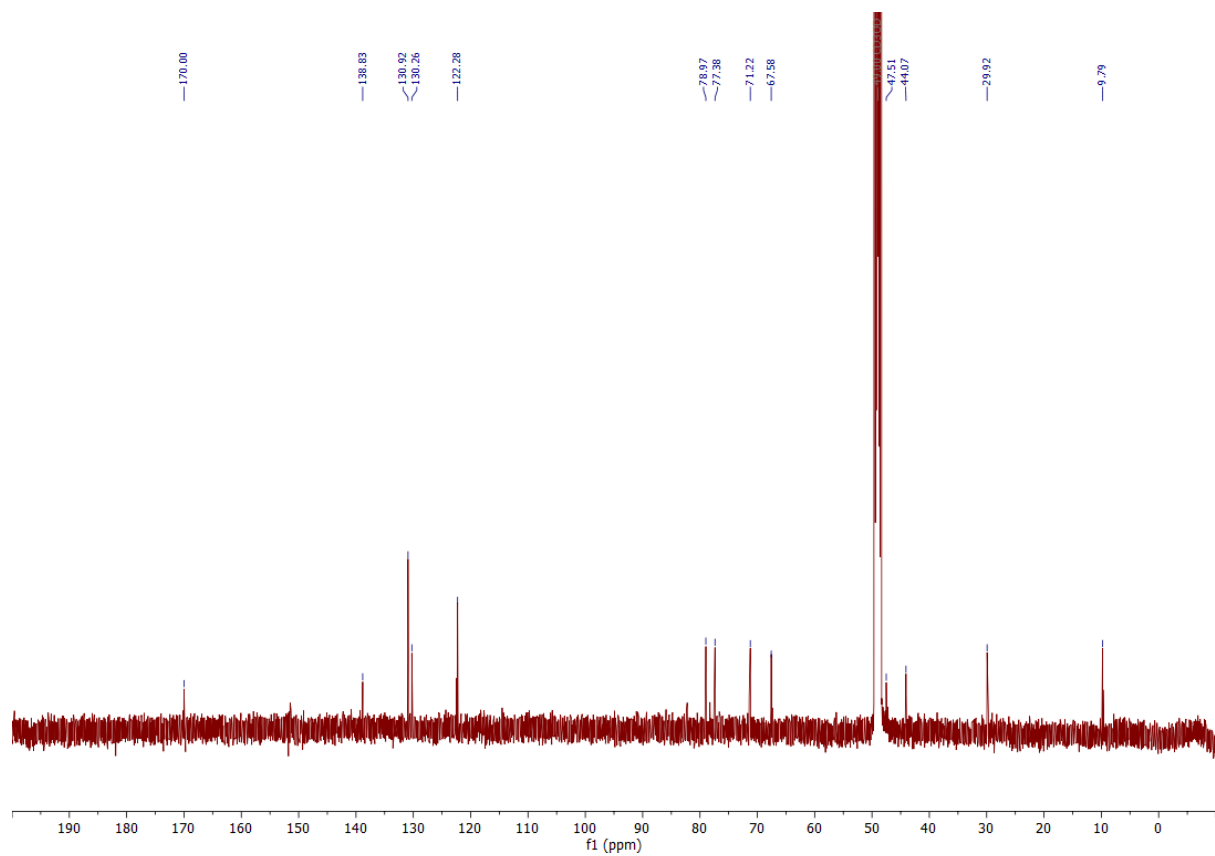

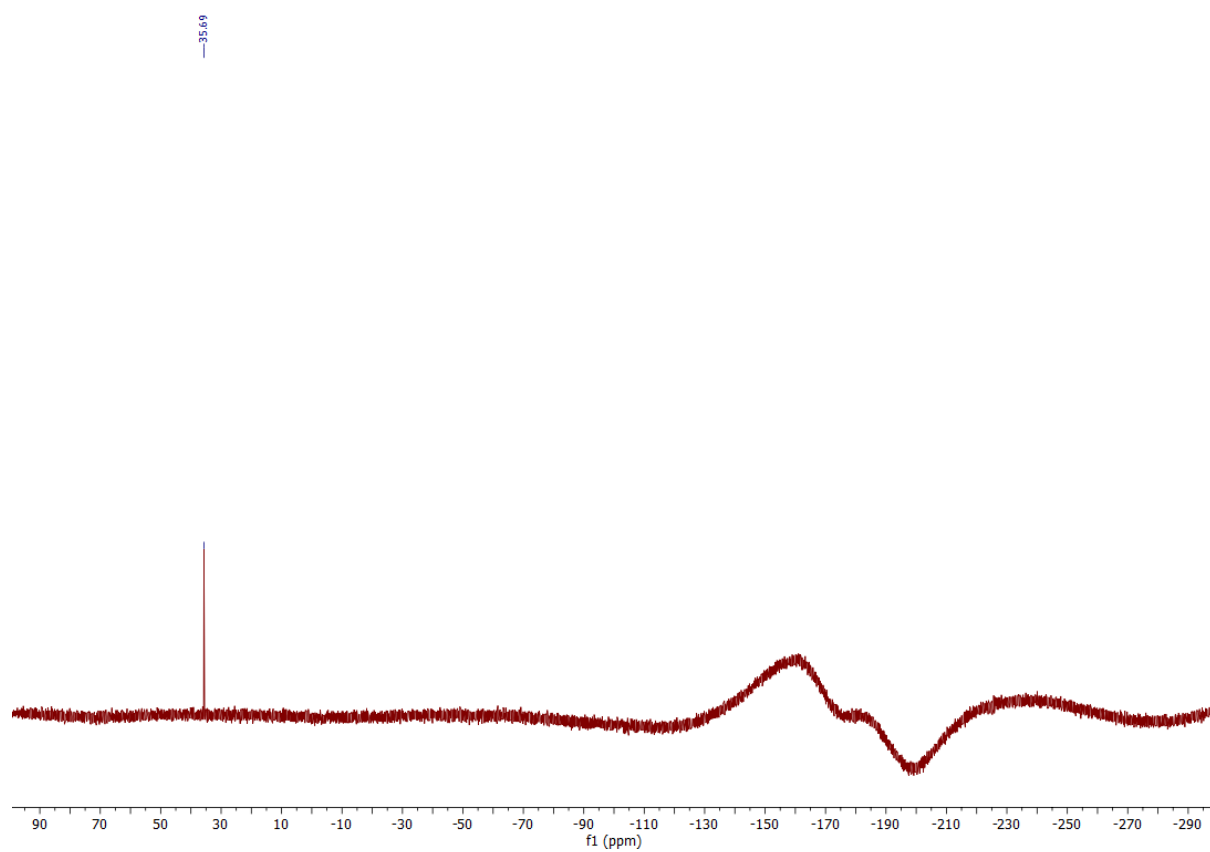

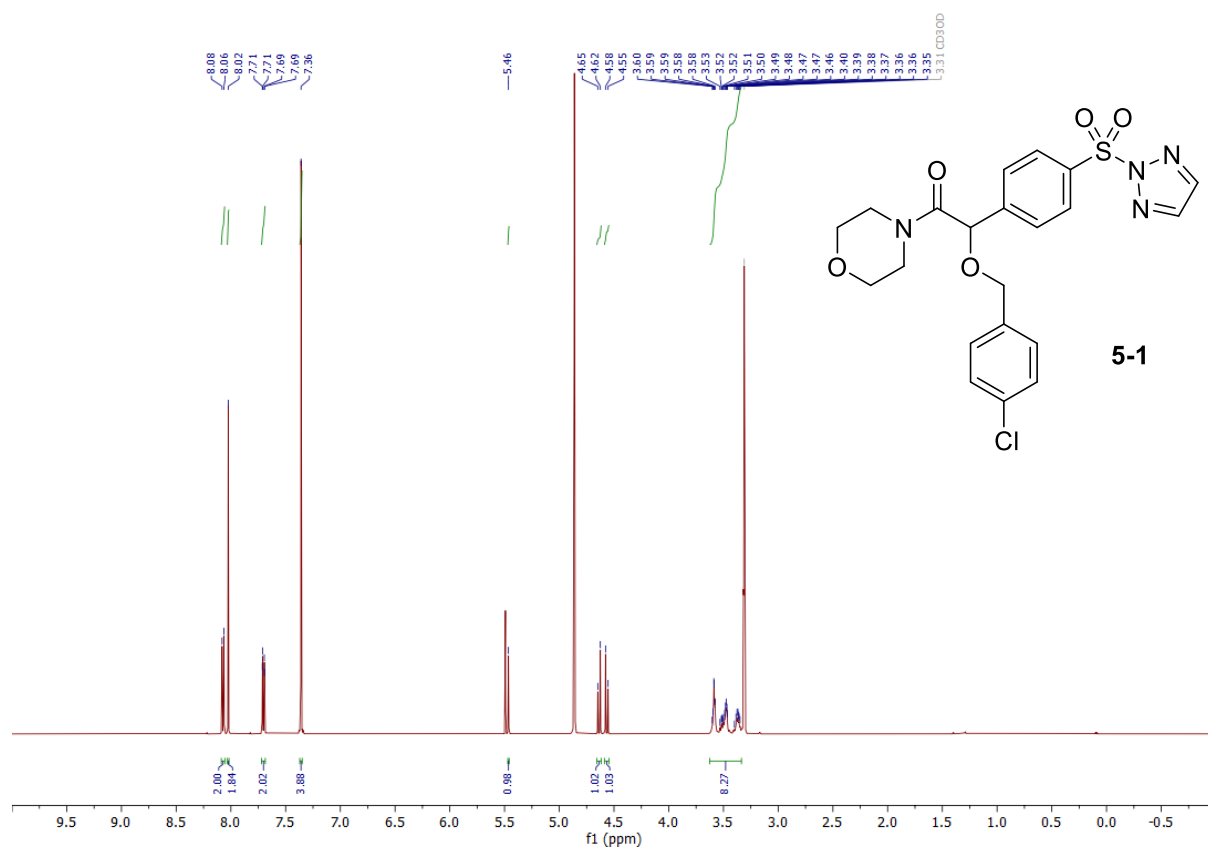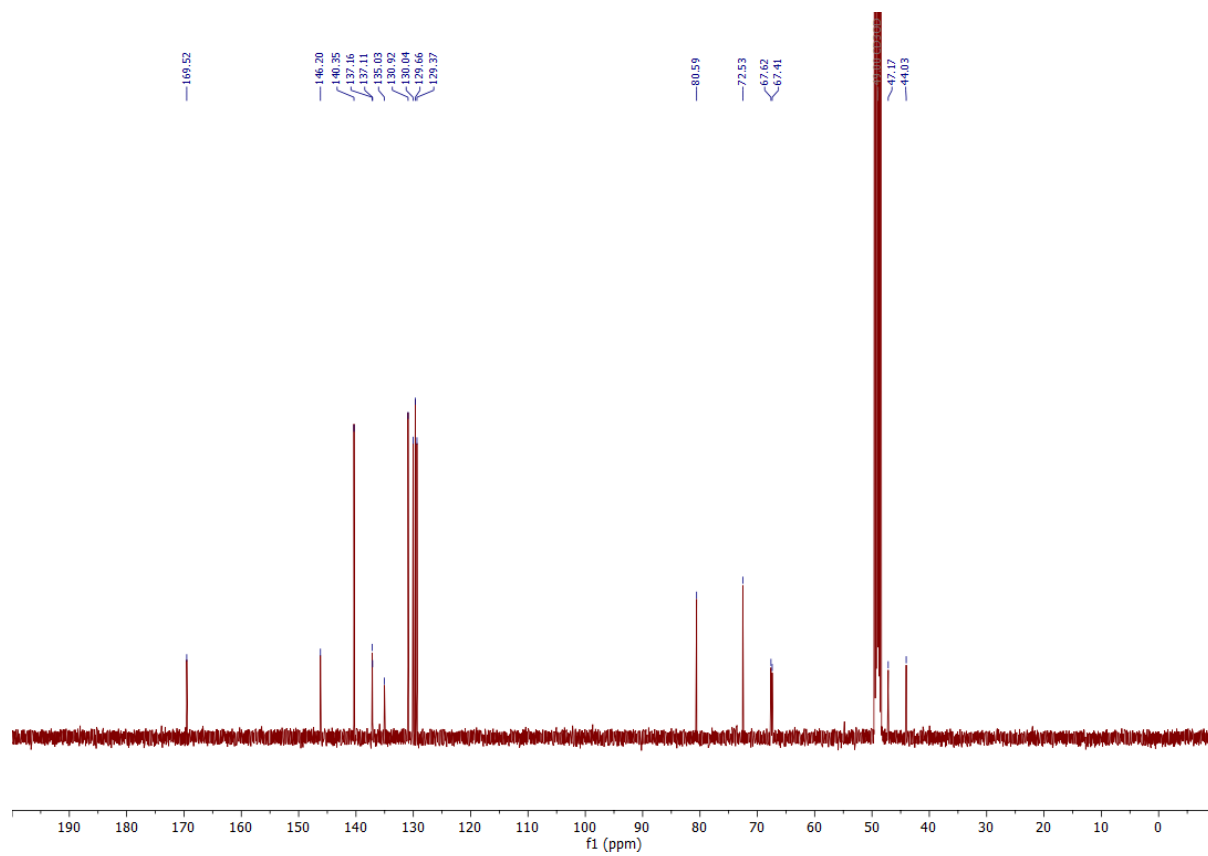



## References

1. (a) A. I. Green, F. Hobor, C. P. Tinworth, S. Warriner, A. J. Wilson and A. Nelson, *Chem. Eur. J.*, 2020, **26**, 10682-10689; (b) A. W. Squibb, M. R. Taylor B. L. Parnas, G. Williams, R. Girdler, P. Waghorn, A. G. Wright and F. Pullen F. S. *J. Chrom. A*, 2008, **1189**, 101-108; (c) S. D. Griggs, A.-S. Piticari, S. Liver, C. Arter, S. Sievers, S. P. Marsden and A. Nelson, *Chem. Commun.* 2025, **61**, 3528-3531.
2. D. Louvel, A. Chelagha, J. Rouillon, P. Payard, L. Khrouz, C. Monnereau and A. Tlili, *Chem. Eur. J.*, 2021, **27**, 8704-8708.
3. G. F. Zha, Q. Zheng, J. Leng, P. Wu, H. L. Qin and K. B. Sharpless, *Angew. Chem. Int. Ed.*, 2017, **56**, 4849-4852.
4. N. Döben, H. Yan, M. Kischewitz, J. Mao and A. Studer, *Org. Lett.*, 2018, **20**, 7933–7936.
